# Supplementary material for: Asymmetric [3+2]-cyclization of α-imino amide surrogates to construct 3,4-diaminopyrrolidine-2,5-diones
Source: Royal Society of Chemistry journal article supplement (doi:10.1039/d3cc01203d), 2023-01-01
Supplement: d3cc01203d1.pdf [file d3cc01203d1.pdf]

# Supporting Information

## **Asymmetric [3+2]-Cyclization of $\alpha$ -Imino Amide Surrogates to Construct 3,4-Diaminopyrrolidine-2,5-diones**

Peiran Ruan, Cefei Zhang, Jin Wu, Fengnan Xiao, Yongyan Zhang, Qingfa Tan, Zhishan Su,  
Xiaoming Feng and Xiaohua Liu\*

Key Laboratory of Green Chemistry & Technology, Ministry of Education, College of Chemistry, Sichuan  
University, Chengdu 610064, China

E-mail: liuxh@scu.edu.cn

# Content

|                                                                      |     |
|----------------------------------------------------------------------|-----|
| 1. General Information .....                                         | 3   |
| 2. General procedure for the preparation of the substrates.....      | 4   |
| 3. General procedures for the preparation of the products .....      | 5   |
| 4. Scope limitation .....                                            | 6   |
| 5. Optimization of the reaction conditions .....                     | 6   |
| 6. Gram-scale synthesis .....                                        | 12  |
| 7. Further transformations of the products.....                      | 13  |
| 8. Determination of absolute configurations of compounds.....        | 14  |
| 9. Computational details.....                                        | 16  |
| 10. Characterization of some substrates .....                        | 23  |
| 11. Analysis results of 2D NMR spectra of the product C1 and D3..... | 24  |
| 13. Characterization of the products .....                           | 30  |
| 14. Copies of NMR spectra for substrates .....                       | 64  |
| 15. Copies of NMR spectra for products .....                         | 67  |
| 16. Reference .....                                                  | 102 |

## 1. General Information

NMR characterization data were collected on Bruker ASCEND™ operating at 400 MHz for  $^1\text{H}$  NMR, 101 MHz for  $^{13}\text{C}\{^1\text{H}\}$  NMR (with complete proton decoupling), and 376 MHz for  $^{19}\text{F}\{^1\text{H}\}$  NMR (with complete proton decoupling).  $^1\text{H}$  NMR and  $^{13}\text{C}\{^1\text{H}\}$  NMR: chemical shifts  $\delta$  were recorded in ppm relative to tetramethylsilane and internally referenced to the residual solvent signal (for  $^1\text{H}$  NMR:  $\text{CDCl}_3 = 7.26$  ppm; for  $^{13}\text{C}$  NMR:  $\text{CDCl}_3 = 77.16$  ppm). Data were reported as follows: chemical shift, multiplicity (s = singlet, d = doublet, t = triplet, q = quartet, dd = doublet of doublets, td = triplet of doublets, dt = doublet of triplets, m = multiplet), coupling constants (Hz), integration. Supercritical fluid chromatography (SFC) was performed on Acquity UPC<sup>2</sup> using Daicel Chiralcel OX-3, OD-3, at 25 °C with UV detector at 254 nm and enantiomeric excesses (ee) and enantiomeric ratio (er) were determined in comparison with the authentic racemates. High resolution mass spectra (HRMS) were performed on Thermo Q-Exactive Focus (FTMS+c ESI) and data were reported as (m/z). Infrared spectra (IR) were recorded on Bruker Tensor II spectrometer with Plantium ATR accessory and the peaks are reported as absorption maxima ( $\nu$ ,  $\text{cm}^{-1}$ ). Optical rotations were measured on Rudolph Research Analytic Automatic Polarimeter, and reported as follows:  $[\alpha]_{\text{D}}^{\text{T}}$  (c: g/100 mL, in  $\text{CH}_2\text{Cl}_2$ ). Melting point ranges were determined on OptiMelt. X-ray crystallographic data were collected by a Bruker D8 Venture Photon II.

The experiments requiring substrates azlactone<sup>1</sup>, chiral guanidine<sup>1,2</sup> were synthesized according to known procedures and purified by recrystallization prior to use. All of the starting materials were purchased from TCI, Aladdin, Adamas, Acros, Aldrich and other companies, and used without further purification. All the solvents including toluene, tetrahydrofuran, diethyl ether, dichloromethane, chloroform, 1,2-dichloroethane, ethyl acetate, acetonitrile and so on were pre-dried over appropriate desiccants, and distilled prior to use. Reactions were monitored using thin-layer chromatography (TLC) on GF254 silica gel. Visualization of the developed plates was performed under UV light (254 nm) or using iodine, cobalt thiocyanate or  $\text{KMnO}_4$ . The products were purified by flash column chromatography with silicycle 300-400 mesh silica gel.

## 2. General procedure for the preparation of the substrates

### 2.1 General procedure for the preparation of $\alpha$ -imino amide

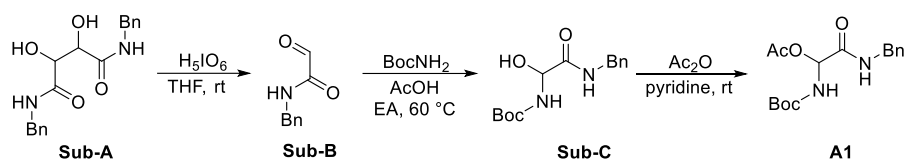

$\alpha$ -Imino amide was prepared using a modified literature procedure<sup>3,4</sup>. Periodic acid (12 mmol, 1.2 equiv) was added to a solution of **Sub-A** (10 mmol) in 20 mL THF at room temperature (rt). After stirring for 4 h, the formed precipitate was filtered, and THF was removed in *vacuo* below 30 °C. Crude **Sub-B** could be purified by flash column chromatography (ethyl acetate as eluent,  $R_f = 0.7$ , > 99% yield).

Under N<sub>2</sub>, **Sub-B** (13 mmol, 1.3 equiv) was added to a solution of BocNH<sub>2</sub> (10 mmol) and EtOAc (20 mL), additional acetic acid (1 mmol, 0.1 equiv) was added as a catalyst. The mixture reacted at 60 °C for 12 h and then solvent was removed in *vacuo*, and pure hemiaminal **Sub-C** was obtained through flash column chromatography (petroleum ether/ethyl acetate = 2/1, v/v as eluent,  $R_f = 0.5$ , 65% yield).

Finally, **Sub-C** dissolved in Ac<sub>2</sub>O (10 mL) with pyridine (13 mol%) as a catalyst was stirring overnight. Acetic anhydride was removed in *vacuo* at 70 °C, and  $\alpha$ -imino amide **A1** was purified by flash column chromatography (petroleum ether/ethyl acetate = 1/1, v/v as eluent,  $R_f = 0.5$ , >99% yield) and recrystallization in DCM/PE.

### 3. General procedures for the preparation of the products

#### General procedure 1: Preparation of racemic product **C**

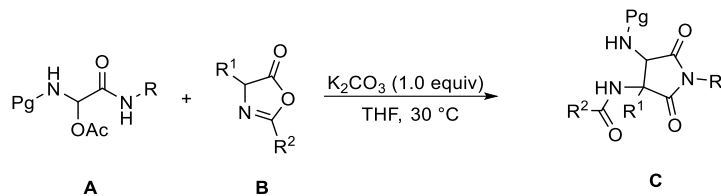

An oven-dried test tube was charged with  $\text{K}_2\text{CO}_3$  (0.1 mmol), **A** (0.10 mmol), **B** (0.1 mmol) in THF (1 mL). The resulted solution was stirred at 30 °C in a water bath for 12 h. The reaction mixture was subjected to flash column chromatography on silica gel and eluted with petroleum ether/ethyl acetate (5/1 and 3/1, v/v) to afford the corresponding racemic product **C**.

#### General procedure 2: Preparation of enantioenriched product **C**

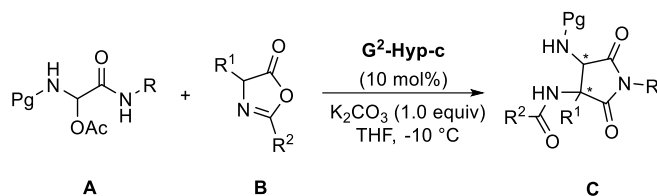

An oven-dried test tube was charged with the catalyst **G<sup>2</sup>-Hyp-c** (10 mol %), **A** (0.12 mmol), **B** (0.1 mmol),  $\text{K}_2\text{CO}_3$  (0.1 mmol), THF (1 mL) under  $\text{N}_2$  atmosphere. The resulted solution was stirred at -10 °C for 36-48h. After the reaction was completed analyzed by TLC, flash filtration with a thin silica gel was performed so that dr value could be determined by  $^1\text{H}$  NMR analysis. The crude product mixture was then subjected to flash column chromatography on silica gel and eluted with petroleum ether/ethyl acetate (5/1 and 3/1, v/v) to afford the corresponding pure product **C**.

## 4. Scope limitation

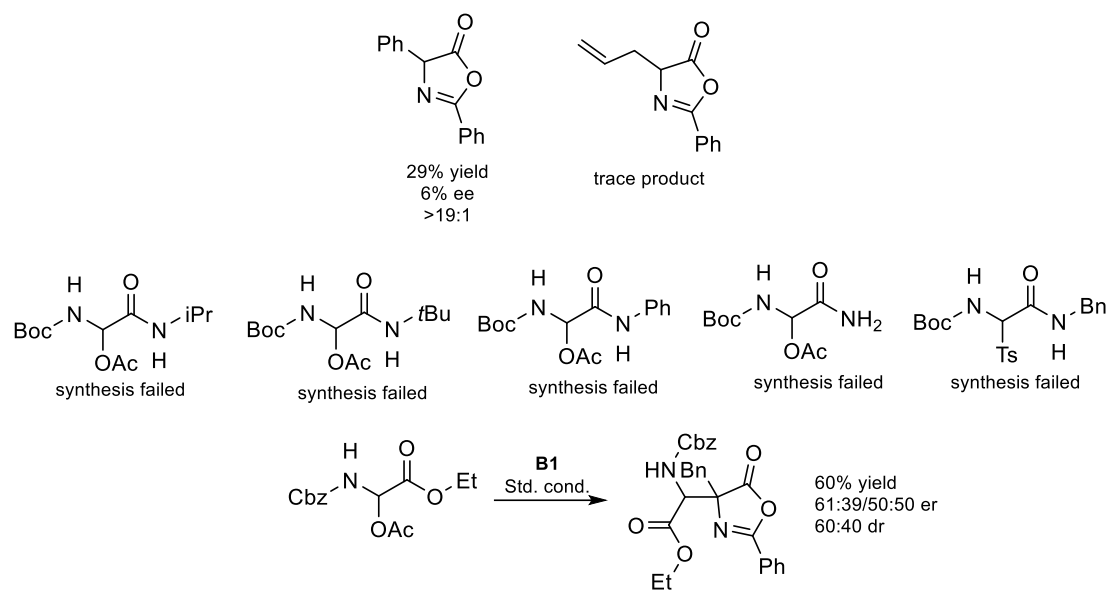

## 5. Optimization of the reaction conditions

**Table S1.** Screening of chiral guanidine.

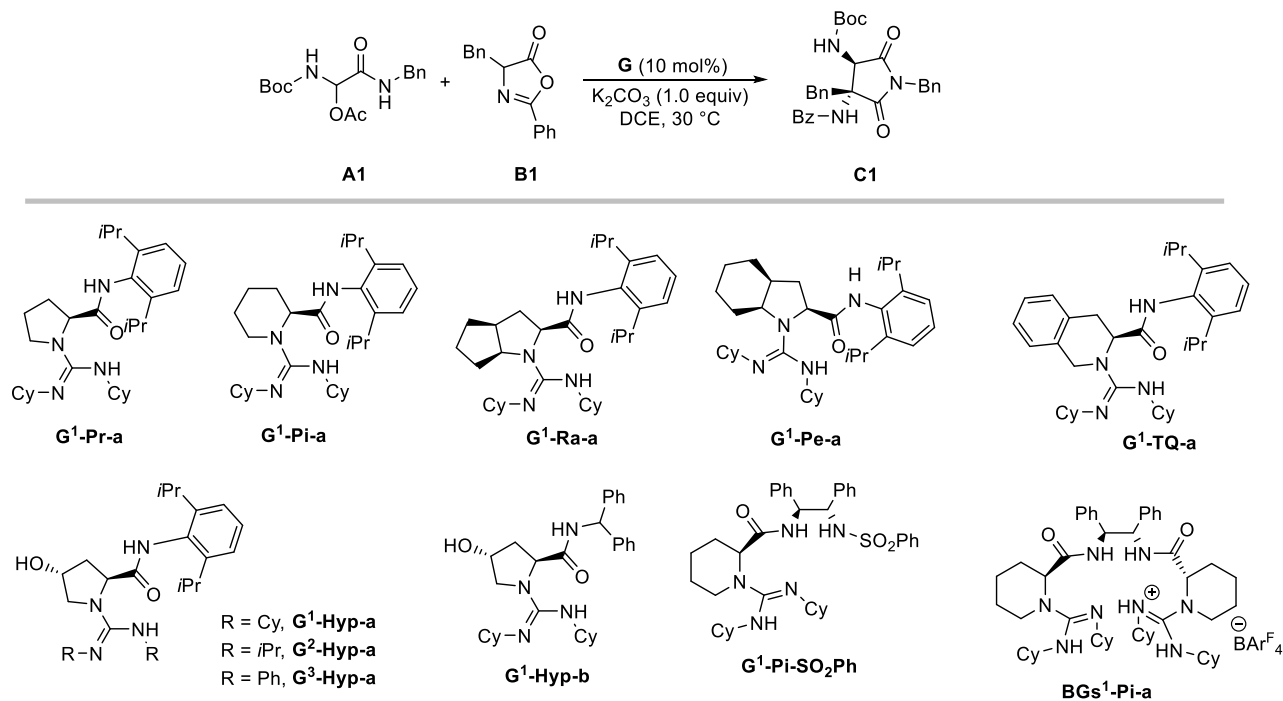

| entry <sup>a</sup> | <b>G</b>                  | yield (%) <sup>b</sup> | er <sup>c</sup> | dr <sup>d</sup> |
|--------------------|---------------------------|------------------------|-----------------|-----------------|
| 1                  | <b>G<sup>1</sup>-Pr-a</b> | 97                     | 59:41/50:50     | 60:40           |
| 2                  | <b>G<sup>1</sup>-Pi-a</b> | 97                     | 60:40/54:46     | 51:49           |

|    |                                          |    |             |       |
|----|------------------------------------------|----|-------------|-------|
| 3  | <b>G<sup>1</sup>-Ra-a</b>                | 98 | 54:46/51:49 | 62:38 |
| 4  | <b>G<sup>1</sup>-Pe-a</b>                | 91 | 58:42/54:46 | 58:42 |
| 5  | <b>G<sup>1</sup>-TQ-a</b>                | 96 | 56:44/52:48 | 43:57 |
| 6  | <b>BGs<sup>1</sup>-Pi-a</b>              | 86 | 28:72/58:42 | 57:43 |
| 7  | <b>G<sup>1</sup>-Pi-SO<sub>2</sub>Ph</b> | 93 | 19:81/56:46 | 40:60 |
| 8  | <b>G<sup>1</sup>-Hyp-a</b>               | 99 | 71:29/55:45 | 75:25 |
| 9  | <b>G<sup>2</sup>-Hyp-a</b>               | 88 | 73:27/59:41 | 85:15 |
| 10 | <b>G<sup>3</sup>-Hyp-a</b>               | 83 | 54:46/55:45 | 62:38 |
| 11 | <b>G<sup>1</sup>-Hyp-b</b>               | 96 | 72:28/51:49 | 70:30 |

<sup>a</sup>The reactions were performed with **A1** (0.10 mmol), **B1** (0.10 mmol), K<sub>2</sub>CO<sub>3</sub> (0.1 mmol) and **G** (10 mol %) in DCE (0.1 M) at 30 °C for 16 h. <sup>b</sup>Yield of the isolated product. <sup>c</sup>Determined by SFC analysis on a chiral stationary phase. <sup>d</sup>Determined by <sup>1</sup>H NMR analysis.

**Table S2.** Screening of solvent.

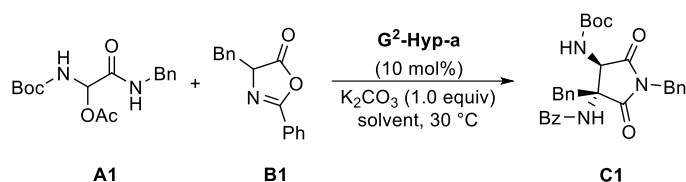

| entry <sup>a</sup> | solvent           | yield (%) <sup>b</sup> | er (%) <sup>c</sup> | dr <sup>d</sup> |
|--------------------|-------------------|------------------------|---------------------|-----------------|
| 1                  | toluene           | 83                     | 79:21/58:42         | 76:24           |
| 2                  | Et <sub>2</sub> O | 67                     | 81:9/53:47          | 74:26           |
| 3                  | EA                | 81                     | 78:22/51:49         | 78:22           |
| 4                  | DCM               | 92                     | 71:29/58:42         | 78:22           |
| 5                  | CHCl <sub>3</sub> | 65                     | 71:29/61:39         | 74:26           |
| 6                  | DCE               | 88                     | 73:27/59:41         | 85:15           |
| 7 <sup>e</sup>     | DCE               | 98                     | --                  | 63:37           |
| 8 <sup>f</sup>     | DCE               | trace                  | --                  | --              |
| 9                  | THF               | 97                     | 80:20/53:47         | 85:15           |
| 10 <sup>e</sup>    | THF               | 91                     | --                  | 77:23           |
| 11 <sup>f</sup>    | THF               | 66                     | --                  | 88:12           |
| 12                 | 2-MeTHF           | 97                     | 84:16/54:46         | 85:15           |

<sup>a</sup>The reactions were performed with **A1** (0.10 mmol), **B1** (0.10 mmol), K<sub>2</sub>CO<sub>3</sub> (0.1 mmol) and **G<sup>2</sup>-Hyp-a** (10 mol %) in solvent (0.1 M) at 30 °C for 16 h. <sup>b</sup>Yield of the isolated product. <sup>c</sup>Determined by SFC analysis on a chiral stationary phase. <sup>d</sup>Determined by <sup>1</sup>H NMR analysis; <sup>e</sup>Without **G<sup>2</sup>-Hyp-a**; <sup>f</sup>Without **G<sup>2</sup>-Hyp-a** and K<sub>2</sub>CO<sub>3</sub>.

**Table S3.** Temperature Screening.

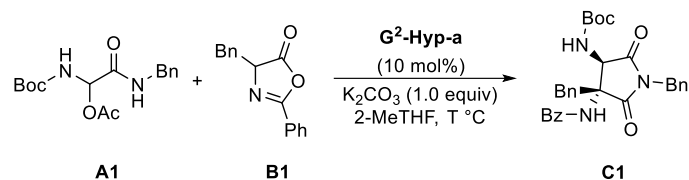

| entry <sup>a</sup> | T (°C) | yield (%) <sup>b</sup> | er (%) <sup>c</sup> | dr <sup>d</sup> |
|--------------------|--------|------------------------|---------------------|-----------------|
| 1                  | 30     | 99                     | 83:17/53:47         | 82:18           |
| 2                  | 10     | >99                    | 86:14/53:47         | 85:15           |
| 3                  | 0      | 90                     | 86:14/54:46         | 84:16           |
| 4                  | -10    | 94                     | 87:13/52:48         | 89:11           |
| 5                  | -20    | 82                     | 87:13/52:48         | 86:14           |
| 6                  | -30    | 42                     | 81:19/51:49         | 83:17           |
| 7                  | -50    | 35                     | 66:34/51:49         | 78:22           |

<sup>a</sup>The reactions were performed with **A1** (0.10 mmol), **B1** (0.10 mmol), K<sub>2</sub>CO<sub>3</sub> (0.1 mmol) and **G<sup>2</sup>-Hyp-a** (10 mol %) in solvent (0.1 M) for 16 h. <sup>b</sup>Yield of the isolated product. <sup>c</sup>Determined by SFC analysis on a chiral stationary phase. <sup>d</sup>Determined by <sup>1</sup>H NMR analysis.

**Table S4.** Screening of base.

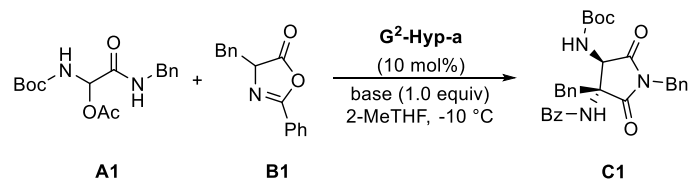

| entry <sup>a</sup> | base                                              | yield (%) <sup>b</sup> | er (%) <sup>c</sup> | dr <sup>d</sup> |
|--------------------|---------------------------------------------------|------------------------|---------------------|-----------------|
| 1                  | Na <sub>2</sub> CO <sub>3</sub>                   | 83                     | 88:12/47:53         | 88:12           |
| 2                  | CS <sub>2</sub> CO <sub>3</sub>                   | 73                     | 79:21/54:46         | 75:25           |
| 3                  | K <sub>3</sub> PO <sub>4</sub> ·7H <sub>2</sub> O | 90                     | 82:18/53:47         | 84:16           |
| 4                  | K <sub>2</sub> HPO <sub>4</sub>                   | 97                     | 87:13/52:48         | 86:14           |
| 5                  | KH <sub>2</sub> PO <sub>4</sub>                   | 58                     | 88:12/53:47         | 84:16           |
| 6                  | Na <sub>3</sub> PO <sub>4</sub>                   | 88                     | 85:15/54:5          | 88:12           |
| 7                  | DMAP                                              | 72                     | 66:34/53:47         | 58:42           |
| 8                  | <i>t</i> BuOK                                     | 73                     | 64:36/50:50         | 82:18           |
| 9                  | <i>i</i> Pr <sub>2</sub> NEt                      | 85                     | 86:14/51:49         | 84:16           |
| 10                 | <i>i</i> Pr <sub>2</sub> NH                       | 65                     | 80:20/52:48         | 82:18           |
| 11                 | Et <sub>3</sub> N                                 | 87                     | 83:17/53:47         | 85:15           |

<sup>a</sup>The reactions were performed with **A1** (0.10 mmol), **B1** (0.10 mmol), base (0.1 mmol) and **G<sup>2</sup>-Hyp-a** (10 mol %) in 2-MeTHF (0.1 M) at -10 °C for 16 h. <sup>b</sup>Yield of the isolated product. <sup>c</sup>Determined by SFC analysis on a chiral stationary phase. <sup>d</sup>Determined by <sup>1</sup>H NMR analysis.

**Table S5.** Screening of substrates ratio.



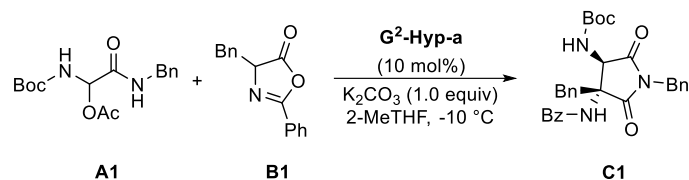

| entry <sup>a</sup> | <b>A1</b> (X mmol) | <b>B1</b> (Y mmol) | yield (%) <sup>b</sup> | er (%) <sup>c</sup> | dr <sup>d</sup> |
|--------------------|--------------------|--------------------|------------------------|---------------------|-----------------|
| 1                  | 0.12               | 0.1                | 93                     | 87:13/53:47         | 84:16           |
| 2                  | 0.1                | 0.1                | 84                     | 87:13/52:48         | 83:17           |
| 3                  | 0.1                | 0.12               | 87                     | 87:13/53:47         | 85:15           |

<sup>a</sup>The reactions were performed with **A1** (X mmol), **B1** (Y mmol),  $K_2CO_3$  (0.1 mmol) and **G<sup>2</sup>-Hyp-a** (10 mol %) in 2-MeTHF (0.1 M) at  $-10\text{ }^\circ\text{C}$  for 16 h. <sup>b</sup>Yield of the isolated product. <sup>c</sup>Determined by SFC analysis on a chiral stationary phase. <sup>d</sup>Determined by  $^1\text{H}$  NMR analysis.

**Table S6.** Screening of catalyst loading.

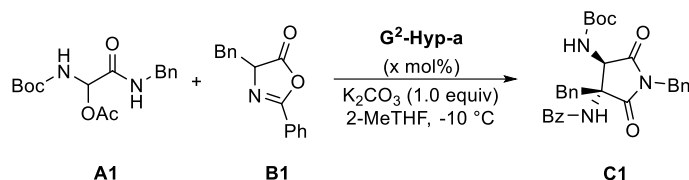

| entry <sup>a</sup> | X (mol%) | yield (%) <sup>b</sup> | er (%) <sup>c</sup> | dr <sup>d</sup> |
|--------------------|----------|------------------------|---------------------|-----------------|
| 1                  | 7.5      | 90                     | 86:14/53:47         | 82:18           |
| 2                  | 10       | 88                     | 87:13/53:47         | 86:14           |
| 3                  | 12.5     | 88                     | 87:13/53:47         | 89:11           |
| 4                  | 15       | 89                     | 87:13/53:47         | 85:15           |

<sup>a</sup>The reactions were performed with **A1** (0.12 mmol), **B1** (0.10 mmol),  $K_2CO_3$  (0.1 mmol) and **G<sup>2</sup>-Hyp-a** (X mol %) in 2-MeTHF (0.1 M) at  $-10\text{ }^\circ\text{C}$  for 16 h. <sup>b</sup>Yield of the isolated product. <sup>c</sup>Determined by SFC analysis on a chiral stationary phase. <sup>d</sup>Determined by  $^1\text{H}$  NMR analysis.

**Table S7.** Rescreening of chiral guanidines.

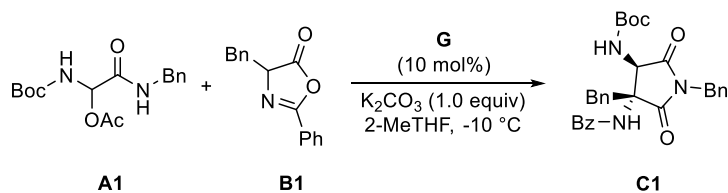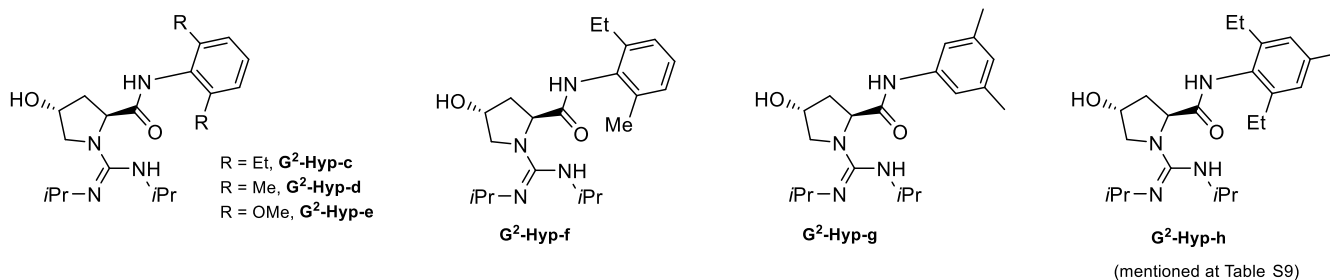

| entry <sup>a</sup> | <b>G</b>                   | yield (%) <sup>b</sup> | er (%) <sup>c</sup> | dr <sup>d</sup> |
|--------------------|----------------------------|------------------------|---------------------|-----------------|
| 1                  | <b>G<sup>2</sup>-Hyp-c</b> | 88                     | 91:8/60:40          | 91:9            |
| 2                  | <b>G<sup>2</sup>-Hyp-d</b> | >99                    | 88:12/58:45         | 86:14           |
| 3                  | <b>G<sup>2</sup>-Hyp-e</b> | >99                    | 66:34/50:50         | 70:30           |
| 4                  | <b>G<sup>2</sup>-Hyp-f</b> | 64                     | 77:23/54:46         | 83:17           |
| 5                  | <b>G<sup>2</sup>-Hyp-g</b> | >99                    | 50:50/50:50         | 57:43           |

<sup>a</sup>The reactions were performed with **A1** (0.12 mmol), **B1** (0.10 mmol), K<sub>2</sub>CO<sub>3</sub> (0.1 mmol) and **G** (10 mol %) in 2-MeTHF (0.1 M) at -10 °C for 16 h. <sup>b</sup>Yield of the isolated product. <sup>c</sup>Determined by SFC analysis on a chiral stationary phase. <sup>d</sup>Determined by <sup>1</sup>H NMR analysis.

**Table S8.** Screening of K<sub>2</sub>CO<sub>3</sub> loading.

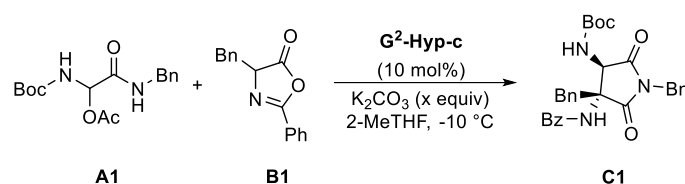

| entry <sup>a</sup> | K <sub>2</sub> CO <sub>3</sub> (equiv) | yield (%) <sup>b</sup> | er (%) <sup>c</sup> | dr <sup>d</sup> |
|--------------------|----------------------------------------|------------------------|---------------------|-----------------|
| 1                  | 1.5                                    | 76                     | 90:10/56:44         | 89:11           |
| 2                  | 1.0                                    | 87                     | 91:9/58:42          | 89:11           |
| 3                  | 0.5                                    | 79                     | 91:9/57:43          | 87:13           |
| 4 <sup>e</sup>     | 0                                      | 75                     | 92:8/59:41          | 91:9            |

<sup>a</sup>The reactions were performed with **A1** (0.12 mmol), **B1** (0.10 mmol), K<sub>2</sub>CO<sub>3</sub> (X equiv) and **G<sup>2</sup>-Hyp-c** (10 mol %) in 2-MeTHF (0.1 M) at -10 °C for 16 h. <sup>b</sup>Yield of the isolated product. <sup>c</sup>Determined by SFC analysis on a chiral stationary phase. <sup>d</sup>Determined by <sup>1</sup>H NMR analysis. <sup>e</sup>Reaction time was 60 h

**Table S9.** Rescreening of chiral guanidine and solvent.

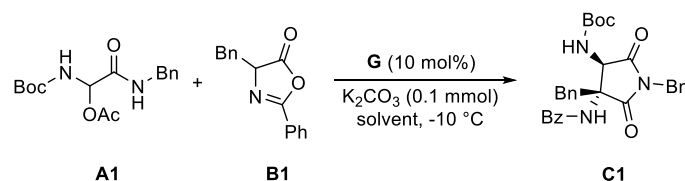

| entry <sup>a</sup> | <b>G</b>                   | solvent | yield (%) <sup>b</sup> | er (%) <sup>c</sup> | dr <sup>d</sup> |
|--------------------|----------------------------|---------|------------------------|---------------------|-----------------|
| 1                  | <b>G<sup>2</sup>-Hyp-c</b> | 2-MeTHF | 87                     | 91:9/58:42          | 89:11           |
| 2                  | <b>G<sup>2</sup>-Hyp-c</b> | THF     | 93                     | 90:10/58:42         | 94:6            |
| 3                  | <b>G<sup>2</sup>-Hyp-h</b> | THF     | 91                     | 83:17/53:47         | 84:16           |
| 4 <sup>e</sup>     | <b>G<sup>2</sup>-Hyp-c</b> | THF     | 88                     | 91:9                | >19:1           |
| 5                  | <b>None</b>                | THF     | 44                     | --                  | 75:25           |

<sup>a</sup>The reactions were performed with **A1** (0.12 mmol), **B1** (0.10 mmol), K<sub>2</sub>CO<sub>3</sub> (0.1 mmol) and **G** (10 mol %) in solvent (0.1 M) at -10 °C for 16 h. <sup>b</sup>Yield of the isolated product. <sup>c</sup>Determined by SFC analysis on a chiral stationary phase. <sup>d</sup>Determined by <sup>1</sup>H NMR analysis. <sup>e</sup>Minor diastereoisomer was removed by flash column chromatography.



## 6. Gram-scale synthesis

### Gram-scale synthesis of **C1**

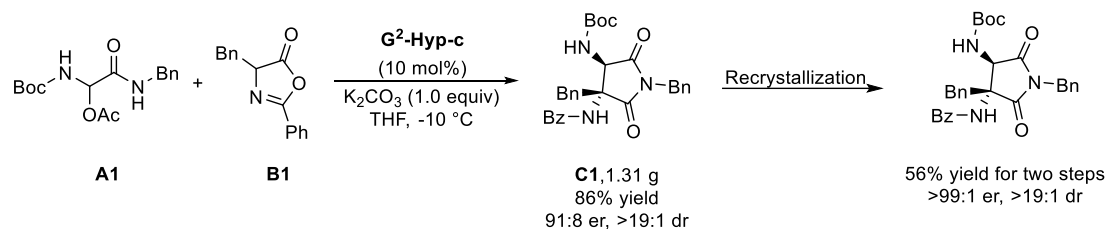

An oven-dried round-bottom flask was charged with catalyst **G<sup>2</sup>-Hyp-c** (10 mol %), **A1** (3.6 mmol), **B1** (3 mmol),  $\text{K}_2\text{CO}_3$  (3 mmol) and stir bar under  $\text{N}_2$  atmosphere. After the flask was cooled to  $-10\text{ }^\circ\text{C}$ , THF (30 mL) was added when the reaction was stirring. The resulted solution was stirred at  $-10\text{ }^\circ\text{C}$  for 16 h. The reaction mixture was filtered, and concentrated under reduced pressure, the crude product was subjected to flash column chromatography on silica gel and eluted with petroleum ether/ethyl acetate (5/1 and 3/1, v/v) to afford the corresponding product **C1** (1.31 g, 86% yield, 91:8 er).

Obtained **C1** was dissolved in 20 mL DCM, 80 mL petroleum ether was added and slightly shaken the bottom to sure complete mixing. Evaporating solvent slowly at rt for 3 days, no crystal was observed. So additional 80 mL petroleum ether was added and colorless crystal was observed with slow evaporation. When the crystal stopped growing, optically pure **C1** was obtained by filtration, in the meantime, er of filtrate was 59:41.

**Significant Self-disproportionation of enantiomers (SDE) was not observed in the flash chromatography separation.** The products of the first four tubes, the next four tubes, and all were obtained in 90:10 er, 91:9 er, 92:8 er, separately.

## 7. Further transformations of the products

### Procedure 1 De-protection of the compound **C1**

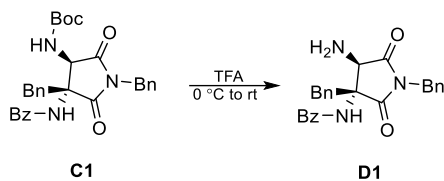

In an ice water bath, 3 mL TFA was slowly added to a tube charged with **C1** (0.3 mmol, >99:1 er). The mixture was stirring at rt overnight. After the reaction was completed analyzed by TLC, 2 M NaOH (aq) was added at 0 °C and stirred the mixture to sure aqueous phase was basic. Washing aqueous phase with 1-2 mL DCM three times, separating and concentrating organic phase, the crude product was subjected to column chromatography on silica gel and eluted with petroleum ether/ethyl acetate (1/1, v/v) to afford the desired product **D1** (94% yield, >99:1 er).

### Procedure 2 Reduction of the compound **D1**

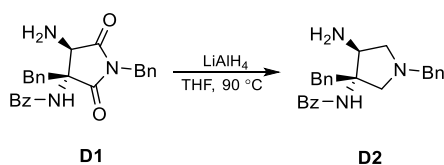

Under N<sub>2</sub>, 2 mL anhydrous THF was added to the mixture of **D1** (0.2 mmol, >99:1 er) and LiAlH<sub>4</sub> (0.8 mmol, 4 equiv) in a tube. This mixture was heated to 90 °C and stirring for 4 h. After the reaction was completed analyzed by TLC, hydrated sodium sulfate was added to quench reaction until no more bubble was generated. Pure **D2** was obtained by column chromatography on silica gel (55% yield, >99:1 er, ethyl acetate/MeOH, 10/1, v/v).

### Procedure 3 Partly reduction of the compound **C1**

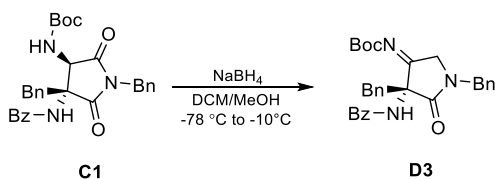

Under N<sub>2</sub>, 3 mL anhydrous DCM/MeOH (1/1, v/v) was added to a tube charged with **C1** (0.3 mmol, >99:1 er) and this mixture was cold to -78 °C. NaBH<sub>4</sub> (0.39 mmol, 1.3 equiv) was added and warming mixture to -10 °C. After stirring at -10 °C overnight, solvent was removed in *vacuo* and pure **D3** was obtained by column chromatography on silica gel (90% yield, >99:1 er, petroleum ether/ethyl acetate, 5/1, v/v).

## 8. Determination of absolute configurations of compounds

### Determination of absolute configuration of compound C1

The colourless crystal in block-shape, with approximate dimensions of  $0.182 \times 0.340 \times 0.409 \text{ mm}^3$ , was selected and mounted for the single-crystal X-ray diffraction. The data set was collected by Bruker D8 Venture Photon II diffractometer at 173(2)K equipped with micro-focus Cu radiation source ( $K_\alpha = 1.54178\text{\AA}$ ). Applied with face-indexed numerical absorption correction, the structure solution was solved and refinement was processed by SHELXTL (version 6.14) and OLEX 2.3 program package<sup>5, 6, 7, 8</sup>. The structure was analyzed by ADDSYM routine implemented in PLATON suite and no higher symmetry was suggested<sup>9</sup>.

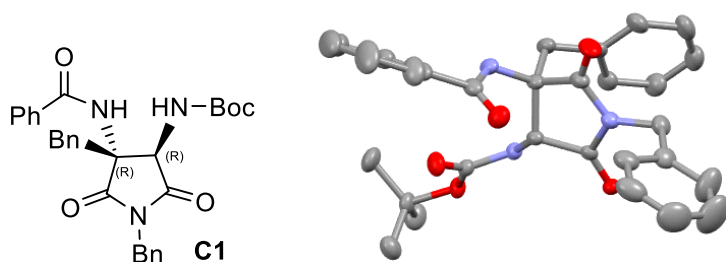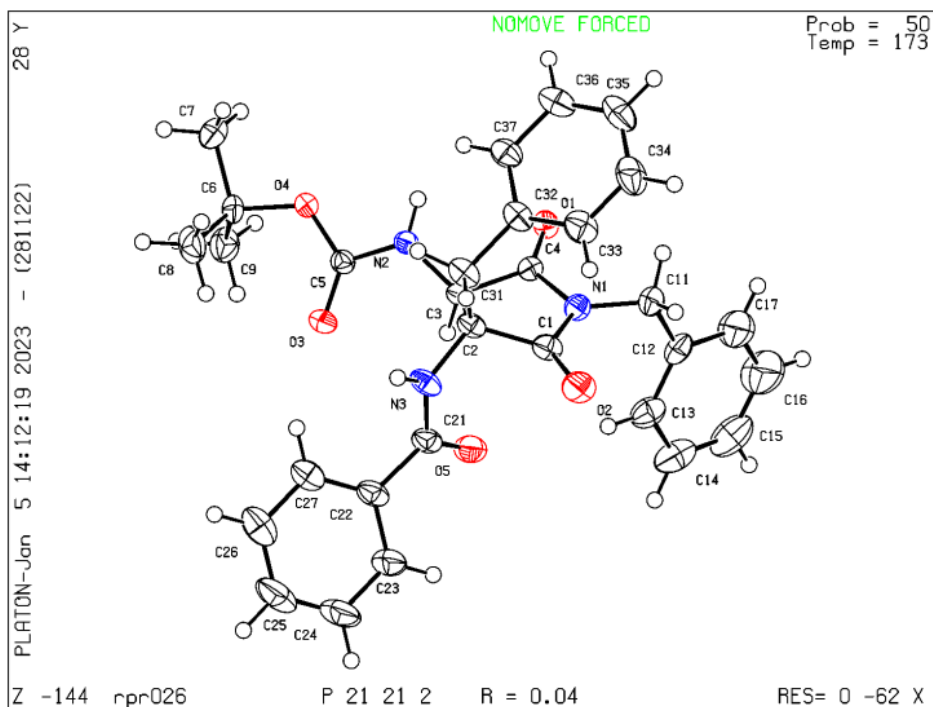

Figure S1. the thermal ellipsoid figure of C1 with 50% probabilities

Crystallographic Data for C<sub>30</sub>H<sub>31</sub>N<sub>3</sub>O<sub>5</sub>.

|                                                   |                                                               |
|---------------------------------------------------|---------------------------------------------------------------|
| Formula                                           | C <sub>30</sub> H <sub>31</sub> N <sub>3</sub> O <sub>5</sub> |
| Formula mass (amu)                                | 513.58                                                        |
| Space group                                       | P 21 21 2                                                     |
| <i>a</i> (Å)                                      | 11.3754(3)                                                    |
| <i>b</i> (Å)                                      | 21.9762(6)                                                    |
| <i>c</i> (Å)                                      | 11.2116(3)                                                    |
| $\alpha$ (deg)                                    | 90                                                            |
| $\beta$ (deg)                                     | 90                                                            |
| $\gamma$ (deg)                                    | 90                                                            |
| <i>V</i> (Å <sup>3</sup> )                        | 2802.77(13)                                                   |
| <i>Z</i>                                          | 4                                                             |
| $\lambda$ (Å)                                     | 1.54178                                                       |
| <i>T</i> (K)                                      | 173(2)                                                        |
| $\rho_{\text{calcd}}$ (g cm <sup>-3</sup> )       | 1.217                                                         |
| $\mu$ (mm <sup>-1</sup> )                         | 0.679                                                         |
| Transmission factors                              | 0.706–1.000                                                   |
| $2\theta_{\text{max}}$ (deg)                      | 68.288                                                        |
| No. of unique data, including $F_o^2 < 0$         | 5087                                                          |
| No. of unique data, with $F_o^2 > 2\sigma(F_o^2)$ | 4949                                                          |
| No. of variables                                  | 355                                                           |
| $R(F)$ for $F_o^2 > 2\sigma(F_o^2)$ <sup>a</sup>  | 0.0413                                                        |
| $R_w(F_o^2)$ <sup>b</sup>                         | 0.0979                                                        |
| Goodness of fit                                   | 1.070                                                         |

$$^a R(F) = \sum ||F_o| - |F_c|| / \sum |F_o|.$$

$$^b R_w(F_o^2) = [\sum [w(F_o^2 - F_c^2)^2] / \sum wF_o^4]^{1/2}; w^{-1} = [\sigma^2(F_o^2) + (Ap)^2 + Bp], \text{ where } p = [\max(F_o^2, 0) + 2F_c^2] / 3.$$

## 9. Computational details

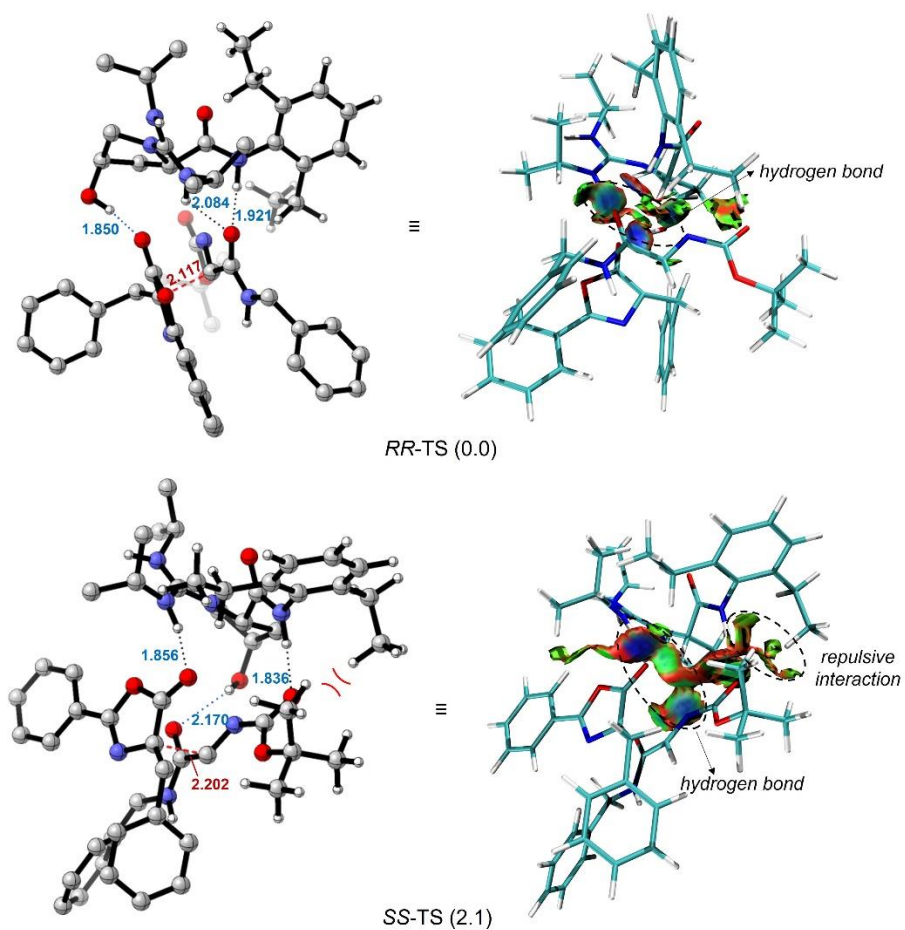

**Figure S2.** Optimized geometries and non-covalent interaction analysis of **RR-TS** and **SS-TS**. The relative Gibbs free energy ( $\Delta G$ ) is given in kcal mol<sup>-1</sup> and the bond length is shown in Ångström.

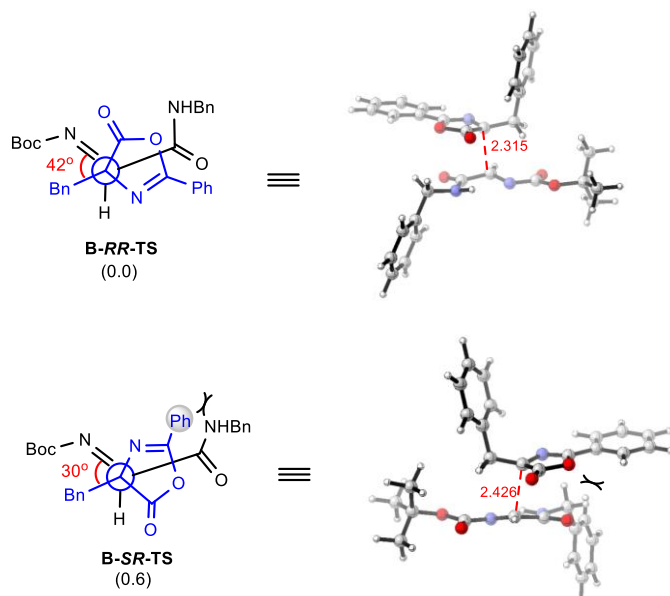

**Figure S3.** Optimized geometries and non-covalent interaction analysis of **B-RR-TS** and **B-SR-TS**. The relative Gibbs free energy ( $\Delta G$ ) is given in kcal mol<sup>-1</sup> and the bond length is shown in Ångström.



All calculations were performed using Gaussian 09 program package<sup>10</sup>, employing the M06-2X density functional<sup>11</sup> with the 6-31G\* basis set<sup>12-13</sup>. Geometries were optimized in THF solvent and characterized by frequency analysis at 263 K. The self-consistent reaction field (SCRF) method based on the universal solvation model PCM<sup>14</sup> was adopted to evaluate the effect of solvent. All single-point energies were computed by using M06-2X density functional with the 6-311G\*\* basis set<sup>15-16</sup>, and Gibbs free energies were obtained by Shermo 2.3 program<sup>17</sup>. The non-covalent interaction analysis for transition state was performed using Multiwfn 3.8(dev) program<sup>18</sup> with IGMH method<sup>19</sup>, and the isosurface plots were generated by VMD 1.9.3<sup>20</sup>. The three-dimensional structures were generated using CYLView20<sup>21</sup>.

## Cartesian coordinates of all structures.

### RR-TS

|   |             |             |             |
|---|-------------|-------------|-------------|
| N | -3.83807802 | 0.29939900  | -3.25579501 |
| H | -3.59367001 | -0.32438500 | -4.01473302 |
| N | -1.94994701 | -0.47825100 | -2.13745801 |
| N | -3.02289201 | 1.43436301  | -1.39954901 |
| C | -2.93438401 | 0.40398800  | -2.26506701 |
| C | -3.37935002 | 2.80353601  | -1.81092801 |
| H | -3.16274001 | 2.94564202  | -2.87167201 |
| H | -4.43528502 | 3.02131801  | -1.61431901 |
| C | -2.46901001 | 3.65658802  | -0.92067000 |
| C | -2.49633001 | 2.87975501  | 0.39327600  |
| H | -3.44826501 | 3.04598801  | 0.90703600  |
| H | -1.67804001 | 3.13240602  | 1.06973001  |
| C | -2.42182901 | 1.41493001  | -0.03873700 |
| H | -1.38686600 | 1.07066400  | -0.05623300 |
| H | -2.86245101 | 4.67046302  | -0.81787800 |
| O | -4.36671602 | 0.87138701  | 1.27364901  |
| C | -3.28546501 | 0.50098300  | 0.83775701  |
| N | -2.77908801 | -0.74702600 | 0.98494401  |
| C | -3.44706001 | -1.80232601 | 1.66585101  |
| C | -4.71274402 | -2.23709501 | 1.23918301  |
| C | -5.31512301 | -3.29427602 | 1.92867201  |
| H | -6.29216903 | -3.64190301 | 1.60076301  |
| C | -4.68102302 | -3.91967202 | 2.99356301  |
| H | -5.16336103 | -4.74475102 | 3.50868702  |
| C | -3.41489701 | -3.49273501 | 3.38348901  |
| H | -2.90415201 | -3.98310202 | 4.20854902  |
| C | -2.78259001 | -2.43439301 | 2.73356501  |
| H | -1.79482401 | -0.87162200 | 0.73177500  |
| C | -5.24952402 | 0.71826300  | -3.19264501 |
| C | -6.14728105 | -0.50732600 | -3.35420301 |
| C | -5.55946101 | 1.76001101  | -4.26404902 |
| H | -5.39978300 | 1.13785701  | -2.19339601 |
| H | -5.96366804 | -1.24376600 | -2.56799001 |
| H | -7.19760304 | -0.20603100 | -3.30779601 |
| H | -5.97734002 | -0.98299900 | -4.32732602 |

|   |             |             |             |
|---|-------------|-------------|-------------|
| H | -4.93229902 | 2.64797501  | -4.16449302 |
| H | -5.39688602 | 1.33306701  | -5.25959502 |
| H | -6.60711504 | 2.06523901  | -4.19404102 |
| C | -1.83917001 | -1.84270801 | -2.67981801 |
| C | -1.54550201 | -1.87477501 | -4.18117802 |
| C | -3.02607701 | -2.71440201 | -2.28149501 |
| H | -0.95546300 | -2.22386801 | -2.16160001 |
| H | -0.76543100 | -1.15363401 | -4.43867302 |
| H | -1.19925900 | -2.87463001 | -4.45783502 |
| H | -2.43040101 | -1.67003801 | -4.79477302 |
| H | -3.14459401 | -2.71879501 | -1.19376101 |
| H | -3.95978902 | -2.36586701 | -2.73481301 |
| H | -2.85273801 | -3.73993801 | -2.61969401 |
| C | -5.44298402 | -1.65628001 | 0.04785800  |
| C | -6.73599403 | -0.92962101 | 0.42815100  |
| H | -5.68448801 | -2.48510301 | -0.63200800 |
| H | -4.78699402 | -0.98007901 | -0.50999800 |
| H | -7.22941104 | -0.52965900 | -0.46448400 |
| H | -7.43628805 | -1.61261701 | 0.91951700  |
| H | -6.51418205 | -0.10421000 | 1.10601000  |
| C | -1.43162600 | -1.95484601 | 3.21018302  |
| C | -1.54344901 | -0.71532000 | 4.10266102  |
| H | -0.78244800 | -1.72063801 | 2.36027201  |
| H | -0.94874300 | -2.76703201 | 3.76466802  |
| H | -0.55071700 | -0.38546400 | 4.42704602  |
| H | -2.00917601 | 0.11457400  | 3.56360402  |
| H | -2.14329601 | -0.93485300 | 4.99200602  |
| O | -1.17266501 | 3.77849501  | -1.46267601 |
| H | -0.72421400 | 2.90822601  | -1.45724701 |
| H | -1.14442000 | -0.17408100 | -1.59202801 |
| O | 0.27492100  | 1.37503200  | -1.72911301 |
| O | 2.15663901  | 0.15154400  | -2.04899501 |
| N | 3.43853302  | 0.80069701  | -0.32900200 |
| C | 1.40008000  | 1.07215100  | -1.34587201 |
| C | 2.17671501  | 1.40038601  | -0.17754700 |
| C | 3.35853702  | 0.07329700  | -1.38677201 |
| C | 4.37139402  | -0.81732200 | -1.95158301 |
| C | 4.18120802  | -1.41008700 | -3.20573202 |
| C | 5.16652602  | -2.23669601 | -3.73838202 |
| C | 6.33784703  | -2.48177001 | -3.02368801 |
| C | 6.52346504  | -1.89741001 | -1.76948601 |
| C | 5.54697703  | -1.06743600 | -1.23331301 |
| C | 2.04925401  | 2.74562301  | 0.48407200  |
| C | 2.75498601  | 3.83332602  | -0.29619400 |
| C | 4.14046002  | 3.98706302  | -0.18738200 |

|   |             |             |             |
|---|-------------|-------------|-------------|
| C | 4.80731702  | 4.95861602  | -0.92800600 |
| C | 4.09519402  | 5.78998801  | -1.79167801 |
| C | 2.71494501  | 5.64312704  | -1.90521401 |
| C | 2.04725901  | 4.67126302  | -1.16119801 |
| H | 3.26955602  | -1.21153300 | -3.76020902 |
| H | 5.01888302  | -2.68907601 | -4.71390802 |
| H | 7.10336801  | -3.12880001 | -3.44049701 |
| H | 7.43173406  | -2.09265601 | -1.20820200 |
| H | 5.68019903  | -0.60491400 | -0.26016400 |
| H | 0.97902101  | 2.97267101  | 0.57340500  |
| H | 2.46095101  | 2.67576601  | 1.49683901  |
| H | 4.69589802  | 3.33322201  | 0.48058700  |
| H | 5.88341705  | 5.06920502  | -0.82987400 |
| H | 4.61370002  | 6.55038804  | -2.36796701 |
| H | 2.15159401  | 6.29026505  | -2.57140201 |
| H | 0.96761600  | 4.56618802  | -1.24453500 |
| C | 1.99629401  | -3.01524901 | -0.49314700 |
| H | 2.19601901  | -2.75075501 | -1.53982100 |
| O | -0.11081600 | -1.22850600 | -0.12186400 |
| O | -0.73290700 | 2.43025601  | 3.12182801  |
| O | 1.34426601  | 1.60659401  | 3.48595401  |
| N | 2.02226801  | -1.81578201 | 0.33543200  |
| N | 0.09628400  | 0.84337200  | 1.71053101  |
| C | 1.19177000  | 0.23044100  | 1.28655201  |
| C | 0.96994101  | -0.98934500 | 0.44027100  |
| C | 0.18001700  | 1.69049501  | 2.78687901  |
| C | 1.60740001  | 2.47515101  | 4.61979802  |
| C | 3.03367201  | 2.09987101  | 5.00934502  |
| C | 0.64466200  | 2.15781401  | 5.76077901  |
| C | 1.54512101  | 3.94499901  | 4.20951902  |
| H | 2.11162001  | 0.22661400  | 1.87679001  |
| H | 3.71977702  | 2.30119001  | 4.18039902  |
| H | 3.09196501  | 1.03673000  | 5.26141402  |
| H | 3.35209401  | 2.68401401  | 5.87754302  |
| H | -0.38355400 | 2.38768501  | 5.47883504  |
| H | 0.91497300  | 2.74987401  | 6.64100503  |
| H | 0.71556300  | 1.09806901  | 6.02725302  |
| H | 0.53335200  | 4.23266002  | 3.92430402  |
| H | 2.22282001  | 4.13565202  | 3.37037701  |
| H | 1.86778001  | 4.56524202  | 5.05182002  |
| H | 2.89809201  | -1.55550801 | 0.77262200  |
| C | 3.01187201  | -4.01142002 | 0.00742600  |
| C | 4.15132002  | -4.30436402 | -0.73947000 |
| C | 2.83082201  | -4.62425502 | 1.25124501  |
| C | 5.09978902  | -5.20404302 | -0.25368000 |

|   |            |             |             |
|---|------------|-------------|-------------|
| H | 4.29884002 | -3.82416702 | -1.70385001 |
| C | 3.77468802 | -5.52259201 | 1.73693901  |
| H | 1.94485401 | -4.39043602 | 1.83736901  |
| C | 4.91245002 | -5.81457400 | 0.98328700  |
| H | 5.98539601 | -5.42274204 | -0.84314400 |
| H | 3.62471602 | -5.99652905 | 2.70211601  |
| H | 5.64945902 | -6.51567602 | 1.36272500  |
| H | 0.98087100 | -3.41878002 | -0.43821900 |

Zero-point correction= 1.145236 (Hartree/Particle)

Thermal correction to Energy= 1.209559

Thermal correction to Enthalpy= 1.210503

Thermal correction to Gibbs Free Energy= 1.044700

### SS-TS

|   |             |             |             |
|---|-------------|-------------|-------------|
| O | -0.90882103 | 1.30799305  | 0.97474201  |
| C | -2.27478004 | 1.34805407  | 1.05951302  |
| N | -2.83842306 | 0.19561507  | 1.16962102  |
| C | -1.80235307 | -0.74721995 | 1.05222802  |
| C | -0.56415605 | -0.03089297 | 1.06300702  |
| O | 0.61427995  | -0.37712799 | 1.03989502  |
| C | -2.90757102 | 2.66443509  | 1.02987701  |
| C | -4.29633602 | 2.76153611  | 1.17924702  |
| C | -4.90970200 | 4.00748213  | 1.15034002  |
| C | -4.14556897 | 5.16185712  | 0.97336702  |
| C | -2.76445997 | 5.06458409  | 0.81685601  |
| C | -2.14288999 | 3.82008608  | 0.84156602  |
| C | -3.29972011 | -2.74147093 | 1.48466002  |
| C | -4.34295811 | -2.44072291 | 2.36642802  |
| C | -5.60122515 | -3.01276289 | 2.20694002  |
| C | -5.84726816 | -3.87905489 | 1.14238802  |
| C | -4.81752914 | -4.19058391 | 0.25969101  |
| C | -3.54928213 | -3.63664493 | 0.43974001  |
| C | -1.94067410 | -2.11180595 | 1.68874302  |
| H | -4.87846004 | 1.85315312  | 1.30885002  |
| H | -5.98679298 | 4.07997515  | 1.26451602  |
| H | -4.62781796 | 6.13420715  | 0.95062902  |
| H | -2.16990195 | 5.96069708  | 0.66807902  |
| H | -1.06894299 | 3.73584106  | 0.70251102  |
| H | -4.15792810 | -1.75463391 | 3.18926503  |
| H | -6.39238715 | -2.78277888 | 2.91506302  |
| H | -6.83204615 | -4.31659487 | 1.01011602  |
| H | -4.99175516 | -4.88106891 | -0.56004899 |
| H | -2.73707213 | -3.92611394 | -0.22340399 |
| H | -1.76329609 | -2.01182396 | 2.76812403  |

|   |             |             |             |
|---|-------------|-------------|-------------|
| H | -1.15148910 | -2.75186597 | 1.28849402  |
| N | 2.42345403  | 4.19878100  | -0.04290399 |
| H | 2.14686504  | 4.64551601  | 0.82284201  |
| N | 1.93063700  | 2.15909800  | 0.97863602  |
| N | 2.29208300  | 2.24409699  | -1.29307200 |
| C | 2.22211101  | 2.86884300  | -0.10587099 |
| C | 1.89066101  | 2.82576000  | -2.58619500 |
| H | 0.97336402  | 3.41019302  | -2.47507700 |
| H | 2.67876803  | 3.46109399  | -3.00370700 |
| C | 1.67132099  | 1.59001500  | -3.48024800 |
| C | 2.66914797  | 0.58365398  | -2.89835400 |
| H | 3.68660698  | 0.83208296  | -3.22248500 |
| H | 2.42977195  | -0.44521602 | -3.16979000 |
| C | 2.53784297  | 0.80441998  | -1.38629300 |
| H | 1.90884099  | 1.84052900  | -4.51783401 |
| C | 3.41923406  | 4.93267398  | -0.84605999 |
| C | 4.52990207  | 5.45148097  | 0.06355701  |
| C | 2.75035607  | 6.06202298  | -1.62185899 |
| H | 3.85603304  | 4.20125897  | -1.52887099 |
| H | 5.04487506  | 4.62562395  | 0.56063301  |
| H | 5.25996108  | 6.01190995  | -0.52682599 |
| H | 4.12397108  | 6.12780495  | 0.82512302  |
| H | 1.95461506  | 5.68593801  | -2.26962300 |
| H | 2.31320208  | 6.78801199  | -0.92786999 |
| H | 3.48758208  | 6.58390400  | -2.23824700 |
| C | 2.14460600  | 2.50797000  | 2.39167102  |
| C | 1.01681602  | 3.36929602  | 2.96109203  |
| C | 3.53190502  | 3.09633097  | 2.65611902  |
| H | 2.09196199  | 1.53292399  | 2.88760302  |
| H | 0.04629700  | 2.89804703  | 2.78841102  |
| H | 1.16212402  | 3.49639102  | 4.03803403  |
| H | 0.99462703  | 4.37068802  | 2.51445202  |
| H | 4.28327302  | 2.61364696  | 2.02350002  |
| H | 3.56629804  | 4.17525098  | 2.47745002  |
| H | 3.79360002  | 2.93400497  | 3.70555603  |
| O | 0.34777597  | 1.13060002  | -3.48008300 |
| H | 0.11701096  | 0.66086802  | -2.65048900 |
| H | 1.50497298  | 1.23780000  | 0.83348202  |
| C | -1.51371908 | -1.20832096 | -1.08155299 |
| C | -2.40588906 | -0.09481393 | -1.54211499 |
| N | -3.71476807 | -0.41270491 | -1.64199000 |
| O | -1.96939204 | 1.02661606  | -1.78207599 |
| N | -0.25246807 | -1.13880898 | -1.49643599 |
| C | -6.05571710 | 0.24877813  | -1.30169500 |
| C | -6.16777910 | -0.32597187 | -0.03131299 |

|   |             |             |             |
|---|-------------|-------------|-------------|
| C | -7.42375708 | -0.62957785 | 0.48928201  |
| C | -8.57639511 | -0.36683183 | -0.24833599 |
| C | -8.46867707 | 0.19875518  | -1.51674799 |
| C | -7.21360705 | 0.50082915  | -2.03952800 |
| C | -4.70648006 | 0.62774811  | -1.86109499 |
| H | -4.02892509 | -1.31855791 | -1.31292999 |
| H | -5.26830908 | -0.52923789 | 0.55057802  |
| H | -7.50086413 | -1.07386485 | 1.47681502  |
| H | -9.55322211 | -0.60466881 | 0.16195701  |
| H | -9.36048910 | 0.40094219  | -2.10236500 |
| H | -7.12973008 | 0.93629415  | -3.03214900 |
| H | -4.79401505 | 0.84836511  | -2.93154700 |
| H | -4.33219604 | 1.53960711  | -1.37726699 |
| H | -1.98995409 | -2.17294295 | -0.91774599 |
| H | 1.68620096  | 0.22519499  | -1.00701199 |
| O | 4.61997799  | 1.23591395  | -0.21729899 |
| C | 3.80391097  | 0.41486496  | -0.61799799 |
| N | 3.90570695  | -0.92261305 | -0.46047799 |
| C | 4.95961895  | -1.56472907 | 0.25742201  |
| C | 4.98142195  | -1.46936108 | 1.65967102  |
| C | 5.98983395  | -2.14638709 | 2.34574302  |
| H | 6.03354494  | -2.09489009 | 3.42886803  |
| C | 6.94162695  | -2.89771811 | 1.65918302  |
| H | 7.71747991  | -3.42060613 | 2.21049302  |
| C | 6.90447093  | -2.97242211 | 0.27283301  |
| H | 7.65375591  | -3.54845213 | -0.26441799 |
| C | 5.91579994  | -2.30093309 | -0.45173199 |
| H | 3.15288894  | -1.49296104 | -0.85771499 |
| C | 3.92696696  | -0.64375905 | 2.36424602  |
| C | 3.95309095  | -0.71301005 | 3.88744403  |
| H | 2.93779295  | -0.94180904 | 1.99213002  |
| H | 4.05586297  | 0.39781895  | 2.04295802  |
| H | 3.13851896  | -0.11533603 | 4.30783603  |
| H | 3.82912694  | -1.74044306 | 4.24465203  |
| H | 4.89249697  | -0.32422307 | 4.29316003  |
| C | 5.87601592  | -2.39179809 | -1.95791400 |
| C | 4.87512091  | -3.44133608 | -2.45532400 |
| H | 6.87871292  | -2.64216611 | -2.32016100 |
| H | 5.61445696  | -1.41416308 | -2.37837700 |
| H | 4.92384091  | -3.53846208 | -3.54428400 |
| H | 5.09174090  | -4.42021609 | -2.01425100 |
| H | 3.85030891  | -3.16579606 | -2.18822299 |
| O | 0.01897289  | -3.27439599 | -0.67366299 |
| C | 0.83638188  | -4.43189901 | -0.32839499 |
| C | -0.12319414 | -5.31277499 | 0.46699301  |

|   |             |             |             |
|---|-------------|-------------|-------------|
| C | 2.01282188  | -4.01241403 | 0.55512501  |
| C | 1.28171186  | -5.16636502 | -1.58956300 |
| C | 0.56211792  | -2.21436700 | -1.31664999 |
| O | 1.72225292  | -2.24104702 | -1.73266000 |
| H | -1.00306516 | -5.56186897 | -0.13345099 |
| H | 0.37884184  | -6.24384901 | 0.74500502  |
| H | -0.45212914 | -4.81324599 | 1.38354002  |
| H | 2.84099390  | -3.60578305 | -0.02786399 |
| H | 2.37979887  | -4.88332404 | 1.10698802  |
| H | 1.68184290  | -3.25776602 | 1.27743602  |
| H | 1.81044585  | -6.08186702 | -1.30496899 |
| H | 0.40873985  | -5.44612903 | -2.18781999 |
| H | 1.94609088  | -4.54868803 | -2.19361900 |

Zero-point correction= 1.143133 (Hartree/Particle)

Thermal correction to Energy= 1.208034

Thermal correction to Enthalpy= 1.208978

Thermal correction to Gibbs Free Energy= 1.040472

## 10. Characterization of some substrates

### 2-(Benzylamino)-1-[(*tert*-butoxycarbonyl)amino]-2-oxoethyl acetate

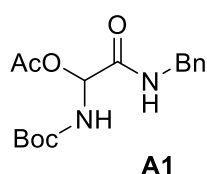

**<sup>1</sup>H NMR** (400 MHz, Chloroform-*d*)  $\delta$  = 7.41 – 7.15 (m, 5H), 6.81 (s, 1H), 6.39 (d, 1H), 6.23 (s, 1H), 4.51 (dd, *J* = 15.2, 6.0 Hz, 1H), 4.41 (dd, *J* = 15.2, 6.0 Hz, 1H), 2.11 (s, 3H), 1.46 (s, 9H).  
**<sup>13</sup>C NMR** (101 MHz, CDCl<sub>3</sub>)  $\delta$  = 171.9, 165.3, 154.0, 137.3, 128.9, 127.9, 127.8, 81.4, 75.5, 43.9, 28.3, 21.1.  
**IR:** 3336, 3209, 3031, 1743, 1701, 1657, 1547 cm<sup>-1</sup>.

### 2-(Benzylamino)-1-[(benzyloxy)carbonyl]amino)-2-oxoethyl acetate

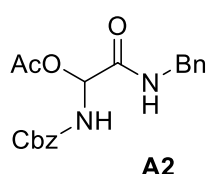

**<sup>1</sup>H NMR** (400 MHz, Chloroform-*d*)  $\delta$  = 7.44 – 7.16 (m, 9H), 6.88 (s, 1H), 6.55 (s, 1H), 6.43 (d, *J* = 8.8 Hz, 1H), 5.12 (dd, *J* = 22.4, 12.4 Hz, 2H), 4.44 (m, 2H), 2.08 (s, 3H).  
**<sup>13</sup>C NMR** (101 MHz, CDCl<sub>3</sub>)  $\delta$  = 171.8, 165.0, 154.9, 137.2, 135.7, 128.9, 128.7, 128.5, 128.3, 127.9, 127.7, 75.5, 67.7, 43.8, 21.0.  
**IR:** 3355, 3196, 3038, 1757, 1711, 1650, 1553 cm<sup>-1</sup>.

### 1-(*Tert*-butoxycarbonyl)amino)-2-(methylamino)-2-oxoethyl acetate

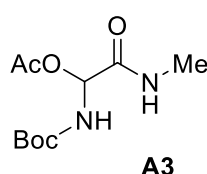

**<sup>1</sup>H NMR** (400 MHz, Chloroform-*d*)  $\delta$  = 6.50 (s, 1H), 6.35 (d, *J* = 8.8 Hz, 1H), 6.23 (s, 1H), 2.86 (d, *J* = 4.8 Hz, 3H), 2.13 (s, 3H), 1.46 (s, 9H).  
**<sup>13</sup>C NMR** (101 MHz, CDCl<sub>3</sub>)  $\delta$  = 171.9, 165.9, 154.0, 81.3, 75.4, 28.3, 26.6, 21.2.  
**IR:** 3354, 3214, 3033, 1745, 1706, 1663, 1552 cm<sup>-1</sup>.

## 11. Analysis results of 2D NMR spectra of the product C1 and D3

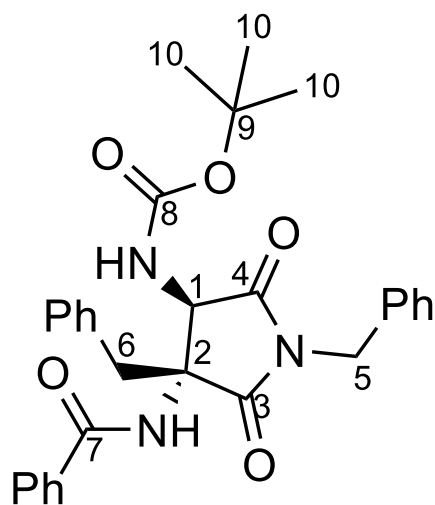

| Number of Atom | H (ppm)      | C (ppm) |
|----------------|--------------|---------|
| 1              | 5.2          | 57.9    |
| 2              | --           | 64.7    |
| 3              | --           | 173.2   |
| 4              | --           | 172.6   |
| 5              | 4.4-4.7 (2H) | 42.9    |
| 6              | 2.9-3.2 (2H) | 38.5    |
| 7              | --           | 167.7   |
| 8              | --           | 155.7   |
| 9              | --           | 80.7    |
| 10             | 1.4 (9H)     | 28.4    |



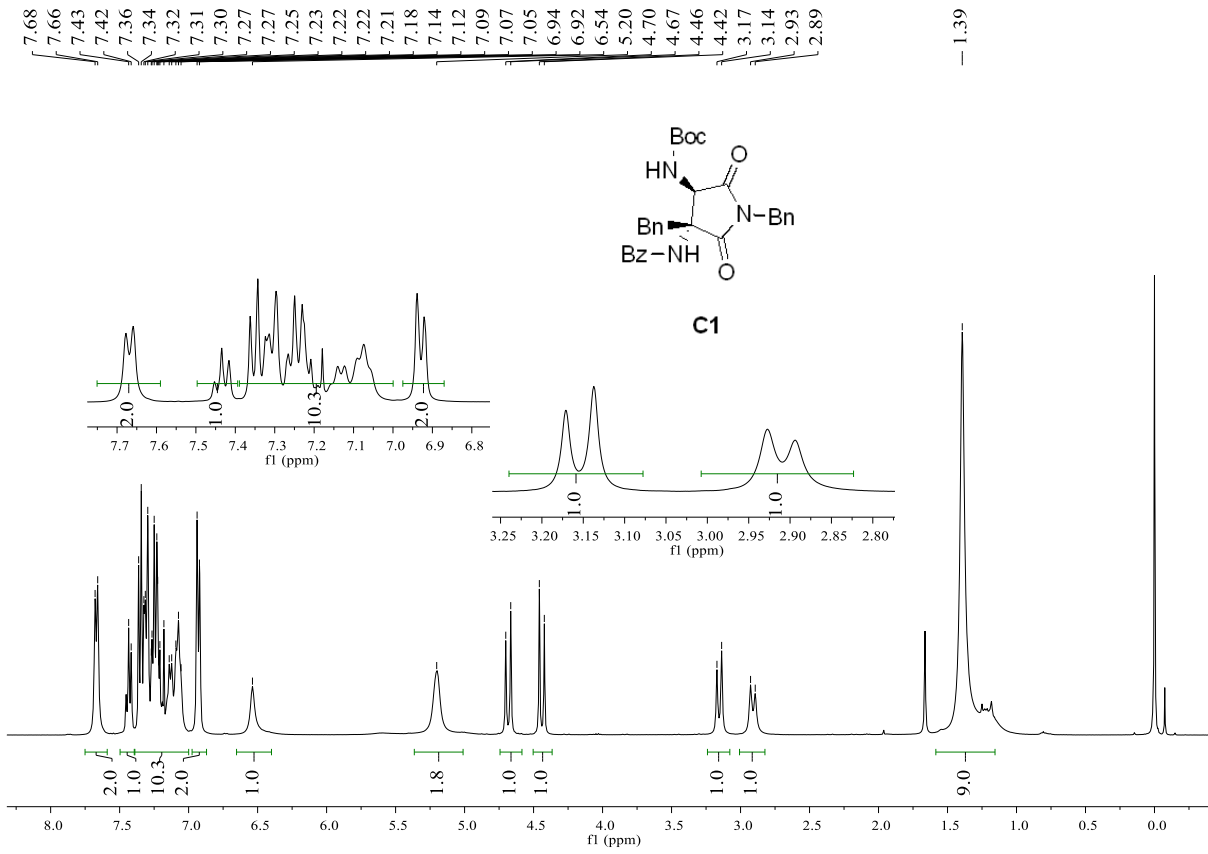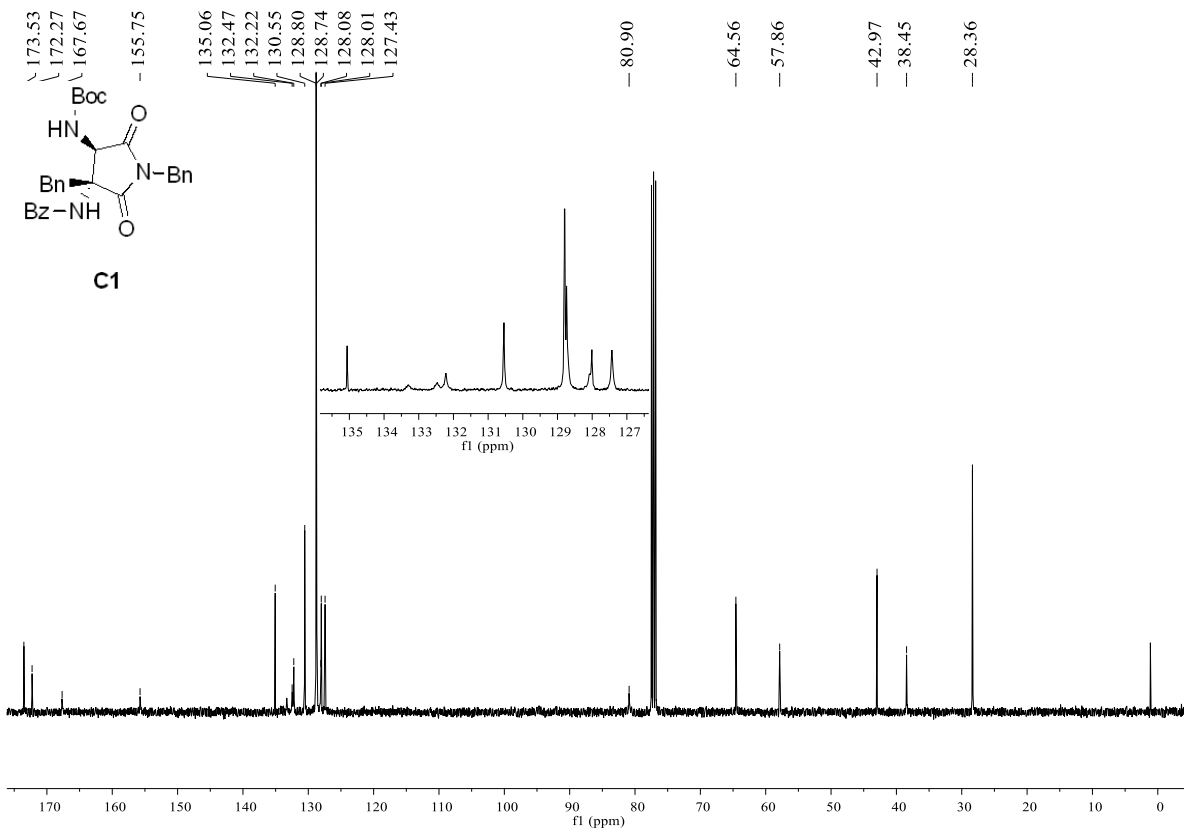

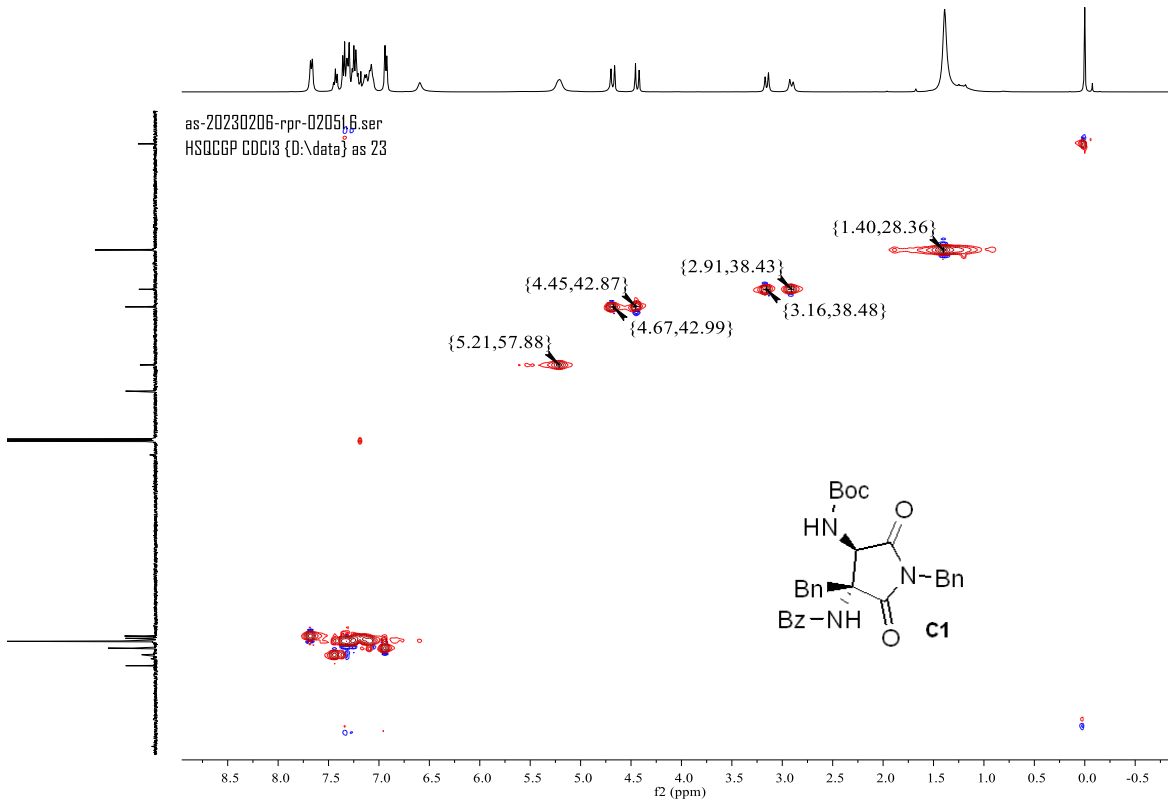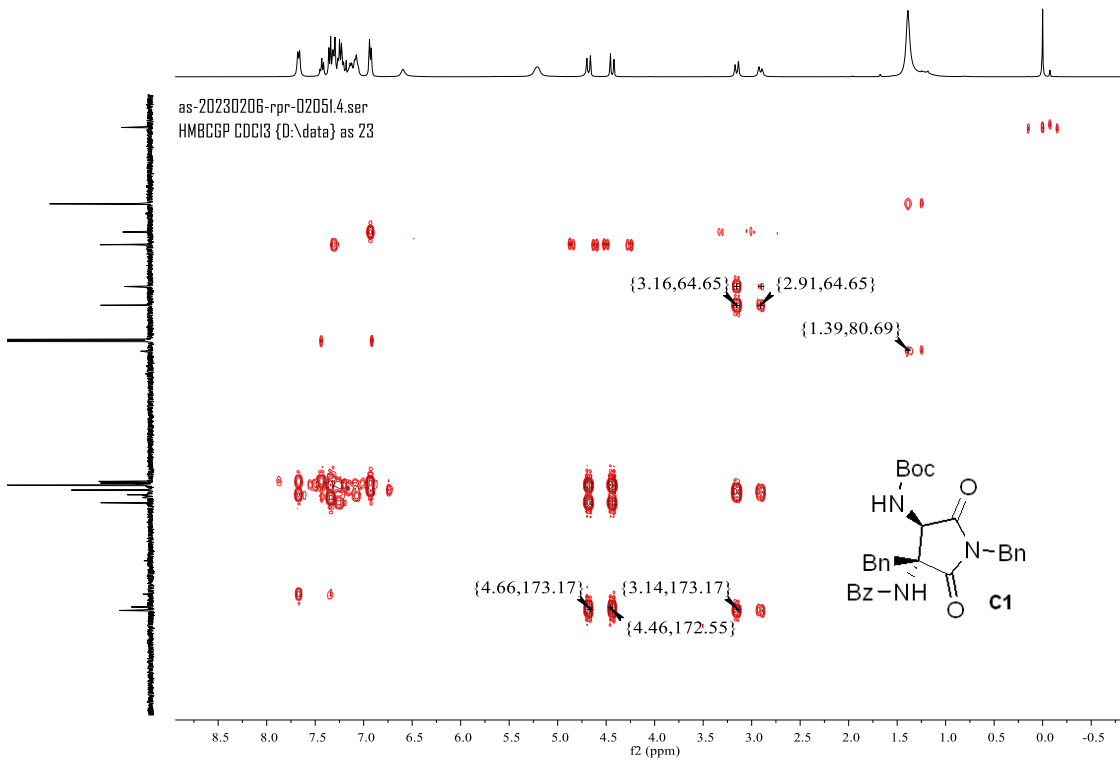

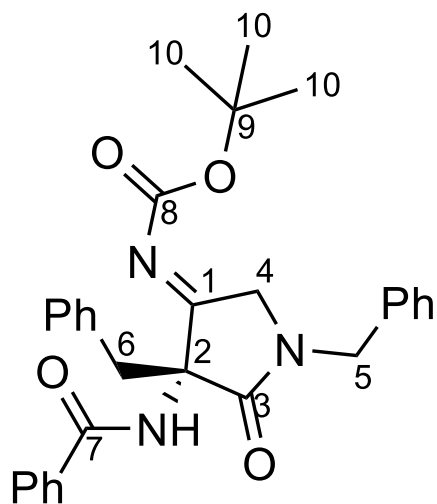

| Number of Atom | H (ppm)                                                 | C (ppm) |
|----------------|---------------------------------------------------------|---------|
| 1              | --                                                      | 173.6   |
| 2              | --                                                      | 62.4    |
| 3              | --                                                      | 175.7   |
| 4              | 5.1 (d, $J = 7.6$ Hz, 1H)<br>4.8 (d, $J = 7.6$ Hz, 1H). | 53.8    |
| 5              | 4.6-4.7 (2H)                                            | 42.6    |
| 6              | 3.4-3.6 (2H)                                            | 41.4    |
| 7              | --                                                      | 168.8   |
| 8              | --                                                      | 156.5   |
| 9              | --                                                      | 80.4    |
| 10             | 1.3 (9H)                                                | 28.1    |

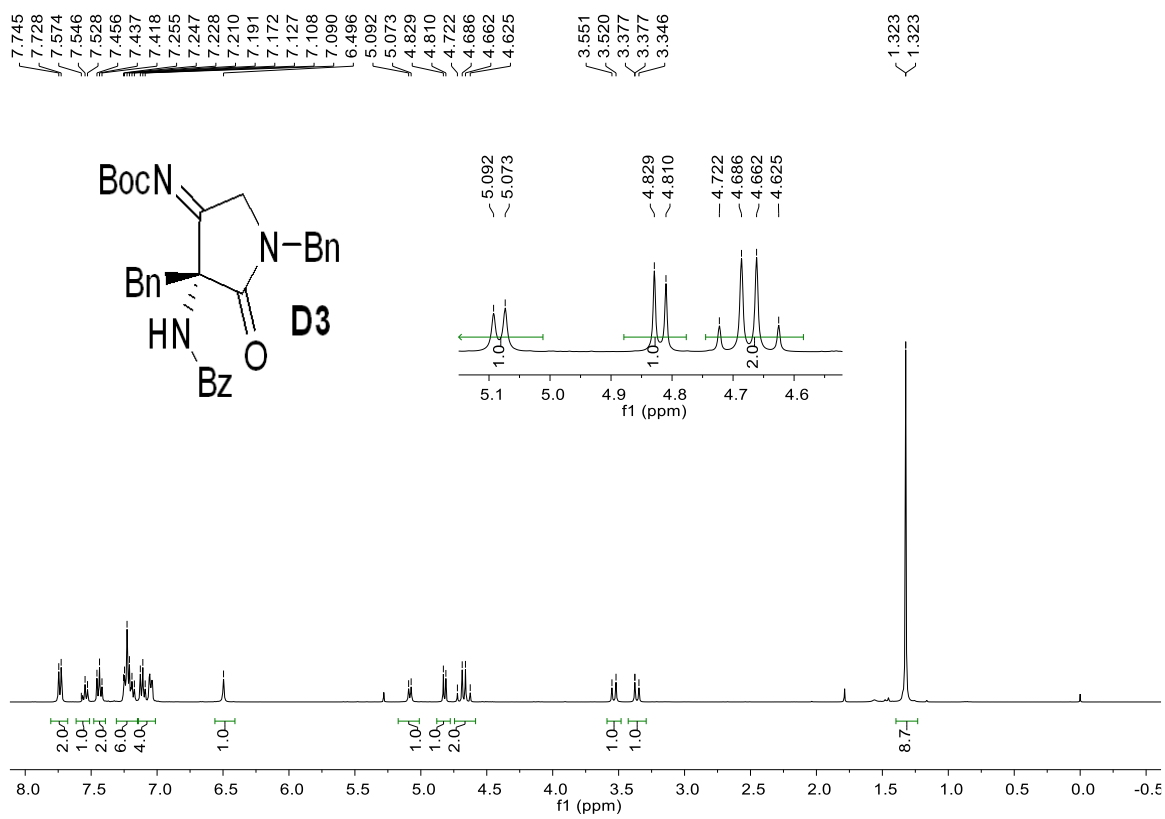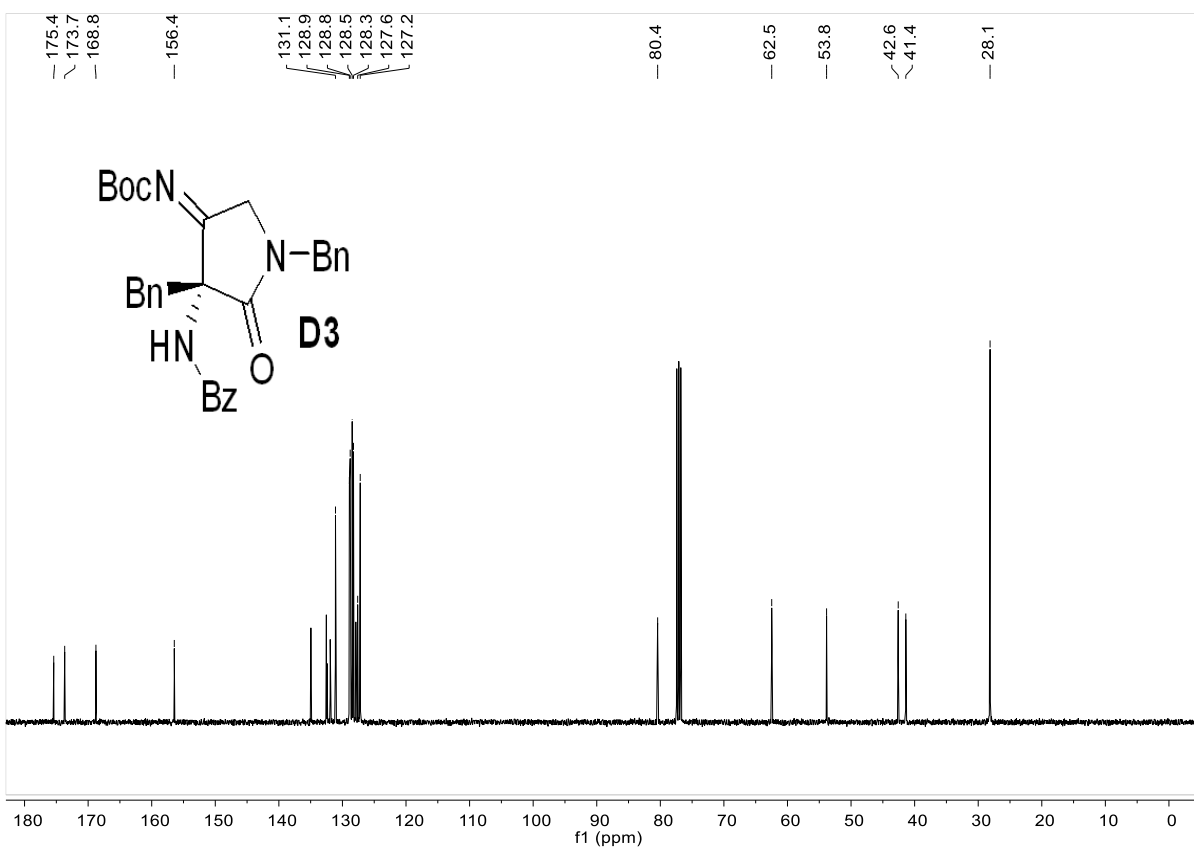

as-20230222-RPR-0222.5.1.2rr  
HSQC GP CDCl3 {D:\data} as 42

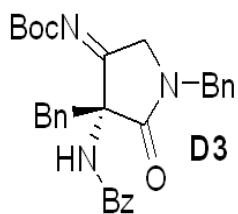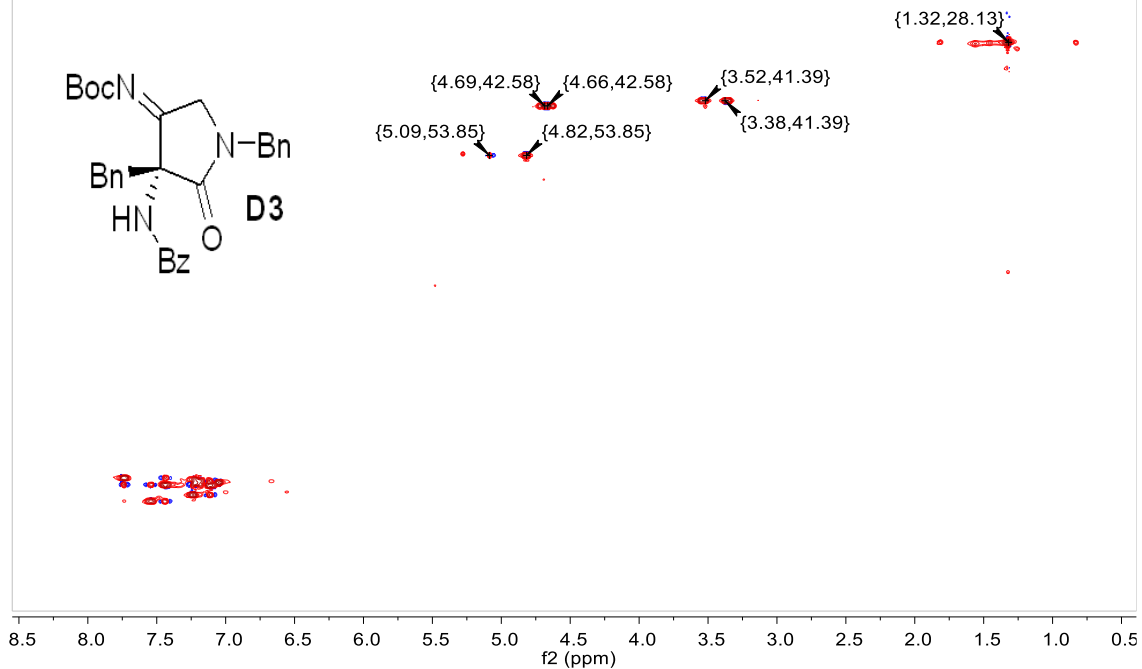

as-20230222-RPR-0222.4.1.2rr  
HMBC GP CDCl3 {D:\data} as 42

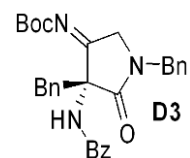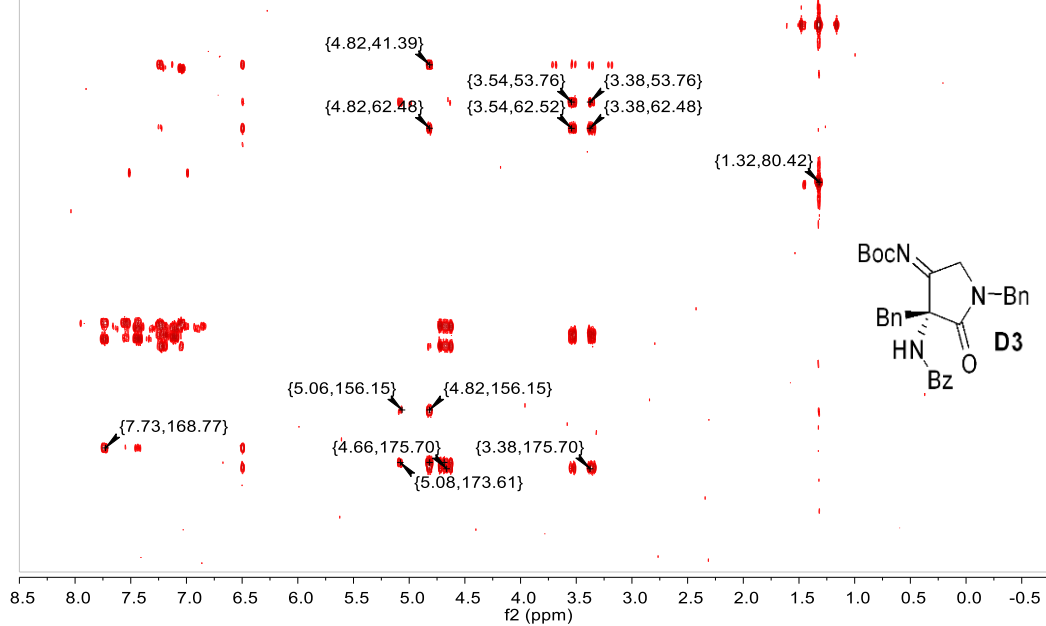

### 13. Characterization of the products

#### Tert-butyl ((3R,4R)-4-benzamido-1,4-dibenzyl-2,5-dioxopyrrolidin-3-yl)carbamate **C1**

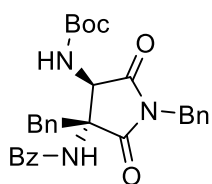

**C1**

White solid; 45.1 mg, 88% yield, 91:9 er, melting point: 82–85 °C;  $[\alpha]_D^{17} = +40.6$  ( $c = 0.89$  in  $\text{CH}_2\text{Cl}_2$ ).

Dr value determined by  $^1\text{H NMR}$  analysis after flash filtration to reaction mixture with a thin silica gel: 94:6.

**SFC** Daicel chiralcel OX-3,  $\text{CO}_2/\text{MeOH} = 80/20$ , flow rate = 1.5 mL/min,  $\lambda = 254$  nm,  $t_R$  (major) = 3.21 min,  $t_R$  (minor) = 4.03 min.

**$^1\text{H NMR}$**  (400 MHz, Chloroform-*d*)  $\delta = 7.74$  (d,  $J = 7.6$  Hz, 2H), 7.50 (d,  $J = 7.3$  Hz, 1H), 7.46 – 7.07 (m, 10H), 7.01 (d, 2H), 6.54 (s, 1H), 5.20 (s, 2H), 4.76 (d,  $J = 14.4$  Hz, 1H), 4.52 (d,  $J = 14.4$  Hz, 1H), 3.15

(d,  $J = 13.6$  Hz, 1H), 3.00 (d,  $J = 13.6$  Hz, 1H), 1.47 (s, 9H).

**$^{13}\text{C NMR}$**  (101 MHz,  $\text{CDCl}_3$ )  $\delta = 173.5, 172.3, 167.7, 155.8, 135.1, 132.5, 132.2, 130.6, 128.8, 128.7, 128.1, 128.0, 127.4, 80.90, 64.6, 57.9, 43.0, 38.5, 28.4$ ;

**IR**: 3352, 1716, 1655, 1508  $\text{cm}^{-1}$ .

**HRMS** (FTMS+c ESI)  $m/z$ :  $[\text{M} + \text{H}]^+$  calcd for  $\text{C}_{30}\text{H}_{32}\text{N}_3\text{O}_5^+$  514.2336; Found 514.2342.

After recrystallization: >99:1 er,  $[\alpha]_D^{22} = +60.9$  ( $c = 1.83$  in  $\text{CH}_2\text{Cl}_2$ ).

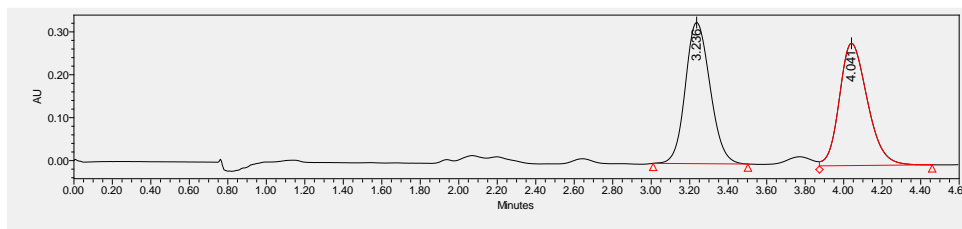

|   | Retention Time | % Area |
|---|----------------|--------|
| 1 | 3.236          | 50.49  |
| 2 | 4.041          | 49.51  |

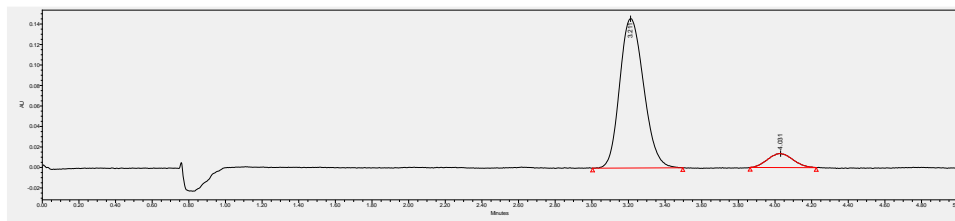

|   | Retention Time | % Area |
|---|----------------|--------|
| 1 | 3.211          | 90.95  |
| 2 | 4.031          | 9.05   |

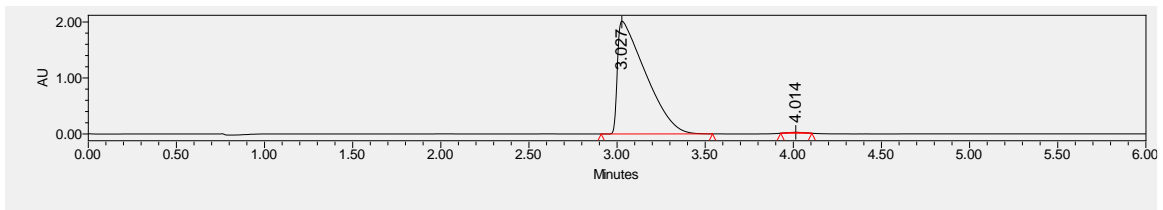

|   | Retention Time | % Area |
|---|----------------|--------|
| 1 | 3.027          | 99.54  |
| 2 | 4.014          | 0.46   |

## Benzyl ((3R,4R)-4-benzamido-1,4-dibenzyl-2,5-dioxopyrrolidin-3-yl)carbamate **C2**

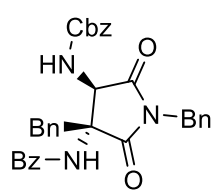

**C2**

White solid; 45.4 mg, 83% yield, 81:19 er, melting point: 68–71 °C;  $[\alpha]^{16}_D = +26.5$  ( $c = 0.91$  in  $\text{CH}_2\text{Cl}_2$ ).

Dr value determined by  $^1\text{H NMR}$  analysis: after flash filtration to reaction mixture with a thin silica gel:

87:13; after purification by flash column chromatography: 9:1.

**SFC** Daicel chiralcel OX-3,  $\text{CO}_2/\text{MeOH} = 80/20$ , flow rate = 1.5 mL/min,  $\lambda = 254$  nm,  $t_R$  (major) = 10.59 min,  $t_R$  (minor) = 14.87 min.

**$^1\text{H NMR}$**  (400 MHz, Chloroform- $d$ )  $\delta = 7.75$  (d,  $J = 7.5$  Hz, 2H), 7.58 – 7.03 (m, 17H), 6.94 (d,  $J = 7.5$  Hz, 2H), 6.65 (s, 1H), 5.48 (d, 2H), 5.14 (s, 2H), 4.75 (d,  $J = 14.4$  Hz, 1H), 4.49 (d,  $J = 14.4$  Hz, 1H), 3.21 (d,

$J = 13.6$  Hz, 1H), 2.98 (d,  $J = 13.6$  Hz, 1H).

**$^{13}\text{C NMR}$**  (101 MHz,  $\text{CDCl}_3$ )  $\delta = 172.2, 170.7, 166.6, 155.4, 133.8, 131.1, 129.3, 127.7, 127.6, 127.6, 127.4, 127.1, 127.0, 126.9, 126.3, 66.6, 63.5, 56.7, 41.9, 37.3$ .

**IR:** 3325, 3032, 1791, 1709, 1655, 1510  $\text{cm}^{-1}$ .

**HRMS** (FTMS+c ESI)  $m/z$ :  $[\text{M} + \text{H}]^+$  calcd for  $\text{C}_{33}\text{H}_{30}\text{N}_3\text{O}_5^+$  548.2180; Found 548.2178.

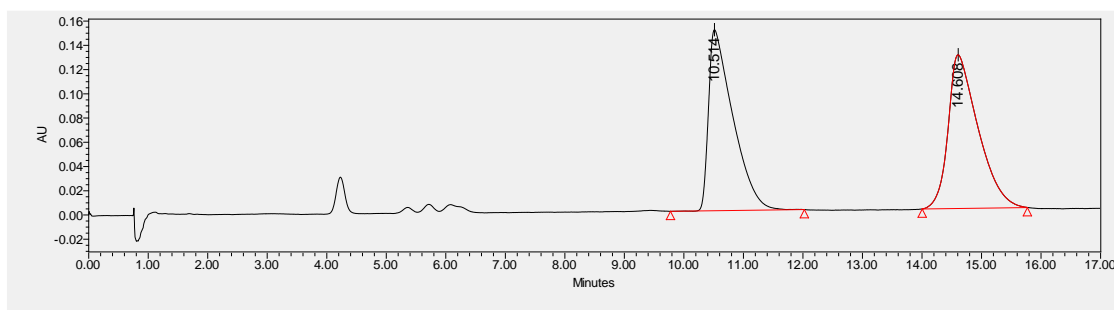

|   | Retention Time | % Area |
|---|----------------|--------|
| 1 | 10.514         | 48.83  |
| 2 | 14.608         | 51.17  |

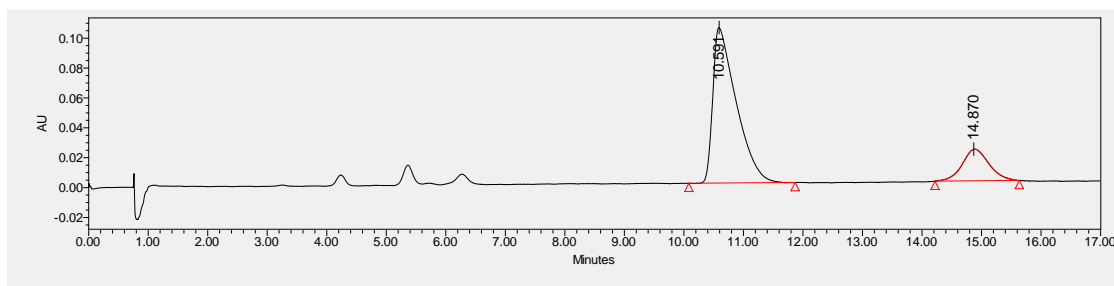

|   | Retention Time | % Area |
|---|----------------|--------|
| 1 | 10.591         | 81.16  |
| 2 | 14.870         | 18.84  |



**Tert-butyl ((3R,4R)-4-benzamido-4-benzyl-1-methyl-2,5-dioxopyrrolidin-3-yl)carbamate C3**

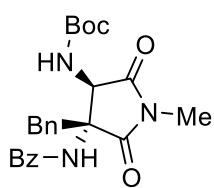

**C3**

White solid; 18.4 mg, 42% yield, 92:8 er; melting point: 79–84 °C;  $[\alpha]_D^{17} = +35.1$  ( $c = 0.28$  in  $\text{CH}_2\text{Cl}_2$ ).

Dr value determined by  $^1\text{H NMR}$  analysis after flash filtration to reaction mixture with a thin silica gel: 94:6.

**SFC** Daicel chiralcel OX-3,  $\text{CO}_2/\text{MeOH} = 80/20$ , flow rate = 1.5 mL/min,  $\lambda = 254$  nm,  $t_R$  (major) = 2.02 min,  $t_R$  (minor) = 2.71 min.

**$^1\text{H NMR}$**  (400 MHz,  $\text{CHCl}_3$ )  $\delta = 7.87 - 7.71$  (m, 2H), 7.58 – 7.49 (m, 1H), 7.44 (dd, 2H), 7.36 – 7.23 (m, 4H), 7.22 – 7.14 (m, 2H), 6.65 (s, 1H), 5.21 (d, 2H), 3.26 (d,  $J = 13.6$  Hz, 1H), 3.15 (d,  $J = 13.6$

Hz, 1H), 2.90 (s, 3H), 1.49 (s, 9H).

**$^{13}\text{C NMR}$**  (101 MHz,  $\text{CDCl}_3$ )  $\delta = 174.1, 172.5, 167.6, 155.8, 133.2, 132.7, 132.3, 130.6, 128.8, 128.3, 127.5, 81.0, 65.2, 57.6, 38.6, 28.4, 25.1$ .

**IR:** 3338, 1707, 1653, 1578, 1521  $\text{cm}^{-1}$ .

**HRMS** (FTMS+c ESI)  $m/z$ :  $[\text{M} + \text{Na}]^+$  calcd for  $\text{C}_{24}\text{H}_{27}\text{N}_3\text{O}_5\text{Na}^+$  460.1843; Found 460.1837.

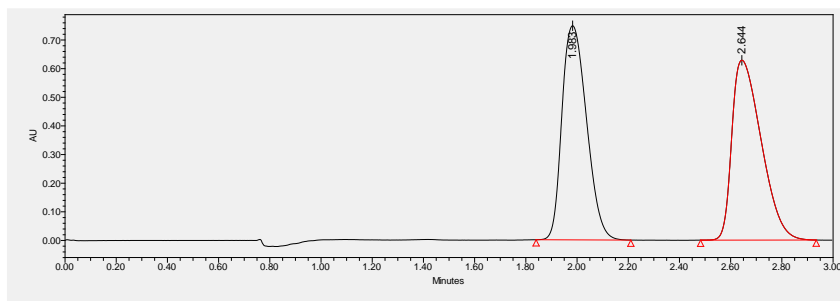

|   | Retention Time | % Area |
|---|----------------|--------|
| 1 | 1.983          | 49.98  |
| 2 | 2.644          | 50.02  |

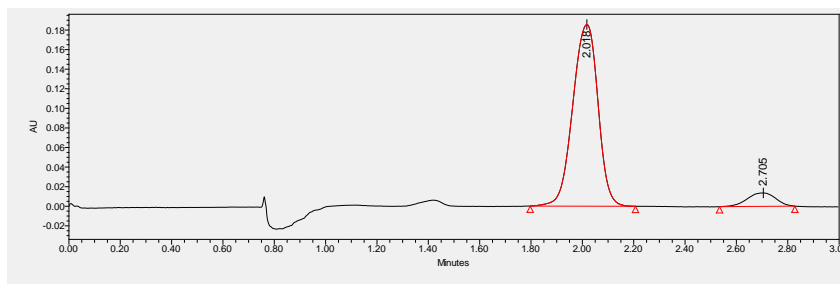

|   | Retention Time | % Area |
|---|----------------|--------|
| 1 | 2.018          | 92.31  |
| 2 | 2.705          | 7.69   |

**Tert-butyl ((3R,4R)-1,4-dibenzyl-4-(4-fluorobenzamido)-2,5-dioxopyrrolidin-3-yl)carbamate C4**

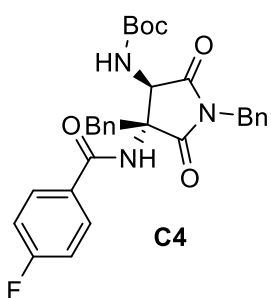

White solid; 37.2 mg, 70% yield, 90:10 er; melting point: 89–91 °C;  $[\alpha]_D^{17} = +39.8$  ( $c = 0.65$  in  $\text{CH}_2\text{Cl}_2$ ).

Dr value determined by  $^1\text{H NMR}$  analysis after flash filtration to reaction mixture with a thin silica gel: 71:29.

**SFC** Daicel chiralcel OX-3,  $\text{CO}_2/\text{MeOH} = 80/20$ , flow rate = 1.5 mL/min,  $\lambda = 254$  nm,  $t_R$  (major) = 2.34 min,  $t_R$  (minor) = 2.92 min.

**$^1\text{H NMR}$**  (400 MHz, Chloroform- $d$ )  $\delta = 7.76$  (dd, 2H), 7.47 – 7.05 (m, 10H), 7.04 – 6.93 (m, 2H), 6.56 (s, 1H), 5.27 (s, 2H), 4.75 (d,  $J = 14.4$  Hz, 1H), 4.50 (d,  $J = 14.4$  Hz, 1H), 3.22 (d,  $J = 13.6$  Hz,

1H), 2.98 (d,  $J = 13.6$  Hz, 1H), 1.47 (s, 9H).

**$^{13}\text{C NMR}$**  (101 MHz, Chloroform- $d$ )  $\delta = 173.5, 172.2, 166.5, 164.0, 135.0, 132.4, 130.5, 129.9$  (d,  $J = 36$  Hz), 128.8 (d,  $J = 16$  Hz), 128.1, 115.9 (d,  $J = 88$  Hz), 81.0, 64.7, 57.8, 43.0, 38.5, 28.4.

**$^{19}\text{F NMR}$**  (377 MHz,  $\text{CDCl}_3$ )  $\delta = -107.07$ .

**IR:** 3308, 1704, 1655, 1495  $\text{cm}^{-1}$ .

**HRMS** (FTMS+c ESI)  $m/z$ :  $[\text{M} + \text{H}]^+$  calcd for  $\text{C}_{30}\text{H}_{31}\text{FN}_3\text{O}_5^+$  532.2242; Found 532.2233.

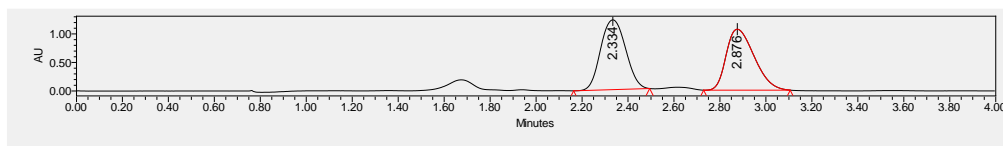

|   | Retention Time | % Area |
|---|----------------|--------|
| 1 | 2.334          | 50.62  |
| 2 | 2.876          | 49.38  |

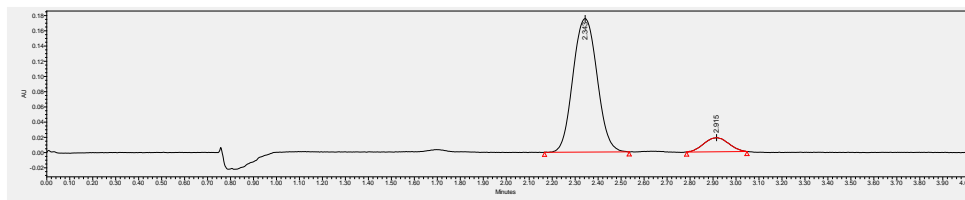

|   | Retention Time | % Area |
|---|----------------|--------|
| 1 | 2.343          | 90.21  |
| 2 | 2.915          | 9.79   |

**Tert-butyl ((3R,4R)-1,4-dibenzyl-4-(4-chlorobenzamido)-2,5-dioxopyrrolidin-3-yl)carbamate C5**

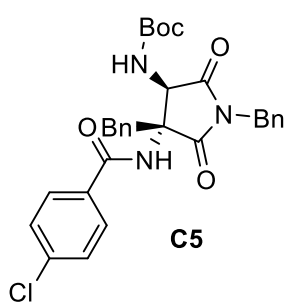

White solid; 41.0 mg, 75% yield, 85:15 er; melting point: 95–97 °C;  $[\alpha]^{16}_D = +40.4$  ( $c = 0.85$  in  $\text{CH}_2\text{Cl}_2$ ).

Dr value determined by  $^1\text{H NMR}$  analysis after flash filtration to reaction mixture with a thin silica gel: 77:23.

**SFC** Daicel chiralcel OX-3,  $\text{CO}_2/\text{MeOH} = 80/20$ , flow rate = 1.5 mL/min,  $\lambda = 254$  nm,  $t_R$  (major) = 2.28 min,  $t_R$  (minor) = 4.33 min.

**$^1\text{H NMR}$**  (400 MHz, Chloroform- $d$ )  $\delta = 7.68$  (d,  $J = 8.0$  Hz, 2H), 7.51 – 7.08 (m, 10H), 7.06 – 6.89 (m, 2H), 6.60 (s, 1H), 5.35 – 5.14 (m, 2H), 4.74 (d,  $J = 14.4$  Hz 1H), 4.49 (d,  $J = 14.4$  Hz ,1H), 3.22

(d,  $J = 13.6$  Hz, 1H), 2.98 (d,  $J = 13.6$  Hz, 1H), 1.47 (s, 9H).

**$^{13}\text{C NMR}$**  (101 MHz,  $\text{CDCl}_3$ )  $\delta = 173.3, 172.1, 166.6, 155.7, 138.4, 134.9, 132.2, 131.6, 130.4, 129.5, 128.9, 128.8, 128.7, 128.7, 128.1, 128.0, 80.9, 64.6, 57.7, 42.9, 38.4, 28.3$ .

**IR:** 3325, 1791, 1656, 1596, 1483  $\text{cm}^{-1}$ .

**HRMS** (FTMS+c ESI)  $m/z$ :  $[\text{M} + \text{K}]^+$  calcd for  $\text{C}_{30}\text{H}_{30}\text{ClN}_3\text{O}_5\text{K}^+$  586.1505, 587.1539; Found 586.1501, 587.1542.

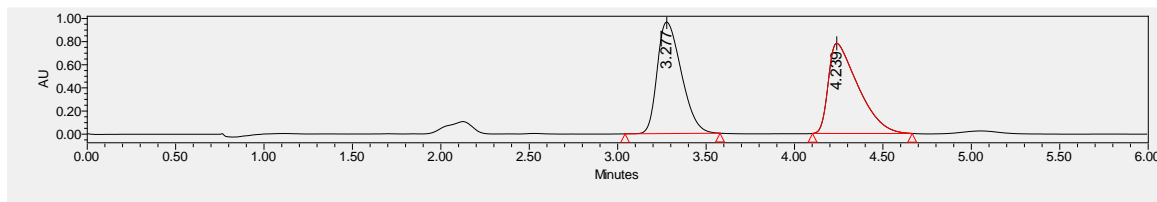

|   | Retention Time | % Area |
|---|----------------|--------|
| 1 | 3.277          | 50.15  |
| 2 | 4.239          | 49.85  |

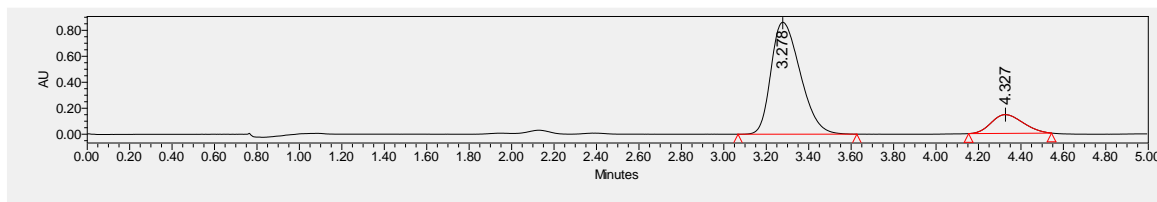

|   | Retention Time | % Area |
|---|----------------|--------|
| 1 | 3.278          | 84.58  |
| 2 | 4.327          | 15.42  |

**Tert-butyl ((3R,4R)-1,4-dibenzyl-4-(4-bromobenzamido)-2,5-dioxopyrrolidin-3-yl)carbamate C6**

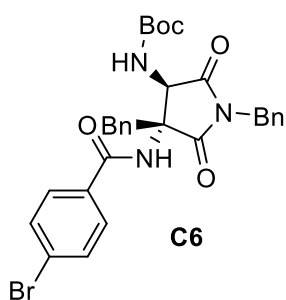

White solid; 44.9 mg, 76% yield, 80:20 er; melting point: 94–98 °C;  $[\alpha]_D^{17} = +33.9$  ( $c = 0.82$  in  $\text{CH}_2\text{Cl}_2$ ).

Dr value determined by  $^1\text{H NMR}$  analysis after flash filtration to reaction mixture with a thin silica gel: 83:17.

**SFC** Daicel chiralcel OX-3,  $\text{CO}_2/\text{MeOH} = 80/20$ , flow rate = 1.5 mL/min,  $\lambda = 254$  nm,  $t_R$  (major) = 4.04 min,  $t_R$  (minor) = 5.52 min.

**$^1\text{H NMR}$**  (400 MHz,  $\text{Chloroform-d}$ )  $\delta = 7.69 - 7.49$  (m, 4H), 7.44 – 7.07 (m, 8H), 7.08 – 6.85 (m, 2H), 6.59 (s, 1H), 5.26 (d, 2H), 4.74 (d,  $J = 13.6$  Hz, 1H), 4.49 (d,  $J = 13.6$  Hz, 1H), 3.21 (d,  $J = 14.4$  Hz, 1H), 2.98 (d,  $J = 14.4$  Hz, 1H), 1.47 (s, 9H).

**$^{13}\text{C NMR}$**  (101 MHz,  $\text{CDCl}_3$ )  $\delta = 173.4, 172.2, 166.8, 155.8, 135.0, 132.3, 132.0, 131.78, 130.5, 129.6, 129.1, 128.8, 128.8, 128.2, 128.1, 127.0, 81.0, 64.7, 57.7, 43.0, 38.5, 28.4$ .

**IR:** 3326, 1791, 1713, 1654, 1498  $\text{cm}^{-1}$ .

**HRMS** (FTMS+c ESI)  $m/z$ :  $[\text{M} + \text{K}]^+$  calcd for  $\text{C}_{30}\text{H}_{30}\text{BrN}_3\text{O}_5\text{K}^+$  630.1000, 631.1034; Found 630.0997, 631.1042.

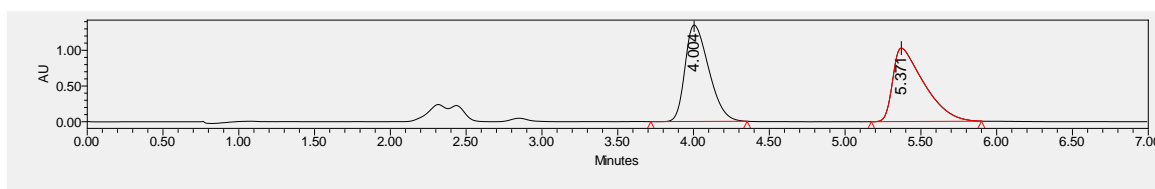

|   | Retention Time | % Area |
|---|----------------|--------|
| 1 | 4.004          | 50.04  |
| 2 | 5.371          | 49.96  |

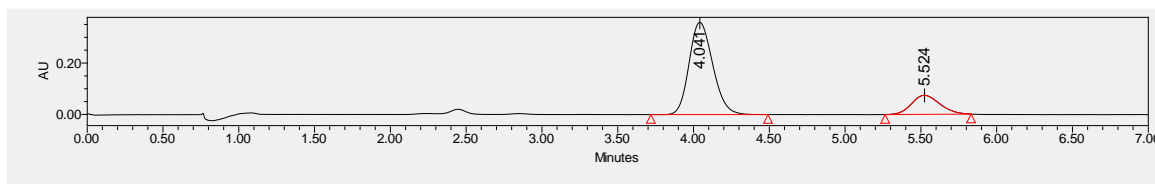

|   | Retention Time | % Area |
|---|----------------|--------|
| 1 | 4.041          | 80.19  |
| 2 | 5.524          | 19.81  |

**Tert-butyl ((3R,4R)-1,4-dibenzyl-4-(4-methylbenzamido)-2,5-dioxopyrrolidin-3-yl)carbamate C7**

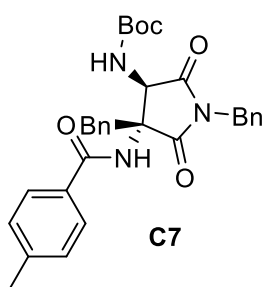

White solid; 43.2 mg, 82% yield, 91:9 er; melting point: 62–66 °C;  $[\alpha]_D^{17} = +40.6$  ( $c = 0.27$  in  $\text{CH}_2\text{Cl}_2$ ).

Dr value determined by  $^1\text{H}$  NMR analysis after flash filtration to reaction mixture with a thin silica gel: 82:18.

**SFC** Daicel chiralcel OX-3,  $\text{CO}_2/\text{MeOH} = 80/20$ , flow rate = 1.5 mL/min,  $\lambda = 254$  nm,  $t_R$  (major) = 3.96 min,  $t_R$  (minor) = 5.21 min.

**$^1\text{H}$  NMR** (400 MHz, Chloroform- $d$ )  $\delta = 7.64$  (d,  $J = 8.0$  Hz, 2H), 7.48 – 7.07 (m, 10H), 7.00 (d, 2H), 6.54 (s, 1H), 5.25 (s, 2H), 4.76 (d,  $J = 13.6$  Hz, 1H), 4.52 (d,  $J = 13.6$  Hz, 1H), 3.23 (d,  $J = 14.4$  Hz,

1H), 2.98 (d,  $J = 14.4$  Hz, 1H), 2.39 (s, 3H), 1.47 (s, 9H).

**$^{13}\text{C}$  NMR** (101 MHz,  $\text{CDCl}_3$ )  $\delta = 173.6, 172.3, 167.6, 135.1, 130.6, 129.4, 128.8, 128.8, 128.7, 128.0, 127.5, 82.8, 64.5, 58.0, 43.0, 38.5, 28.4, 21.7$ .

**IR:** 3338, 1712, 1656  $\text{cm}^{-1}$ .

**HRMS** (FTMS+c ESI)  $m/z$ :  $[\text{M} + \text{H}]^+$  calcd for  $\text{C}_{31}\text{H}_{34}\text{N}_3\text{O}_5^+$  528.2493; Found 528.2491.

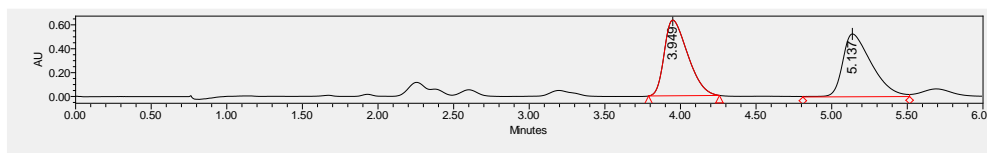

|   | Retention Time | % Area |
|---|----------------|--------|
| 1 | 3.949          | 49.43  |
| 2 | 5.137          | 50.57  |

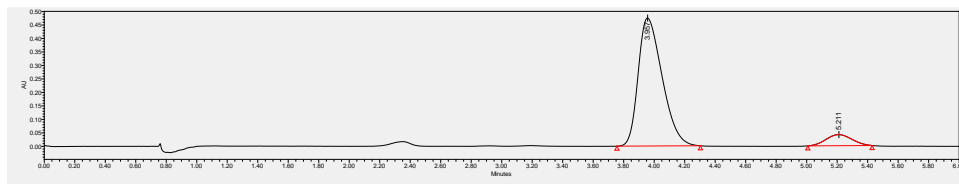

|   | Retention Time | % Area |
|---|----------------|--------|
| 1 | 3.957          | 91.46  |
| 2 | 5.211          | 8.54   |

**Tert-butyl ((3R,4R)-1,4-dibenzyl-4-(4-methoxybenzamido)-2,5-dioxopyrrolidin-3-yl)carbamate C8**

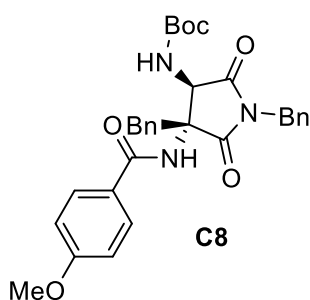

White solid; 42.4 mg, 78% yield, 91:9 er; melting point: 81–84 °C;  $[\alpha]_D^{17} = +29.0$  ( $c = 0.88$  in  $\text{CH}_2\text{Cl}_2$ ).

Dr value determined by  $^1\text{H NMR}$  analysis after flash filtration to reaction mixture with a thin silica gel: 78:22.

**SFC** Daicel chiralcel OX-3,  $\text{CO}_2/\text{MeOH} = 80/20$ , flow rate = 1.5 mL/min,  $\lambda = 254$  nm,  $t_R$  (major) = 4.65 min,  $t_R$  (minor) = 7.21 min.

**$^1\text{H NMR}$**  (400 MHz,  $\text{Chloroform-d}$ )  $\delta = 7.71$  (d, 2H), 7.43 – 7.06 (m, 8H), 7.00 (d, 2H), 6.95 – 6.81 (m, 2H), 6.60 – 6.43 (m, 1H), 5.25 (s, 2H), 4.76 (d,  $J = 13.6$  Hz, 1H), 4.52 (d,  $J = 13.6$  Hz, 1H), 3.84 (s, 3H), 3.23 (d,  $J = 14.4$  Hz, 1H), 2.98 (d,  $J = 14.4$  Hz, 1H), 1.47 (s, 9H).

**$^{13}\text{C NMR}$**  (101 MHz,  $\text{CDCl}_3$ )  $\delta = 173.7, 172.3, 162.8, 155.7, 135.1, 132.6, 130.6, 129.4, 128.8, 128.8, 128.7, 128.0, 125.6, 113.9, 80.9, 64.5, 58.0, 55.6, 43.0, 38.5, 28.4$ .

**IR:** 3339, 1714, 1652, 1577  $\text{cm}^{-1}$ .

**HRMS** (FTMS+c ESI)  $m/z$ :  $[\text{M} + \text{H}]^+$  calcd for  $\text{C}_{31}\text{H}_{34}\text{N}_3\text{O}_6^+$  544.2442; Found 544.2437.

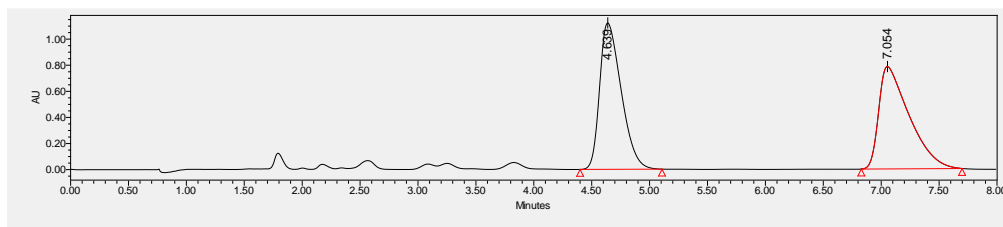

|   | Retention Time | % Area |
|---|----------------|--------|
| 1 | 4.639          | 50.32  |
| 2 | 7.054          | 49.68  |

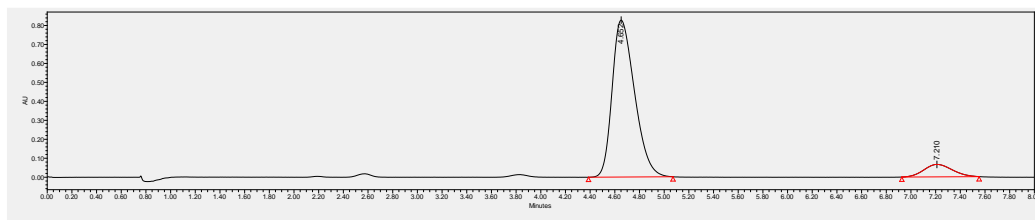

|   | Retention Time | % Area |
|---|----------------|--------|
| 1 | 4.652          | 90.85  |
| 2 | 7.210          | 9.15   |

**Tert-butyl ((3R,4R)-1,4-dibenzyl-4-(4-isopropylbenzamido)-2,5-dioxypyrrolidin-3-yl)carbamate C9**

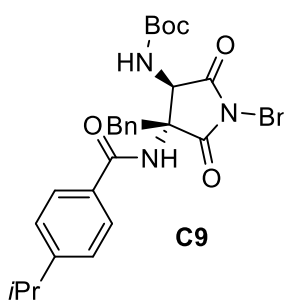

White solid; 43.3 mg, 78% yield, 90:10 er; melting point: 84–89 °C;  $[\alpha]_D^{17} = +53.0$  ( $c = 0.74$  in  $\text{CH}_2\text{Cl}_2$ ).

Dr value determined by  $^1\text{H NMR}$  analysis after flash filtration to reaction mixture with a thin silica gel: 85:15.

**SFC** Daicel chiralcel OX-3,  $\text{CO}_2/\text{MeOH} = 80/20$ , flow rate = 1.5 mL/min,  $\lambda = 254$  nm,  $t_R$  (major) = 3.86 min,  $t_R$  (minor) = 5.90 min.

**$^1\text{H NMR}$**  (400 MHz, Chloroform- $d$ )  $\delta = 7.67$  (d,  $J = 8.0$  Hz, 2H), 7.45 – 7.08 (m, 10H), 7.04 – 6.96 (m, 2H), 6.56 (s, 1H), 5.27 (s, 2H), 4.76 (d, 1H), 4.53 (d, 1H), 3.22 (d, 1H), 3.04 – 2.80 (m, 2H),

1.47 (s, 9H), 1.25 (d, 6H).

**$^{13}\text{C NMR}$**  (101 MHz,  $\text{CDCl}_3$ )  $\delta = 173.6, 172.3, 167.6, 153.5, 135.1, 132.6, 130.8, 130.6, 128.8, 128.8, 128.7, 128.0, 127.6, 126.8, 80.9, 64.5, 58.0, 43.0, 38.4, 34.3, 28.4, 23.9$ .

**IR**: 3338, 1713, 1654, 1525  $\text{cm}^{-1}$ .

**HRMS** (FTMS+c ESI)  $m/z$ :  $[\text{M} + \text{H}]^+$  calcd for  $\text{C}_{33}\text{H}_{38}\text{N}_3\text{O}_5^+$  556.2806; Found 556.2807.

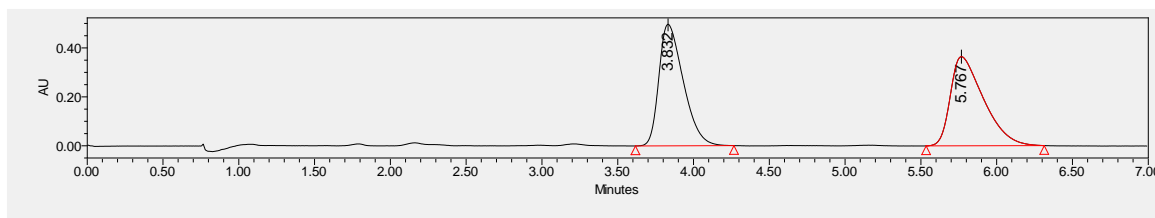

|   | Retention Time | % Area |
|---|----------------|--------|
| 1 | 3.832          | 50.08  |
| 2 | 5.767          | 49.92  |

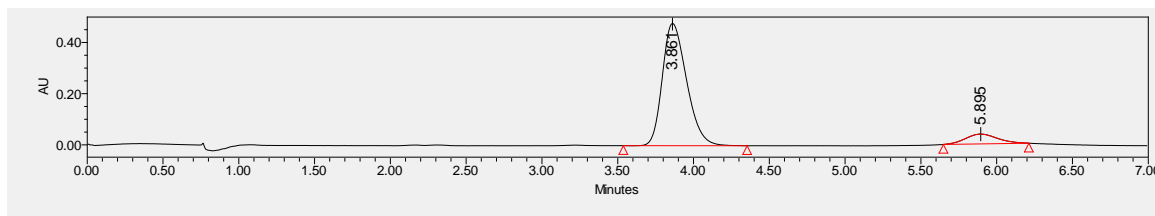

|   | Retention Time | % Area |
|---|----------------|--------|
| 1 | 3.861          | 90.46  |
| 2 | 5.895          | 9.54   |

**Tert-butyl ((3R,4R)-1,4-dibenzyl-4-(3-methylbenzamido)-2,5-dioxopyrrolidin-3-yl)carbamate C10**

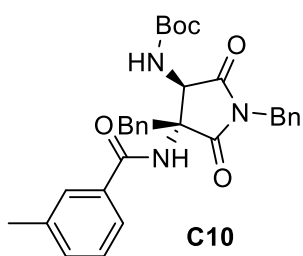

White solid; 39.5 mg, 75% yield, 92:18 er; melting point: 76–81 °C;  $[\alpha]_D^{16} = +45.5$  ( $c = 0.76$  in  $\text{CH}_2\text{Cl}_2$ ).

Dr value determined by  $^1\text{H NMR}$  analysis after flash filtration to reaction mixture with a thin silica gel: 81:19.

**SFC** Daicel chiralcel OX-3,  $\text{CO}_2/\text{MeOH} = 80/20$ , flow rate = 1.5 mL/min,  $\lambda = 254$  nm,  $t_R$  (major) = 3.35 min,  $t_R$  (minor) = 4.27 min.

**$^1\text{H NMR}$**  (400 MHz,  $\text{Chloroform-}d$ )  $\delta = 7.61 - 7.47$  (m, 2H), 7.45 – 7.08 (m, 10H), 7.06 – 6.95 (m, 2H), 6.59 (s, 1H), 5.28 (d, 2H), 4.76 (d,  $J = 13.6$  Hz, 1H), 4.51 (d,  $J = 13.6$  Hz, 1H), 3.24 (d,  $J = 14.4$  Hz, 1H), 3.00 (d,  $J = 14.4$  Hz, 1H), 2.38 (s, 3H), 1.61 – 1.24 (m, 9H).

**$^{13}\text{C NMR}$**  (101 MHz,  $\text{CDCl}_3$ )  $\delta = 173.6, 172.3, 167.9, 155.7, 138.6, 135.1, 133.3, 133.0, 132.5, 130.6, 128.8, 128.7, 128.6, 128.3, 128.0, 124.4, 80.9, 64.6, 57.9, 43.0, 38.4, 28.4, 21.4$ .

**IR:** 3308, 1708, 1653, 1497  $\text{cm}^{-1}$ .

**HRMS** (FTMS+c ESI)  $m/z$ :  $[\text{M} + \text{H}]^+$  calcd for  $\text{C}_{31}\text{H}_{34}\text{N}_3\text{O}_5^+$  528.2493; Found 528.2484.

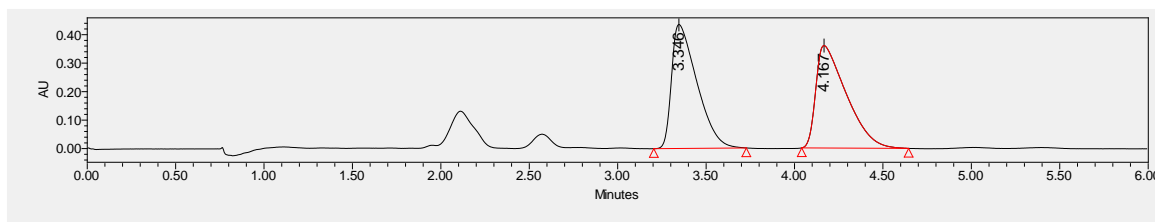

|   | Retention Time | % Area |
|---|----------------|--------|
| 1 | 3.346          | 50.23  |
| 2 | 4.167          | 49.77  |

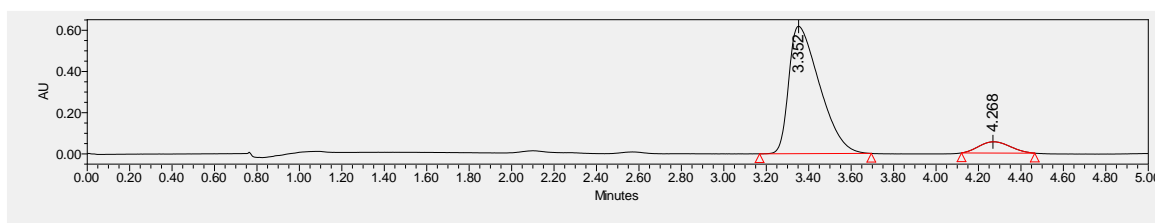

|   | Retention Time | % Area |
|---|----------------|--------|
| 1 | 3.352          | 91.72  |
| 2 | 4.268          | 8.28   |



### Tert-butyl ((3R,4R)-1,4-dibenzyl-4-(2-methylbenzamido)-2,5-dioxopyrrolidin-3-yl)carbamate C11

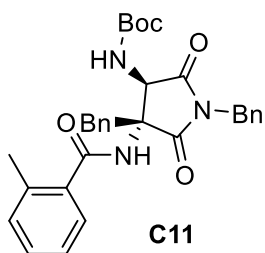

White solid; 36.9 mg, 70% yield, 87:13 er; melting point: 147–153 °C;  $[\alpha]_D^{17} = +44.7$  ( $c = 0.49$  in  $\text{CH}_2\text{Cl}_2$ ).

Dr value determined by  $^1\text{H}$  NMR analysis after flash filtration to reaction mixture with a thin silica gel: 73:27.

**SFC** Daicel chiralcel OX-3,  $\text{CO}_2/\text{MeOH} = 80/20$ , flow rate = 1.5 mL/min,  $\lambda = 254$  nm,  $t_R$  (major) = 12.91 min,  $t_R$  (minor) = 14.49 min.

**$^1\text{H}$  NMR** (400 MHz,  $\text{CDCl}_3$ )  $\delta = 7.53 - 7.05$  (m, 13H), 7.04 – 6.89 (m, 2H), 6.22 (s, 1H), 5.49 (s, 1H), 5.28 (s, 1H), 4.77 (d,  $J = 13.6$  Hz, 1H), 4.49 (d,  $J = 13.6$  Hz, 1H), 3.14 (d,  $J = 14.4$  Hz, 1H), 2.91 (d,  $J = 14.4$  Hz, 1H), 2.42 (s, 3H), 1.49 (s, 9H).

**$^{13}\text{C}$  NMR** (101 MHz,  $\text{CDCl}_3$ )  $\delta = 173.5, 172.4, 170.2, 155.8, 137.0, 135.1, 132.3, 131.1, 130.5, 128.8, 128.7, 128.1, 128.0, 127.3, 125.9, 80.9, 64.7, 57.4, 43.0, 38.5, 28.4, 19.7$ .

**IR**: 3325, 1716, 1655, 1498  $\text{cm}^{-1}$ .

**HRMS** (FTMS+c ESI)  $m/z$ :  $[\text{M} + \text{H}]^+$  calcd for  $\text{C}_{31}\text{H}_{34}\text{N}_3\text{O}_5^+$  528.2493; Found 528.2489.

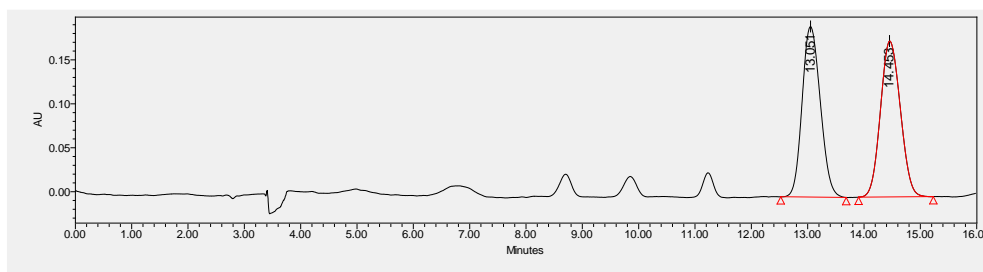

|   | Retention Time | % Area |
|---|----------------|--------|
| 1 | 13.051         | 50.06  |
| 2 | 14.453         | 49.94  |

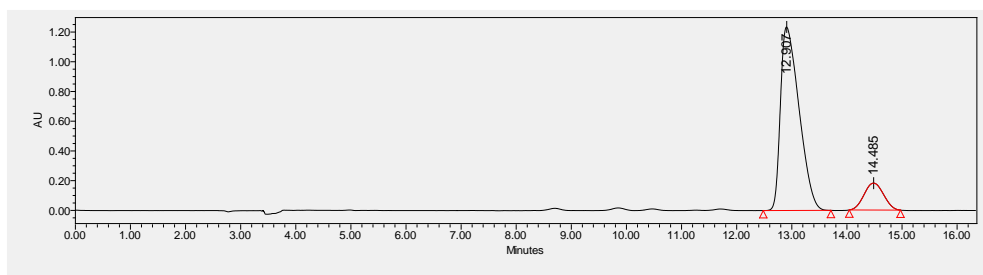

|   | Retention Time | % Area |
|---|----------------|--------|
| 1 | 12.907         | 86.64  |
| 2 | 14.485         | 13.36  |

**Tert-butyl ((3R,4R)-1,4-dibenzyl-4-(3,5-dimethylbenzamido)-2,5-dioxopyrrolidin-3-yl)carbamate C12**

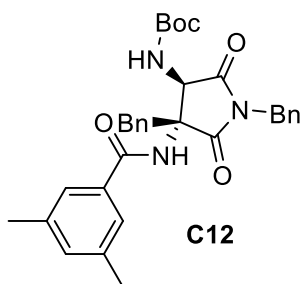

White solid; 48.7 mg, 90% yield, 90:10 er; melting point: 83–89 °C;  $[\alpha]_{D}^{17} = +37.8$  ( $c = 0.95$  in  $\text{CH}_2\text{Cl}_2$ ).

Dr value determined by  $^1\text{H NMR}$  analysis after flash filtration to reaction mixture with a thin silica gel: 91:9.

**SFC** Daicel chiralcel OX-3,  $\text{CO}_2/\text{MeOH} = 80/20$ , flow rate = 1.5 mL/min,  $\lambda = 254$  nm,  $t_R$  (major) = 3.27 min,  $t_R$  (minor) = 4.19 min.

**$^1\text{H NMR}$**  (400 MHz, Chloroform- $d$ )  $\delta = 7.55 - 7.08$  (m, 10H), 7.02 (d,  $J = 8.0$  Hz, 2H), 6.55 (s, 1H), 5.27 (d, 2H), 4.76 (d,  $J = 14.4$  Hz, 1H), 4.51 (d,  $J = 14.4$  Hz, 1H), 3.24 (d,  $J = 13.6$  Hz, 1H),

3.01 (d,  $J = 13.6$  Hz, 1H), 2.34 (s, 6H), 1.47 (s, 8H).

**$^{13}\text{C NMR}$**  (101 MHz,  $\text{CDCl}_3$ )  $\delta = 173.6, 172.3, 168.1, 155.7, 138.4, 135.1, 133.8, 133.26, 132.6, 130.6, 128.8, 128.7, 128.0, 125.2, 80.9, 64.5, 57.9, 43.0, 38.4, 28.4, 21.3$ .

**IR:** 3309, 1717, 1654, 1507  $\text{cm}^{-1}$ .

**HRMS** (FTMS+c ESI)  $m/z$ :  $[\text{M} + \text{H}]^+$  calcd for  $\text{C}_{32}\text{H}_{36}\text{N}_3\text{O}_5^+$  542.2650; Found 542.2641.

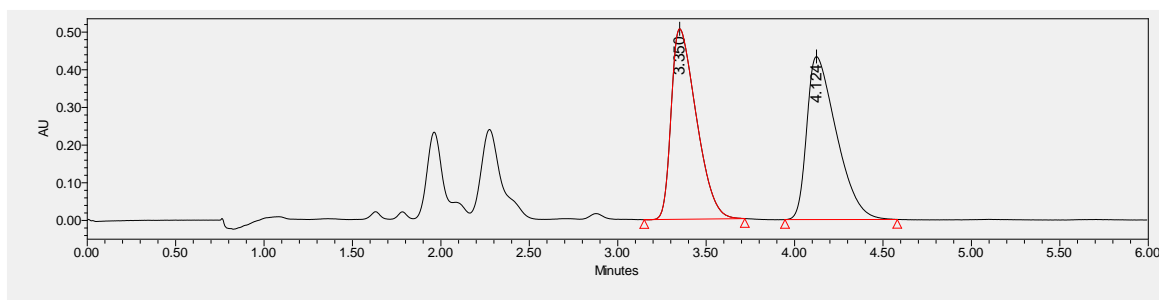

|   | Retention Time | % Area |
|---|----------------|--------|
| 1 | 3.350          | 49.75  |
| 2 | 4.124          | 50.25  |

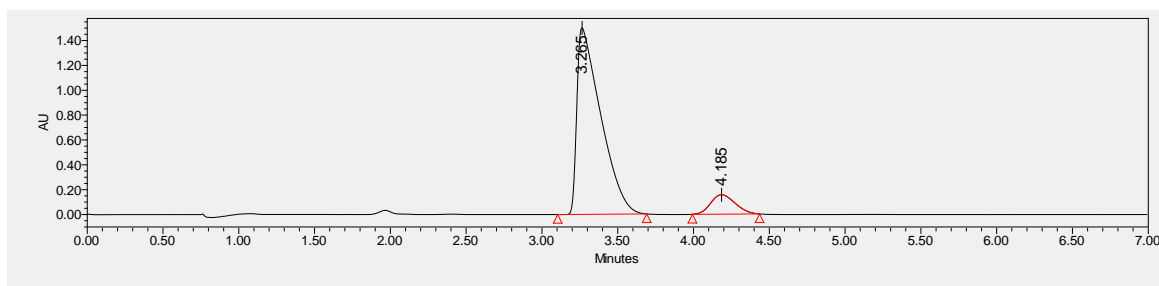

|   | Retention Time | % Area |
|---|----------------|--------|
| 1 | 3.265          | 90.33  |
| 2 | 4.185          | 9.67   |

**Tert-butyl ((3R,4R)-4-(1-naphthamido)-1,4-dibenzyl-2,5-dioxopyrrolidin-3-yl)carbamate C13**

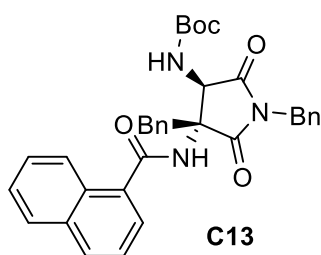

White solid; 32.1 mg, 57% yield, 85:15 er; melting point: 86–89 °C;  $[\alpha]^{16}_D = +42.0$  ( $c = 0.53$  in  $\text{CH}_2\text{Cl}_2$ ).

Dr value determined by  $^1\text{H}$  NMR analysis after flash filtration to reaction mixture with a thin silica gel: 73:27.

**SFC** Daicel chiralcel OX-3,  $\text{CO}_2/\text{MeOH} = 80/20$ , flow rate = 1.5 mL/min,  $\lambda = 254$  nm,  $t_R$  (major) = 4.98 min,  $t_R$  (minor) = 6.21 min.

**$^1\text{H}$  NMR** (400 MHz, Chloroform- $d$ )  $\delta = 8.31 - 8.22$  (m, 1H), 7.92 – 7.73 (m, 2H), 7.67 (d,  $J = 7.0$  Hz, 1H), 7.52 – 7.30 (m, 5H), 7.30 – 7.10 (m, 5H), 7.06 (t, 2H), 6.93 – 6.85 (m, 2H), 6.40 (s, 1H), 5.51 (s, 1H), 5.20 (s, 1H), 4.73 (d,  $J = 14.4$  Hz, 1H), 4.45 (d,  $J = 14.4$  Hz, 1H), 3.10 (d,  $J = 13.6$  Hz, 1H), 2.88 (d,  $J = 13.6$  Hz, 1H), 1.43 (s, 9H).

**$^{13}\text{C}$  NMR** (101 MHz,  $\text{CDCl}_3$ )  $\delta = 173.5, 172.4, 169.7, 155.8, 135.1, 133.7, 133.0, 132.3, 131.2, 130.5, 130.3, 128.9, 128.8, 128.3, 128.1, 128.0, 127.5, 126.6, 125.9, 125.6, 124.9, 81.0, 65.1, 57.5, 43.0, 38.6, 28.4$ .

**IR:** 3325, 1716, 1655, 1497  $\text{cm}^{-1}$ .

**HRMS** (FTMS+c ESI)  $m/z$ :  $[\text{M} + \text{H}]^+$  calcd for  $\text{C}_{34}\text{H}_{34}\text{N}_3\text{O}_5^+$  564.2493; Found 564.2498.

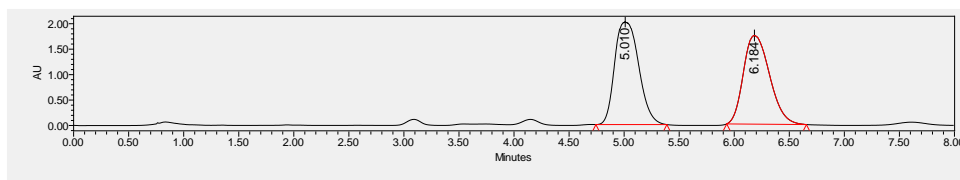

|   | Retention Time | % Area |
|---|----------------|--------|
| 1 | 5.010          | 51.07  |
| 2 | 6.184          | 48.93  |

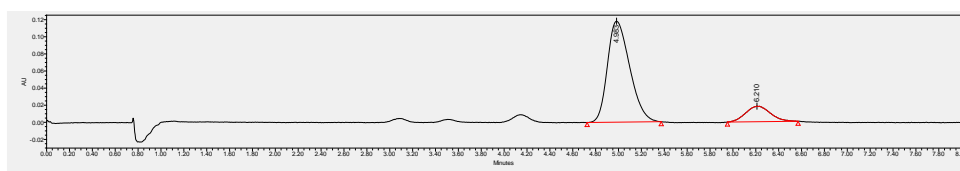

|   | Retention Time | % Area |
|---|----------------|--------|
| 1 | 4.983          | 85.48  |
| 2 | 6.210          | 14.52  |

**Tert-butyl ((3R,4R)-1,4-dibenzyl-2,5-dioxo-4-(thiophene-2-carboxamido)pyrrolidin-3-yl)carbamate C14**

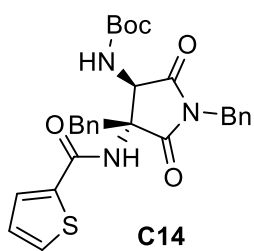

White solid; 35.3 mg, 68% yield, 79:21 er; melting point: 95–96 °C;  $[\alpha]_D^{17} = +21.7$  ( $c = 0.41$  in  $\text{CH}_2\text{Cl}_2$ ).

Dr value determined by  $^1\text{H NMR}$  analysis after flash filtration to reaction mixture with a thin silica gel: 72:28.

**SFC** Daicel chiralcel OX-3,  $\text{CO}_2/\text{MeOH} = 80/20$ , flow rate = 1.5 mL/min,  $\lambda = 254$  nm,  $t_R$  (major) = 3.78 min,  $t_R$  (minor) = 4.75 min.

**$^1\text{H NMR}$**  (400 MHz, Chloroform- $d$ )  $\delta = 7.54 - 7.45$  (m, 2H), 7.41 – 7.28 (m, 4H), 7.25 – 7.10 (m, 3H), 7.07 (dd, 1H), 6.99 (d,  $J = 7.6$  Hz, 2H), 6.47 (s, 1H), 5.48 – 5.09 (m, 2H), 4.75 (d,  $J = 14.4$  Hz, 1H), 4.52 (d,  $J = 14.4$  Hz, 1H), 3.23 (d,  $J = 13.6$  Hz, 1H), 2.98 (d,  $J = 13.6$  Hz, 1H), 1.47 (s, 9H).

**$^{13}\text{C NMR}$**  (101 MHz,  $\text{CDCl}_3$ )  $\delta = 173.4, 172.1, 162.1, 155.8, 137.3, 135.0, 131.2, 130.6, 129.5, 128.9, 128.8, 128.1, 127.9, 81.1, 64.6, 58.1, 43.1, 38.4, 28.4$ .

**IR:** 3350, 1714, 1647, 1533, 1497  $\text{cm}^{-1}$ .

**HRMS** (FTMS+c ESI)  $m/z$ :  $[\text{M} + \text{H}]^+$  calcd for  $\text{C}_{28}\text{H}_{30}\text{N}_3\text{O}_5\text{S}^+$  520.1901; Found 520.1897.

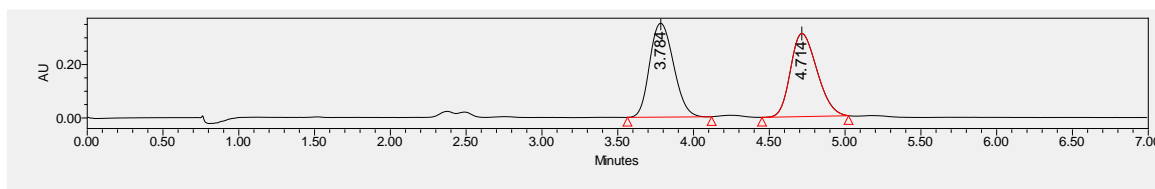

|   | Retention Time | % Area |
|---|----------------|--------|
| 1 | 3.784          | 50.49  |
| 2 | 4.714          | 49.51  |

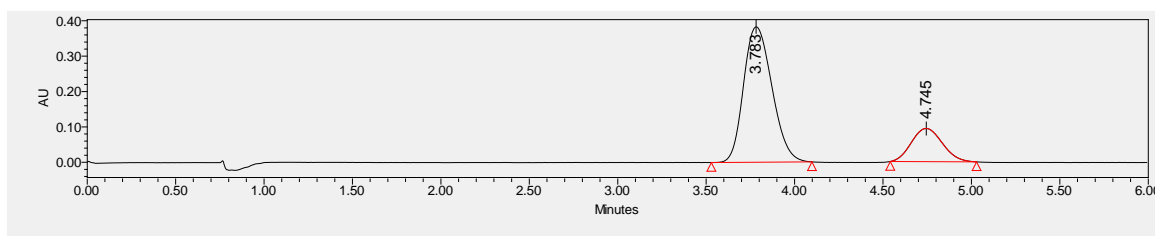

|   | Retention Time | % Area |
|---|----------------|--------|
| 1 | 3.783          | 78.95  |
| 2 | 4.745          | 21.05  |

**Tert-butyl ((3R,4R)-4-benzamido-1-benzyl-4-(4-bromobenzyl)-2,5-dioxopyrrolidin-3-yl)carbamate C15**

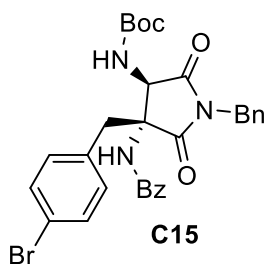

White solid; 44.3 mg, 75% yield, 91:9 er; melting point: 95–98 °C;  $[\alpha]_D^{17} = +17.0$  ( $c = 0.8$  in  $\text{CH}_2\text{Cl}_2$ ).

Dr value determined by  $^1\text{H}$  NMR analysis after flash filtration of reaction mixture with a thin silica gel: 76:24.

**SFC** Daicel chiralcel OX-3,  $\text{CO}_2/\text{MeOH} = 80/20$ , flow rate = 1.5 mL/min,  $\lambda = 254$  nm,  $t_R$  (major) = 3.43 min,  $t_R$  (minor) = 4.31 min.

**$^1\text{H}$  NMR** (400 MHz,  $\text{Chloroform-}d$ )  $\delta = 7.82 - 7.69$  (m, 2H), 7.61 – 7.50 (m, 1H), 7.44 (t,  $J = 7.6$  Hz, 2H), 7.34 (dt, 5H), 7.16 (d,  $J = 7.9$  Hz, 2H), 6.80 (d,  $J = 8.4$  Hz, 2H), 6.61 (s, 1H), 5.30 (s, 1H), 5.15 (s, 1H), 4.76 (d,  $J = 14.2$  Hz, 1H), 4.56 (d,  $J = 14.2$  Hz, 1H), 3.17 (d,  $J = 13.6$  Hz, 1H), 2.94 (d,  $J = 13.6$  Hz, 1H), 1.47 (s, 9H).

**$^{13}\text{C}$  NMR** (101 MHz,  $\text{CDCl}_3$ )  $\delta = 173.3, 172.1, 167.7, 155.8, 135.0, 132.4, 132.2, 131.7, 131.4, 129.1, 128.8, 128.8, 128.2, 127.4, 122.16, 81.1, 64.5, 58.2, 43.2, 37.8, 28.4$ .

**IR:** 1716, 1654, 1488  $\text{cm}^{-1}$ .

**HRMS** (FTMS+c ESI)  $m/z$ :  $[\text{M} + \text{H}]^+$  calcd for  $\text{C}_{30}\text{H}_{31}\text{N}_3\text{O}_5\text{Br}^+$  592.1442, 593.1475; Found 592.1433, 593.1461.

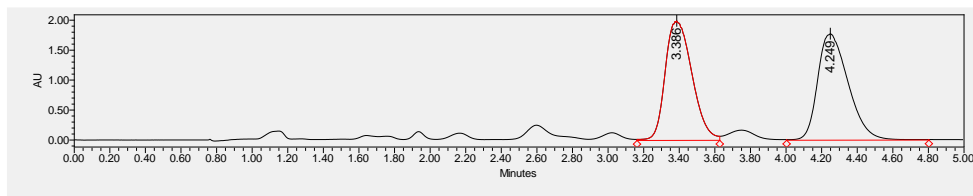

|   | Retention Time | % Area |
|---|----------------|--------|
| 1 | 3.386          | 49.58  |
| 2 | 4.249          | 50.42  |

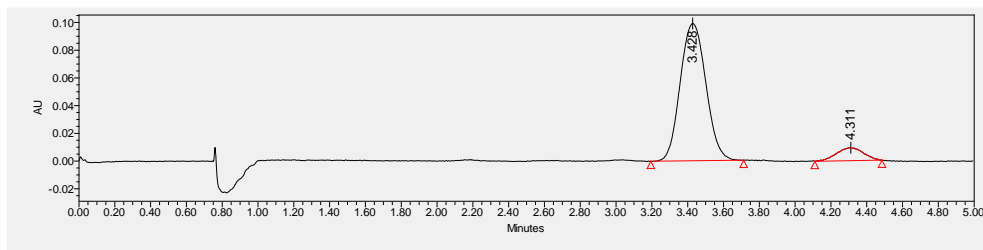

|   | Retention Time | % Area |
|---|----------------|--------|
| 1 | 3.428          | 91.04  |
| 2 | 4.311          | 8.96   |

**Tert-butyl ((3R,4R)-4-benzamido-1-benzyl-4-(4-methoxybenzyl)-2,5-dioxopyrrolidin-3-yl)carbamate C16**

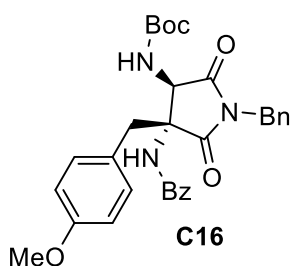

White solid; 43.4 mg, 80% yield, 91:9 er; melting point: 83–86 °C;  $[\alpha]_D^{16} = +29.3$  ( $c = 0.35$  in  $\text{CH}_2\text{Cl}_2$ ).

Dr value determined by  $^1\text{H NMR}$  analysis after flash filtration of reaction mixture with a thin silica gel: 80:20.

**SFC** Daicel chiralcel OX-3,  $\text{CO}_2/\text{MeOH} = 80/20$ , flow rate = 1.5 mL/min,  $\lambda = 254$  nm,  $t_R$  (major) = 3.63 min,  $t_R$  (minor) = 4.57 min.

**$^1\text{H NMR}$**  (400 MHz, Chloroform- $d$ )  $\delta = 7.76$  (d,  $J = 7.6$  Hz, 2H), 7.58 – 7.48 (m, 1H), 7.48 – 7.22 (m, 8H), 6.96 – 6.83 (m, 2H), 6.64 (d,  $J = 8.1$  Hz, 2H), 5.25 (s, 2H), 4.76 (d,  $J = 14.4$  Hz, 1H), 4.54 (d,  $J = 14.4$  Hz, 1H), 3.17 (d,  $J = 13.6$  Hz, 1H), 2.94 (d,  $J = 13.6$  Hz, 1H), 1.45 (m, 9H).

**$^{13}\text{C NMR}$**  (101 MHz,  $\text{CDCl}_3$ )  $\delta = 173.7, 172.4, 159.3, 155.8, 135.1, 132.2, 131.6, 128.9, 1288, 128.0, 127.5, 114.1, 64.7, 57.8, 55.3, 43.0, 37.8, 28.4$ .

**IR:** 3649, 1716, 1654, 1513  $\text{cm}^{-1}$ .

**HRMS** (FTMS+c ESI)  $m/z$ :  $[\text{M} + \text{H}]^+$  calcd for  $\text{C}_{31}\text{H}_{34}\text{N}_3\text{O}_6^+$  544.2442; Found 544.2445.

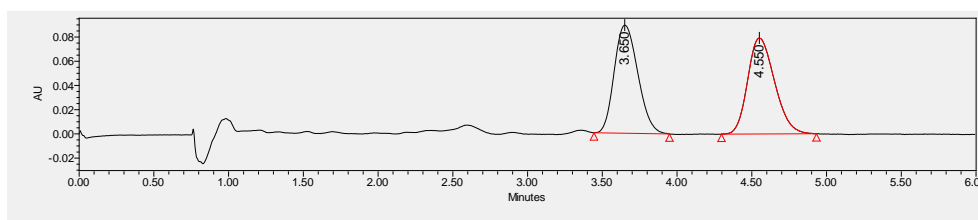

|   | Retention Time | % Area |
|---|----------------|--------|
| 1 | 3.650          | 49.78  |
| 2 | 4.550          | 50.22  |

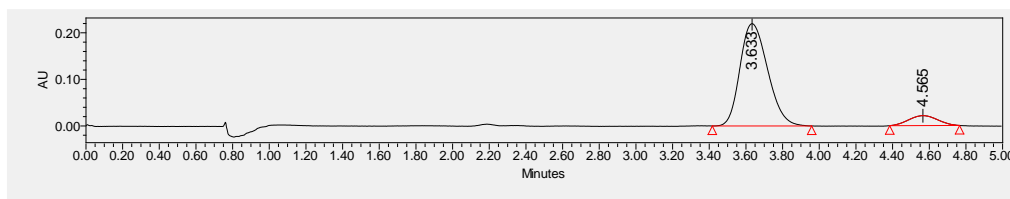

|   | Retention Time | % Area |
|---|----------------|--------|
| 1 | 3.633          | 90.81  |
| 2 | 4.565          | 9.19   |

**Tert-butyl ((3R,4R)-4-benzamido-1-benzyl-4-(4-methylbenzyl)-2,5-dioxopyrrolidin-3-yl)carbamate C17**

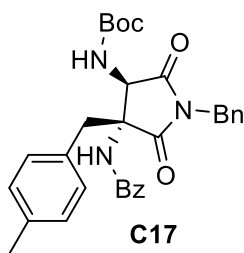

White solid; 45.3 mg, 86% yield, 90:10 er; melting point: 87–90 °C;  $[\alpha]_D^{16} = +16.0$  ( $c = 0.73$  in  $\text{CH}_2\text{Cl}_2$ ).

Dr value determined by  $^1\text{H NMR}$  analysis after flash filtration of reaction mixture with a thin silica gel: 87:13.

**SFC** Daicel chiralcel OX-3,  $\text{CO}_2/\text{MeOH} = 80/20$ , flow rate = 1.5 mL/min,  $\lambda = 254$  nm,  $t_R$  (major) = 3.09 min,  $t_R$  (minor) = 4.12 min.

**$^1\text{H NMR}$**  (400 MHz, Chloroform- $d$ )  $\delta = 7.54 - 7.43$  (m, 2H), 7.41 – 7.09 (m, 9H), 7.07 (dd, 1H), 6.99 (d,  $J = 7.4$  Hz, 2H), 6.53 – 6.38 (m, 1H), 5.24 (d, 2H), 4.75 (d,  $J = 14.4$  Hz, 1H), 4.52 (d,  $J = 14.4$  Hz, 1H), 3.23 (d,  $J = 13.6$  Hz, 1H), 2.98 (d,  $J = 13.6$  Hz, 1H), 1.45 (m, 12H).

**$^{13}\text{C NMR}$**  (101 MHz,  $\text{CDCl}_3$ )  $\delta = 173.4, 172.1, 137.4, 135.0, 131.2, 130.6, 129.5, 128.9, 128.8, 128.1, 127.9, 127.7, 81.0, 64.6, 58.1, 43.0, 38.4, 28.4, 26.2$ .

**IR:** 3338, 2926, 1713, 1646, 1534  $\text{cm}^{-1}$ .

**HRMS** (FTMS+c ESI)  $m/z$ :  $[\text{M} + \text{H}]^+$  calcd for  $\text{C}_{31}\text{H}_{34}\text{N}_3\text{O}_5^+$  528.2493; Found 528.2491.

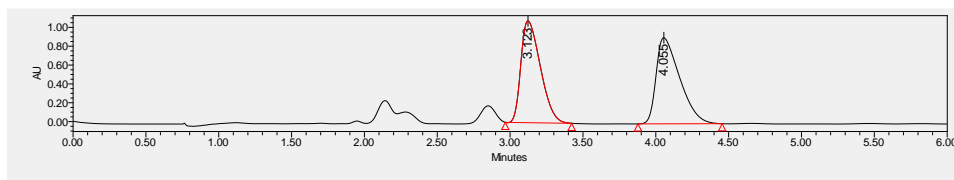

|   | Retention Time | % Area |
|---|----------------|--------|
| 1 | 3.123          | 49.43  |
| 2 | 4.055          | 50.57  |

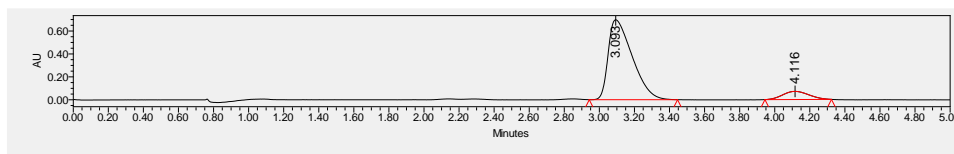

|   | Retention Time | % Area |
|---|----------------|--------|
| 1 | 3.093          | 90.01  |
| 2 | 4.116          | 9.99   |

**Tert-butyl ((3R,4R)-4-benzamido-1-benzyl-4-(2-methylbenzyl)-2,5-dioxopyrrolidin-3-yl)carbamate C18**

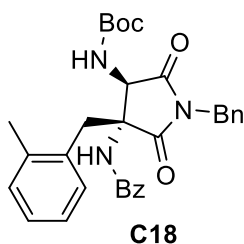

White solid; 37.4 mg, 71% yield, 91:9 er; melting point: 80–83 °C;  $[\alpha]_D^{17} = +62.0$  ( $c = 0.61$  in  $\text{CH}_2\text{Cl}_2$ ).

Dr value determined by  $^1\text{H NMR}$  analysis after flash filtration of reaction mixture with a thin silica gel: 75:25.

**SFC** Daicel chiralcel OX-3,  $\text{CO}_2/\text{MeOH} = 80/20$ , flow rate = 1.5 mL/min,  $\lambda = 254$  nm,  $t_R$  (major) = 4.22 min,  $t_R$  (minor) = 5.27 min.

**$^1\text{H NMR}$**  (400 MHz, Chloroform- $d$ )  $\delta = 7.63$  (d,  $J = 7.6$  Hz, 2H), 7.55 – 7.27 (m, 8H), 7.17 (d,  $J = 5.6$  Hz, 2H), 6.94 (d,  $J = 7.6$  Hz, 1H), 6.54 (s, 1H), 5.37 (d, 2H), 4.87 (d,  $J = 14.2$  Hz, 1H), 4.71 (d,  $J = 14.2$  Hz, 1H), 3.30 (d,  $J = 14.6$  Hz, 1H), 2.92 (d,  $J = 14.6$  Hz, 1H), 2.16 (s, 3H), 1.46 (s, 9H).

**$^{13}\text{C NMR}$**  (101 MHz,  $\text{CDCl}_3$ )  $\delta = 173.9, 172.3, 167.7, 155.7, 137.7, 135.2, 132.2, 131.2, 131.1, 129.0, 128.8, 128.8, 128.2, 127.3, 126.3, 80.9, 63.6, 58.5, 43.2, 33.6, 28.3, 19.8$ .

**IR:** 3325, 1791, 1656, 1508  $\text{cm}^{-1}$ .

**HRMS** (FTMS+c ESI)  $m/z$ :  $[\text{M} + \text{H}]^+$  calcd for  $\text{C}_{31}\text{H}_{34}\text{N}_3\text{O}_5^+$  528.2493; Found 528.2500.

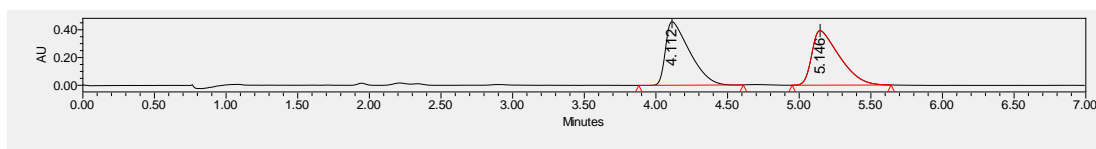

|   | Retention Time | % Area |
|---|----------------|--------|
| 1 | 4.112          | 50.34  |
| 2 | 5.146          | 49.66  |

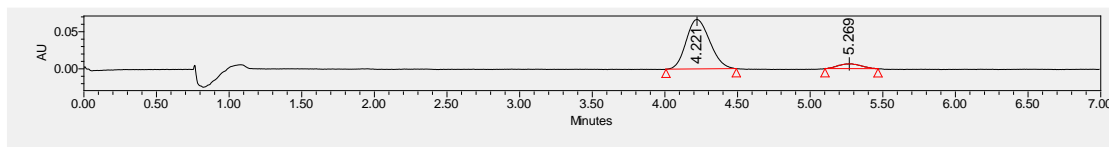

|   | Retention Time | % Area |
|---|----------------|--------|
| 1 | 4.221          | 91.30  |
| 2 | 5.269          | 8.70   |



**Tert-butyl ((3R,4R)-4-benzamido-1-benzyl-4-(naphthalen-1-ylmethyl)-2,5-dioxopyrrolidin-3-yl)carbamate C19**

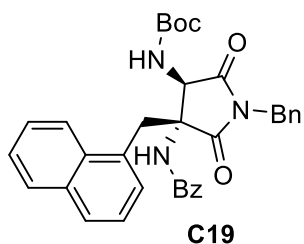

White solid; 37.7 mg, 67% yield, 92:8 er; melting point: 94–100 °C;  $[\alpha]^{16}_D = +30.8$  ( $c = 0.70$  in  $\text{CH}_2\text{Cl}_2$ ).

Dr value determined by  $^1\text{H NMR}$  analysis after flash filtration of reaction mixture with a thin silica gel: 80:20.

**SFC** Daicel chiralcel OX-3,  $\text{CO}_2/\text{MeOH} = 80/20$ , flow rate = 1.5 mL/min,  $\lambda = 254$  nm,  $t_R$  (major) = 7.15 min,  $t_R$  (minor) = 10.20 min.

**$^1\text{H NMR}$**  (400 MHz, Chloroform- $d$ )  $\delta = 8.06$  (m, 1H), 7.98 – 7.87 (m, 1H), 7.81 (m, 1H), 7.61 – 7.44 (m, 4H), 7.44 – 7.05 (m, 9H), 7.02 – 6.87 (m, 1H), 6.71 (s, 1H), 5.44 (d, 2H), 4.88 (d,  $J = 14.0$  Hz, 1H), 4.73 (d,  $J = 14.0$  Hz, 1H), 3.90 (d, 1H), 3.09 (d, 1H), 1.50 (s, 9H).

**$^{13}\text{C NMR}$**  (101 MHz,  $\text{CDCl}_3$ )  $\delta = 173.2, 172.4, 167.5, 135.5, 134.1, 132.9, 132.1, 130.3, 129.8, 129.0, 128.9, 128.5, 128.3, 127.2, 127.2, 125.9, 125.5, 122.7, 81.0, 64.2, 58.5, 43.2, 33.0, 28.4$ .

**IR:** 3432, 1715, 1663, 1512, 1484  $\text{cm}^{-1}$ .

**HRMS** (FTMS+c ESI)  $m/z$ :  $[\text{M} + \text{H}]^+$  calcd for  $\text{C}_{34}\text{H}_{34}\text{N}_3\text{O}_5^+$  564.2493; Found 564.2491.

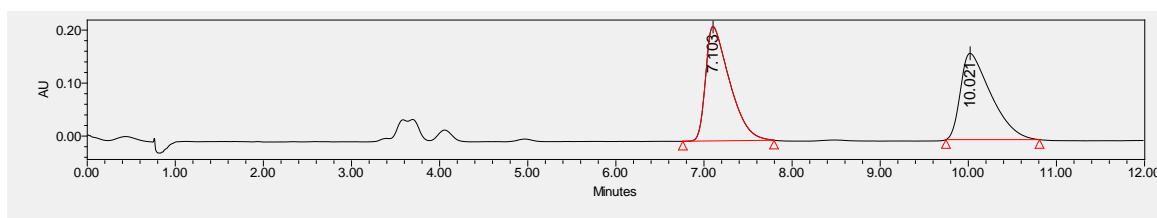

|   | Retention Time | % Area |
|---|----------------|--------|
| 1 | 7.103          | 51.01  |
| 2 | 10.021         | 48.99  |

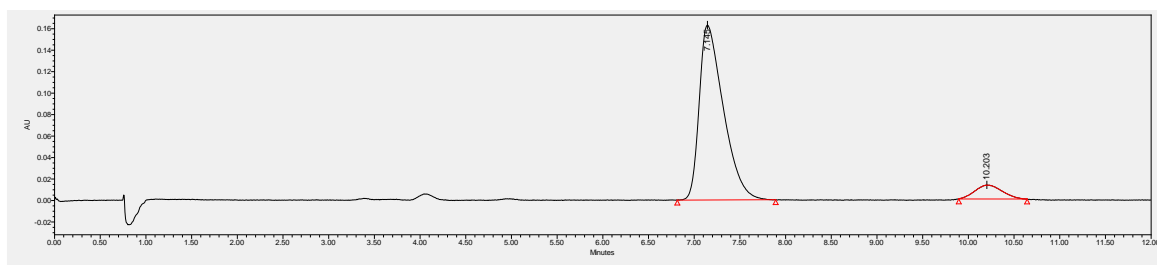

|   | Retention Time | % Area |
|---|----------------|--------|
| 1 | 7.145          | 91.77  |
| 2 | 10.203         | 8.23   |

**Tert-butyl ((3R,4R)-4-benzamido-1-benzyl-4-(naphthalen-2-ylmethyl)-2,5-dioxopyrrolidin-3-yl)carbamate C20**

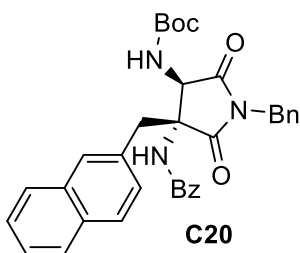

White solid; 38.3 mg, 68% yield, 91:9 er; melting point: 97–101 °C;  $[\alpha]_D^{16} = +6.3$  ( $c = 0.73$  in  $\text{CH}_2\text{Cl}_2$ ).

Dr value determined by  $^1\text{H NMR}$  analysis after flash filtration of reaction mixture with a thin silica gel: 81:19.

**SFC** Daicel chiralcel OX-3,  $\text{CO}_2/\text{MeOH} = 80/20$ , flow rate = 1.5 mL/min,  $\lambda = 254$  nm,  $t_R$  (major) = 5.19 min,  $t_R$  (minor) = 7.60 min.

**$^1\text{H NMR}$**  (400 MHz, Chloroform- $d$ )  $\delta = 7.75 - 7.55$ (m, 5H), 7.55 – 7.21 (m, 12H), 7.06 (dd, 1H), 6.70 (s, 1H), 5.33 (d, 2H), 4.80 (d,  $J = 14.4$  Hz, 1H), 4.52 (d,  $J = 14.4$  Hz, 1H), 3.41 (d,  $J = 13.6$  Hz, 1H), 3.15 (d,  $J = 13.6$  Hz, 1H), 1.50 (s, 9H).

**$^{13}\text{C NMR}$**  (101 MHz,  $\text{CDCl}_3$ )  $\delta = 173.6, 172.3, 167.7, 155.8, 135.1, 133.2, 132.8, 132.2, 129.9, 128.8, 128.7, 128.3, 128.0, 127.8, 127.4, 126.6, 126.4, 80.9, 64.6, 58.1, 43.0, 38.6, 28.4$ .

**IR**: 3308, 1655, 1702, 1509  $\text{cm}^{-1}$ .

**HRMS** (FTMS+c ESI)  $m/z$ :  $[\text{M} + \text{H}]^+$  calcd for  $\text{C}_{34}\text{H}_{34}\text{N}_3\text{O}_5^+$  564.2493; Found 564.2487.

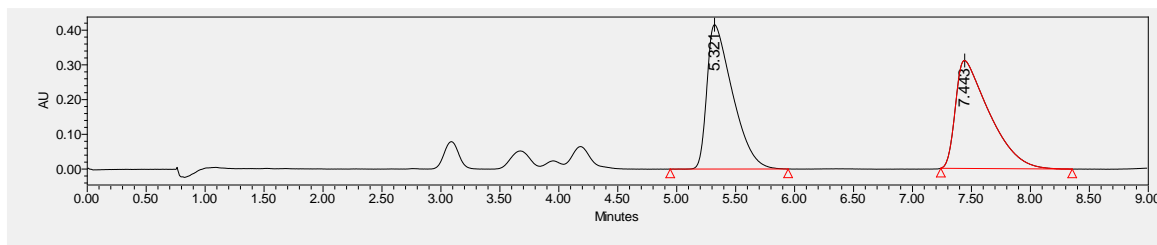

|   | Retention Time | % Area |
|---|----------------|--------|
| 1 | 5.321          | 50.32  |
| 2 | 7.443          | 49.68  |

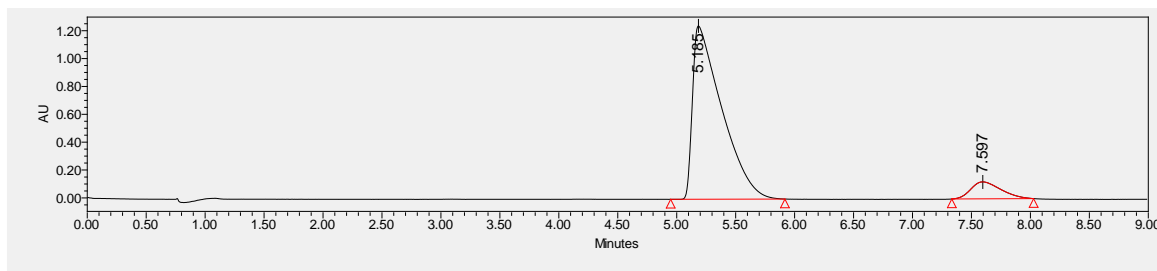

|   | Retention Time | % Area |
|---|----------------|--------|
| 1 | 5.185          | 90.85  |
| 2 | 7.597          | 9.15   |

**Tert-butyl ((3R,4R)-4-benzamido-1-benzyl-2,5-dioxo-4-(thiophen-2-ylmethyl)pyrrolidin-3-yl)carbamate C21**

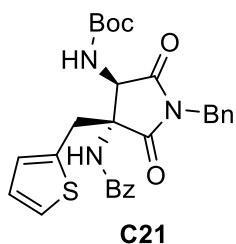

White solid; 41.0 mg, 79% yield, 90:10 er; melting point: 74–79 °C;  $[\alpha]_D^{17} = +46.1$  ( $c = 0.80$  in  $\text{CH}_2\text{Cl}_2$ ).

Dr value determined by  $^1\text{H}$  NMR analysis after flash filtration of reaction mixture with a thin silica gel: 81:19.

**SFC** Daicel chiralcel OX-3,  $\text{CO}_2/\text{MeOH} = 80/20$ , flow rate = 1.5 mL/min,  $\lambda = 254$  nm,  $t_R$  (major) = 3.28 min,  $t_R$  (minor) = 3.97 min.

**$^1\text{H}$  NMR** (400 MHz,  $\text{Chloroform-d}$ )  $\delta = 7.72$  (d,  $J = 7.6$  Hz, 2H), 7.53 – 7.41 (m, 1H), 7.36 (dd,  $J = 8.2, 6.8$  Hz, 2H), 7.30 – 7.14 (m, 5H), 7.04 (d,  $J = 5.1$  Hz, 1H), 6.65 (d, 3H), 5.32 (s, 1H), 5.10 (s, 1H), 4.66 (d,  $J = 14.4$  Hz, 1H), 4.47 (d,  $J = 14.4$  Hz, 1H), 3.36 (d,  $J = 14.4$  Hz, 1H), 3.23 (d,  $J = 14.4$  Hz, 1H), 1.39 (s, 9H).

**$^{13}\text{C}$  NMR** (101 MHz,  $\text{CDCl}_3$ )  $\delta = 173.5, 172.3, 167.7, 155.9, 135.0, 133.3, 133.1, 132.3, 129.6, 128.8, 128.7, 127.9, 127.5, 127.4, 126.2, 81.0, 64.4, 57.7, 43.1, 32.7, 28.4$ .

**IR:** 3339, 1714, 1654, 1508  $\text{cm}^{-1}$ .

**HRMS** (FTMS+c ESI)  $m/z$ :  $[\text{M} + \text{H}]^+$  calcd for  $\text{C}_{28}\text{H}_{30}\text{N}_3\text{O}_5\text{S}^+$  520.1901; Found 520.1896.

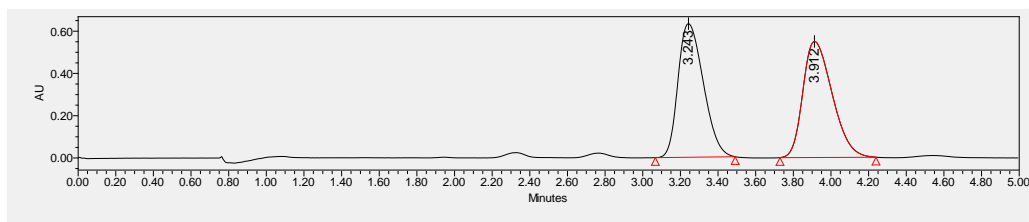

|   | Retention Time | % Area |
|---|----------------|--------|
| 1 | 3.243          | 49.89  |
| 2 | 3.912          | 50.11  |

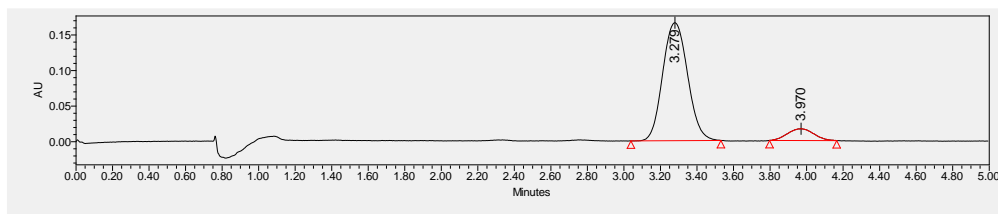

|   | Retention Time | % Area |
|---|----------------|--------|
| 1 | 3.279          | 90.47  |
| 2 | 3.970          | 9.53   |

**Tert-butyl ((3R,4R)-4-benzamido-1-benzyl-2,5-dioxo-4-phenethylpyrrolidin-3-yl)carbamate C22**

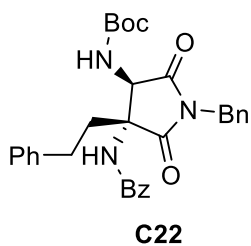

White solid; 30.0 mg, 57% yield, 87:13 er; melting point: 70–73 °C;  $[\alpha]_D^{17} = +6.1$  ( $c = 0.49$  in  $\text{CH}_2\text{Cl}_2$ ).

Dr value determined by  $^1\text{H NMR}$  analysis after flash filtration of reaction mixture with a thin silica gel: 61:39.

**SFC** Daicel chiralcel OX-3,  $\text{CO}_2/\text{MeOH} = 80/20$ , flow rate = 1.5 mL/min,  $\lambda = 254$  nm,  $t_R$  (major) = 3.02 min,  $t_R$  (minor) = 3.52 min.

**$^1\text{H NMR}$**  (400 MHz, Chloroform- $d$ )  $\delta = 7.65$  (m, 2H), 7.49 (m, 3H), 7.43 – 7.16 (m, 8H), 7.04 (m, 2H), 6.51 (s, 1H), 5.23 (d, 2H), 4.87 (d,  $J = 14.4$  Hz, 1H), 4.79 (d,  $J = 14.4$  Hz, 1H), 2.66 – 2.31 (m, 2H), 2.19 (m, 1H), 1.92 – 1.78 (m, 1H), 1.41 (s, 9H).

**$^{13}\text{C NMR}$**  (101 MHz,  $\text{CDCl}_3$ )  $\delta = 173.6, 172.8, 167.6, 155.9, 140.3, 135.4, 133.0, 132.2, 128.9, 128.9, 128.7, 128.4, 128.2, 127.5, 126.7, 80.9, 63.7, 58.1, 43.2, 34.6, 29.4, 28.3$ .

**IR:** 3337, 1704, 1654, 1521  $\text{cm}^{-1}$ .

**HRMS** (FTMS+c ESI)  $m/z$ :  $[\text{M} + \text{H}]^+$  calcd for  $\text{C}_{31}\text{H}_{34}\text{N}_3\text{O}_5^+$  528.2493; Found 528.2488.

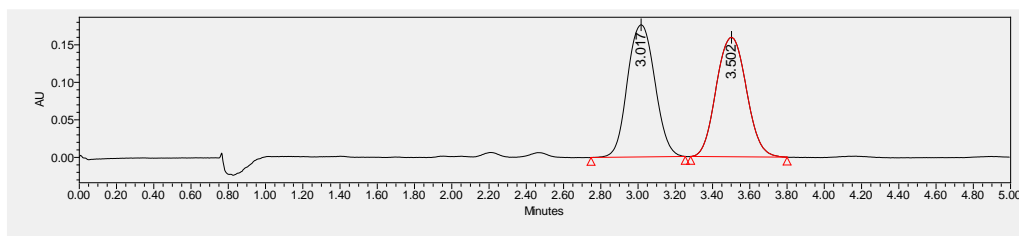

|   | Retention Time | % Area |
|---|----------------|--------|
| 1 | 3.017          | 50.17  |
| 2 | 3.502          | 49.83  |

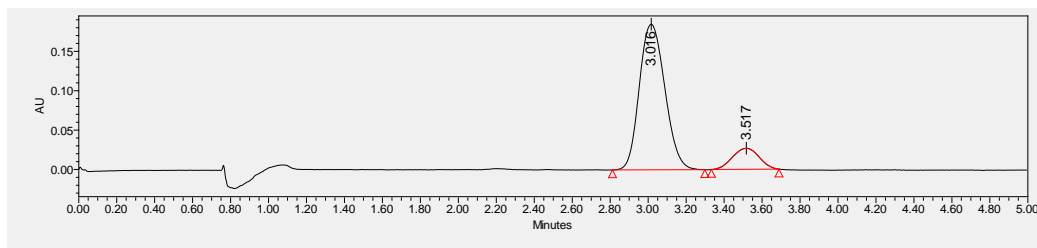

|   | Retention Time | % Area |
|---|----------------|--------|
| 1 | 3.016          | 86.94  |
| 2 | 3.517          | 13.06  |

**Tert-butyl ((3R,4R)-1-benzyl-4-(4-fluorobenzyl)-4-(4-methylbenzamido)-2,5-dioxopyrrolidin-3-yl)carbamate C23**

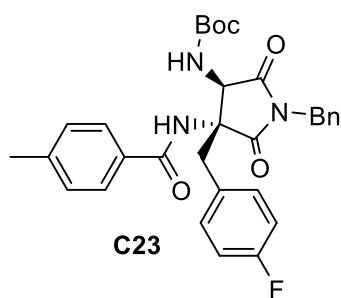

White solid; 46.4 mg, 85% yield, 93:7 er; melting point: 86–88 °C;  $[\alpha]_D^{16} = +40.6$  ( $c = 1.02$  in  $\text{CH}_2\text{Cl}_2$ ).

Dr value determined by  $^1\text{H NMR}$  analysis after flash filtration of reaction mixture with a thin silica gel: 85:15.

**SFC** Daicel chiralcel OX-3,  $\text{CO}_2/\text{MeOH} = 80/20$ , flow rate = 1.5 mL/min,  $\lambda = 254$  nm,  $t_R$  (major) = 2.78 min,  $t_R$  (minor) = 3.37 min.

**$^1\text{H NMR}$**  (400 MHz,  $\text{Chloroform-}d$ )  $\delta = 7.65$  (d,  $J = 7.8$  Hz, 2H), 7.41 – 7.27 (m, 5H), 7.23 (d,  $J = 8.0$  Hz, 2H), 6.92 (dd, 2H), 6.75 (t, 2H), 6.58 (s, 1H), 5.24 (m, 2H), 4.75 (d,  $J = 14.4$  Hz, 1H), 4.54 (d,  $J = 14.4$  Hz, 1H), 3.19 (d,  $J = 14.0$  Hz, 1H), 2.98 (d,  $J = 14.0$  Hz, 1H), 2.39 (s, 3H), 1.46 (s, 9H).

**$^{13}\text{C NMR}$**  (101 MHz,  $\text{CDCl}_3$ )  $\delta = 173.5, 172.3, 167.7, 163.6, 161.1, 142.9, 135.0, 132.2$  (d,  $J = 31.6$  Hz), 130.3, 129.5, 129.0, 128.8, 128.1, 127.4, 115.5 (d,  $J = 84.0$  Hz), 81.0, 64.5, 58.1, 43.1, 37.5, 28.4, 21.7.

**$^{19}\text{F NMR}$**  (377 MHz,  $\text{CDCl}_3$ )  $\delta = -113.99$ .

**IR:** 3325, 1706, 1653, 1498  $\text{cm}^{-1}$ .

**HRMS** (FTMS+c ESI)  $m/z$ :  $[\text{M} + \text{H}]^+$  calcd for  $\text{C}_{31}\text{H}_{33}\text{N}_3\text{O}_5\text{F}^+$  546.2398; Found 546.2394.

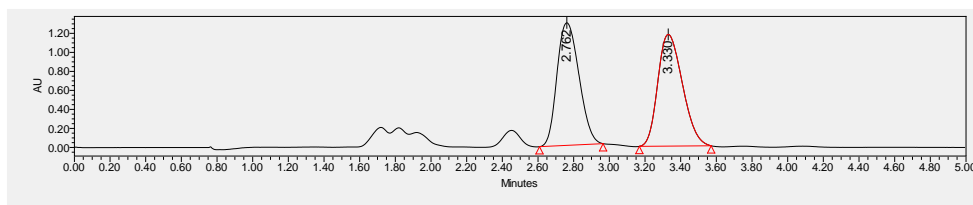

|   | Retention Time | % Area |
|---|----------------|--------|
| 1 | 2.762          | 49.55  |
| 2 | 3.330          | 50.45  |

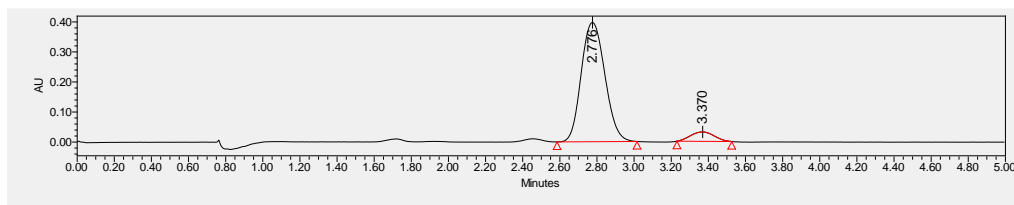

|   | Retention Time | % Area |
|---|----------------|--------|
| 1 | 2.776          | 92.70  |
| 2 | 3.370          | 7.30   |

**Tert-butyl ((3R,4R)-1-benzyl-4-(4-chlorobenzyl)-4-(4-methylbenzamido)-2,5-dioxopyrrolidin-3-yl)carbamate C24**

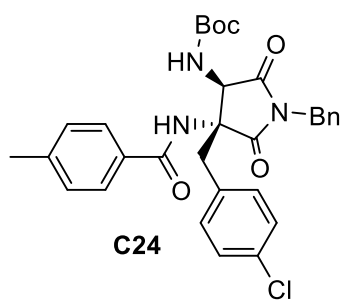

White solid; 43.8 mg, 78% yield, 93:7 er, >19:1 dr; melting point: 96–100 °C;  $[\alpha]_D^{16} = +28.6$  ( $c = 0.86$  in  $\text{CH}_2\text{Cl}_2$ ).

Dr value determined by  $^1\text{H NMR}$  analysis after flash filtration of reaction mixture with a thin silica gel: 86:14.

**SFC** Daicel chiralcel OX-3,  $\text{CO}_2/\text{MeOH} = 80/20$ , flow rate = 1.5 mL/min,  $\lambda = 254$  nm,  $t_R$  (major) = 3.45 min,  $t_R$  (minor) = 4.60 min.

**$^1\text{H NMR}$**  (400 MHz, Chloroform- $d$ )  $\delta = 7.65$  (d,  $J = 7.8$  Hz, 2H), 7.39 – 7.29 (m, 5H), 7.23 (d, 2H), 7.01 (d,  $J = 8.0$  Hz, 2H), 6.86 (d,  $J = 8.4$  Hz, 2H), 6.57 (s, 1H), 5.29 (s, 1H), 5.13 (s, 1H), 4.76 (d,  $J = 14.4$  Hz, 1H), 4.55 (d,  $J = 14.4$  Hz, 1H), 3.19 (d,  $J = 13.6$  Hz, 1H), 2.96 (d,  $J = 13.6$  Hz, 1H), 2.40 (s, 3H), 1.46 (s, 9H).

**$^{13}\text{C NMR}$**  (101 MHz,  $\text{CDCl}_3$ )  $\delta = 173.4, 172.2, 167.7, 155.7, 142.9, 135.0, 133.9, 131.9, 131.0, 130.3, 129.5, 129.1, 128.8, 128.7, 128.2, 127.4, 81.1, 64.5, 58.3, 43.2, 37.7, 28.4, 21.7$ .

**IR:** 3325, 2927, 1710, 1654, 1524  $\text{cm}^{-1}$ .

**HRMS** (FTMS+c ESI)  $m/z$ :  $[\text{M} + \text{H}]^+$  calcd for  $\text{C}_{31}\text{H}_{33}\text{N}_3\text{O}_5\text{Cl}^+$  562.2103, 563.2137; Found 562.2105, 563.2129.

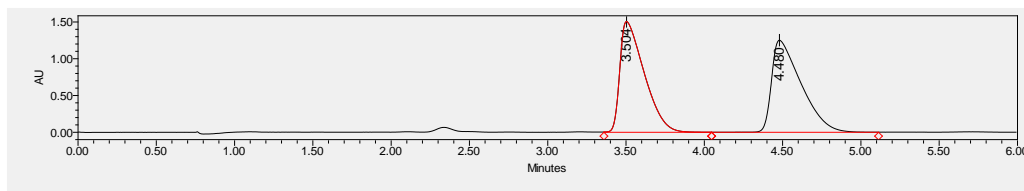

|   | Retention Time | % Area |
|---|----------------|--------|
| 1 | 3.504          | 49.81  |
| 2 | 4.480          | 50.19  |

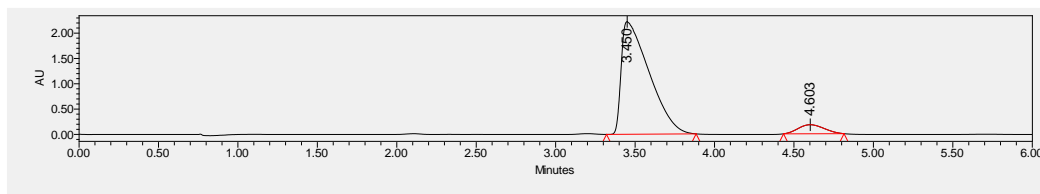

|   | Retention Time | % Area |
|---|----------------|--------|
| 1 | 3.450          | 93.08  |
| 2 | 4.603          | 6.92   |

**Tert-butyl ((3R,4R)-1-benzyl-4-(4-bromobenzyl)-4-(4-methylbenzamido)-2,5-dioxopyrrolidin-3-yl)carbamate C25**

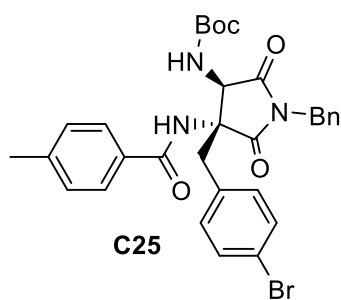

White solid; 39.9 mg, 66% yield, 93:7 er; melting point: 98–101 °C;  $[\alpha]_D^{17} = +23.7$  ( $c = 1.03$  in  $\text{CH}_2\text{Cl}_2$ ).

Dr value determined by  $^1\text{H NMR}$  analysis after flash filtration of reaction mixture with a thin silica gel: 86:14.

**SFC** Daicel chiralcel OX-3,  $\text{CO}_2/\text{MeOH} = 80/20$ , flow rate = 1.5 mL/min,  $\lambda = 254$  nm,  $t_R$  (major) = 4.03 min,  $t_R$  (minor) = 5.49 min.

**$^1\text{H NMR}$**  (400 MHz, Chloroform- $d$ )  $\delta = 7.65$  (d,  $J = 7.8$  Hz, 2H), 7.41 – 7.29 (m, 5H), 7.23 (d,  $J = 8.0$  Hz, 2H), 7.16 (d,  $J = 8.0$  Hz, 2H), 5.32 (s, 2H), 5.13 (s, 1H), 4.76 (d,  $J = 14.2$  Hz, 1H),

4.56 (d,  $J = 14.2$  Hz, 1H), 3.17 (d,  $J = 13.6$  Hz, 1H), 2.94 (d,  $J = 13.6$  Hz, 1H), 2.39 (s, 3H), 1.46 (s, 9H).

**$^{13}\text{C NMR}$**  (101 MHz,  $\text{CDCl}_3$ )  $\delta = 173.4, 172.2, 167.7, 155.8, 142.9, 135.0, 132.2, 131.6, 130.3, 129.5, 129.1, 128.8, 128.2, 127.4, 122.1, 81.0, 64.4, 58.3, 43.2, 37.7, 28.4, 21.7$ .

**IR:** 3326, 2927, 1709, 1653, 1526  $\text{cm}^{-1}$ .

**HRMS** (FTMS+c ESI)  $m/z$ :  $[\text{M} + \text{H}]^+$  calcd for  $\text{C}_{31}\text{H}_{33}\text{N}_3\text{O}_5\text{Br}^+$  606.1598, 607.1632; Found 606.1595, 607.1619.

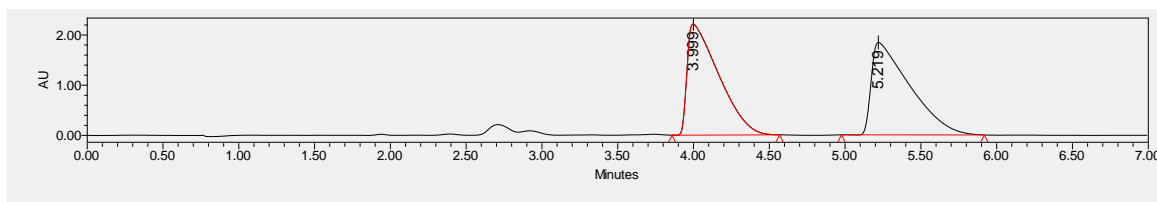

|   | Retention Time | % Area |
|---|----------------|--------|
| 1 | 3.999          | 49.52  |
| 2 | 5.219          | 50.48  |

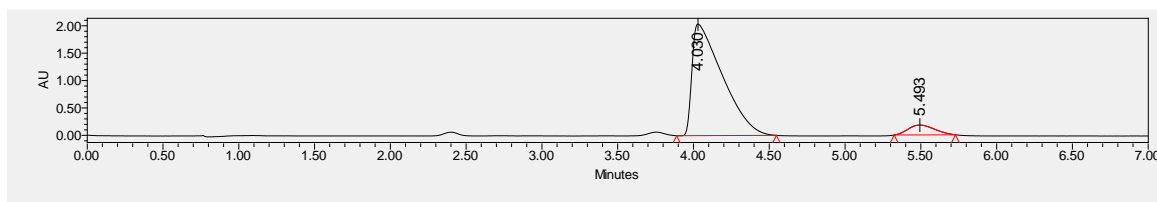

|   | Retention Time | % Area |
|---|----------------|--------|
| 1 | 4.030          | 92.81  |
| 2 | 5.493          | 7.19   |

**Tert-butyl ((3R,4R)-1-benzyl-4-(4-methylbenzamido)-4-(4-methylbenzyl)-2,5-dioxopyrrolidin-3-yl)carbamate C26**

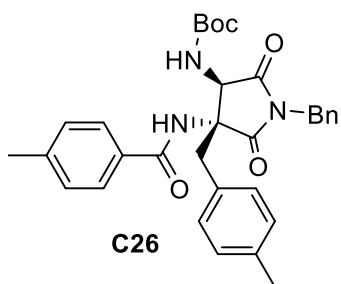

White solid; 43.3 mg, 80% yield, 90:10 er; melting point: 78–84 °C;  $[\alpha]_D^{16} = +41.8$  ( $c = 0.93$  in  $\text{CH}_2\text{Cl}_2$ ).

Dr value determined by  $^1\text{H NMR}$  analysis after flash filtration of reaction mixture with a thin silica gel: 87:13.

**SFC** Daicel chiralcel OX-3,  $\text{CO}_2/\text{MeOH} = 80/20$ , flow rate = 1.5 mL/min,  $\lambda = 254$  nm,  $t_R$  (major) = 3.88 min,  $t_R$  (minor) = 5.37 min.

**$^1\text{H NMR}$**  (400 MHz, Chloroform- $d$ )  $\delta = 7.65$  (d, 2H), 7.46 – 7.16 (m, 7H), 7.04 – 6.81 (m, 4H), 6.57 (s, 1H), 5.27 (s, 2H), 4.76 (d,  $J = 14.4$  Hz, 1H), 4.54 (d,  $J = 14.4$  Hz, 1H), 3.19 (d,  $J =$

13.6 Hz, 1H), 2.93 (d,  $J = 13.6$  Hz, 1H), 2.39 (s, 3H), 2.27 (s, 3H), 1.47 (s, 9H).

**$^{13}\text{C NMR}$**  (101 MHz,  $\text{CDCl}_3$ )  $\delta = 173.7, 172.4, 167.6, 155.7, 142.7, 137.7, 135.1, 130.4, 129.4, 128.9, 128.7, 128.0, 127.5, 80.9, 64.5, 57.8, 43.0, 38.1, 28.4, 21.6, 21.2$ .

**IR:** 3339, 2926, 1713, 1654  $\text{cm}^{-1}$ .

**HRMS** (FTMS+c ESI)  $m/z$ :  $[\text{M} + \text{H}]^+$  calcd for  $\text{C}_{32}\text{H}_{36}\text{N}_3\text{O}_5^+$  542.2649; Found 542.2643.

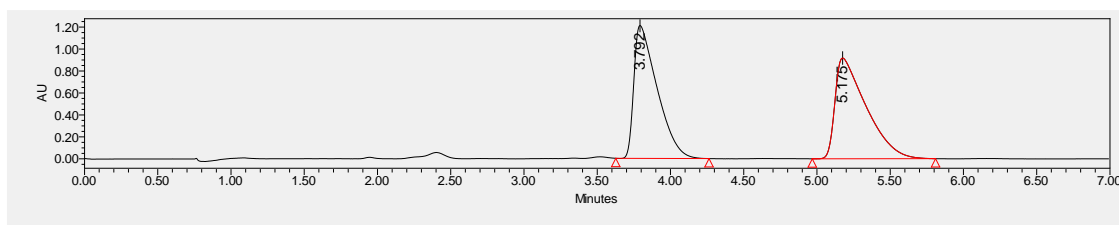

|   | Retention Time | % Area |
|---|----------------|--------|
| 1 | 3.792          | 49.76  |
| 2 | 5.175          | 50.24  |

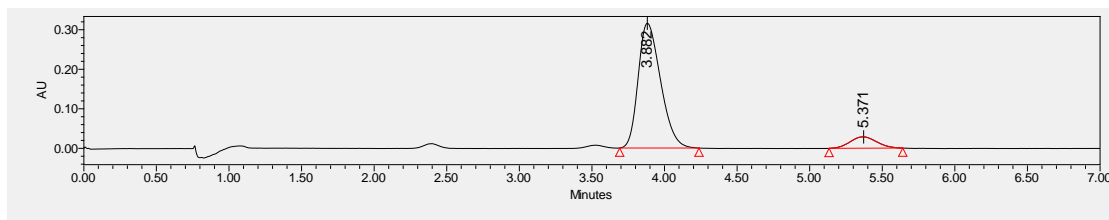

|   | Retention Time | % Area |
|---|----------------|--------|
| 1 | 3.882          | 90.25  |
| 2 | 5.371          | 9.75   |



**Tert-butyl ((3R,4R)-1-benzyl-4-(4-methylbenzamido)-4-(2-methylbenzyl)-2,5-dioxopyrrolidin-3-yl)carbamate C27**

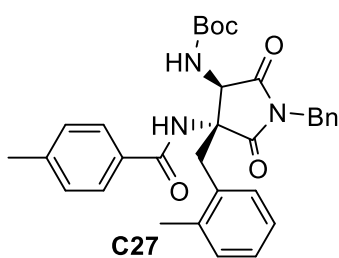

White solid; 46.5 mg, 86% yield, 92:8 er; melting point: 77–82 °C;  $[\alpha]_D^{16} = +67.8$  ( $c = 0.77$  in  $\text{CH}_2\text{Cl}_2$ ).

Dr value determined by  $^1\text{H NMR}$  analysis after flash filtration of reaction mixture with a thin silica gel: 93:17.

**SFC** Daicel chiralcel OX-3,  $\text{CO}_2/\text{MeOH} = 80/20$ , flow rate = 1.5 mL/min,  $\lambda = 254$  nm,  $t_R$  (major) = 5.26 min,  $t_R$  (minor) = 6.89 min.

**$^1\text{H NMR}$**  (400 MHz, Chloroform- $d$ )  $\delta = 7.60 - 7.40$  (m, 4H), 7.39 – 7.27 (m, 3H), 7.23 – 7.10 (m, 4H), 7.03 (s, 1H), 6.94 (d,  $J = 7.6$  Hz, 1H), 6.51 (s, 1H), 5.37 (d, 2H), 4.86 (d,  $J = 14.4$  Hz, 1H), 4.71 (d,  $J = 14.4$  Hz, 1H), 3.29 (d, 1H), 2.93 (d, 1H), 2.37 (s, 3H), 2.15 (s, 3H), 1.45 (s, 9H).

**$^{13}\text{C NMR}$**  (101 MHz,  $\text{CDCl}_3$ )  $\delta = 74.0, 172.3, 167.7, 155.7, 142.8, 137.7, 135.2, 131.2, 131.1, 130.5, 129.4, 129.0, 128.8, 128.12, 127.3, 126.2, 80.8, 63.5, 58.6, 43.2, 33.5, 28.3, 21.6, 19.8$ .

**IR:** 3343, 2927, 1711, 1657, 1523  $\text{cm}^{-1}$ .

**HRMS** (FTMS+c ESI)  $m/z$ :  $[\text{M} + \text{H}]^+$  calcd for  $\text{C}_{32}\text{H}_{36}\text{N}_3\text{O}_5^+$  542.2649; Found 542.2642.

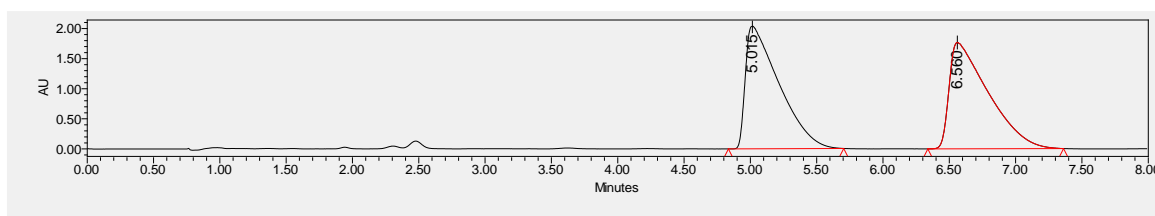

|   | Retention Time | % Area |
|---|----------------|--------|
| 1 | 5.015          | 49.87  |
| 2 | 6.560          | 50.13  |

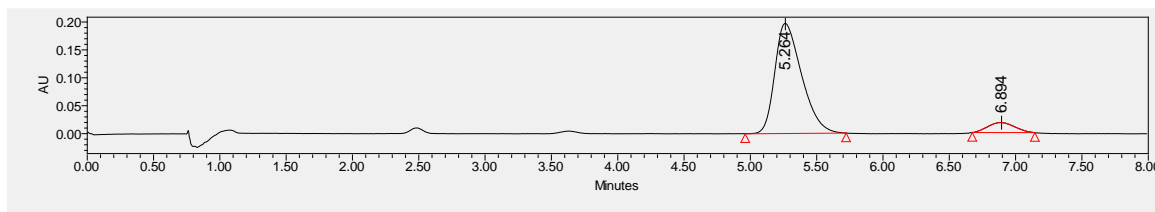

|   | Retention Time | % Area |
|---|----------------|--------|
| 1 | 5.264          | 91.62  |
| 2 | 6.894          | 8.38   |

**Tert-butyl ((3R,4R)-1-benzyl-4-(4-methylbenzamido)-4-(naphthalen-1-ylmethyl)-2,5-dioxopyrrolidin-3-yl)carbamate C28**

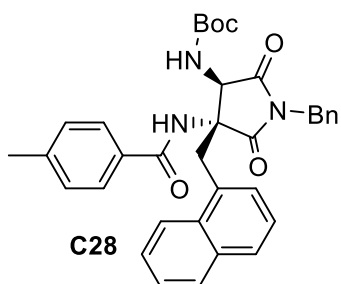

White solid; 42.2 mg, 78% yield, 92:8 er; melting point: 88–92 °C;  $[\alpha]_D^{16} = +63.3$  ( $c = 0.85$  in  $\text{CH}_2\text{Cl}_2$ ).

Dr value determined by  $^1\text{H NMR}$  analysis after flash filtration of reaction mixture with a thin silica gel: 79:21.

**SFC** Daicel chiralcel OX-3,  $\text{CO}_2/\text{MeOH} = 80/20$ , flow rate = 1.5 mL/min,  $\lambda = 254$  nm,  $t_R$  (major) = 8.68 min,  $t_R$  (minor) = 13.83 min.

**$^1\text{H NMR}$**  (400 MHz, Chloroform- $d$ )  $\delta = 8.09 - 7.99$  (m, 1H), 7.98 – 7.87 (m, 1H), 7.80 (d, 1H), 7.61 – 7.44 (m, 4H), 7.44 – 7.28 (m, 4H), 7.20 (s, 2H), 7.07 – 6.92 (m, 3H), 6.68 (s, 1H), 5.46 (d, 2H), 4.88 (d, 1H), 4.73 (d, 1H), 3.89 (d,  $J = 14.8$  Hz, 1H), 3.10 (d,  $J = 14.8$  Hz, 1H), 2.30 (s, 3H), 1.66– 1.22 (m, 9H).

**$^{13}\text{C NMR}$**  (101 MHz,  $\text{CDCl}_3$ )  $\delta = 173.3, 172.4, 167.4, 155.8, 142.6, 135.5, 134.1, 132.9, 130.2, 129.7, 129.2, 129.0, 128.9, 128.2, 127.2, 127.1, 125.9, 125.5, 122.8, 80.9, 64.1, 58.5, 43.1, 32.9, 28.3, 21.5$ .

**IR:** 3432, 1715, 1655, 1523, 1492 $\text{cm}^{-1}$ .

**HRMS** (FTMS+c ESI)  $m/z$ :  $[\text{M} + \text{H}]^+$  calcd for  $\text{C}_{35}\text{H}_{36}\text{N}_3\text{O}_5^+$  578.2650; Found 578.2645.

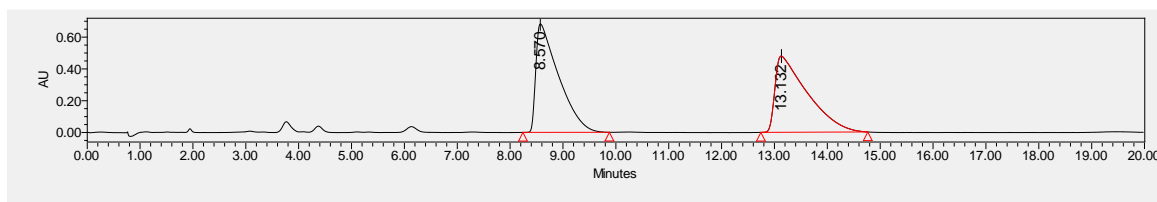

|   | Retention Time | % Area |
|---|----------------|--------|
| 1 | 8.570          | 50.26  |
| 2 | 13.132         | 49.74  |

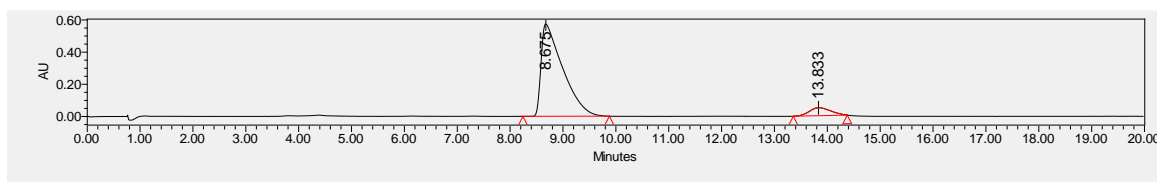

|   | Retention Time | % Area |
|---|----------------|--------|
| 1 | 8.675          | 92.09  |
| 2 | 13.833         | 7.91   |

**Tert-butyl ((3R,4R)-4-((1H-indol-3-yl)methyl)-1-benzyl-4-(4-methylbenzamido)-2,5-dioxopyrrolidin-3-yl)carbamate C29**

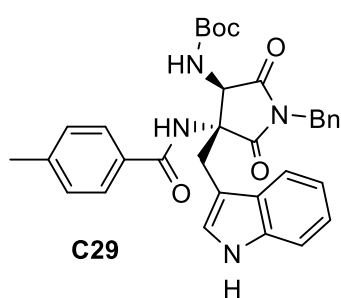

White solid; 17.0 mg, 30% yield, 90.5:8.5 er;  $[\alpha]_D^{17} = +23.5$  ( $c = 0.26$  in  $\text{CH}_2\text{Cl}_2$ ).

Dr value determined by  $^1\text{H NMR}$  analysis after flash filtration, the reaction mixture was too complex to analyze.

**SFC** Daicel chiralcel OX-3,  $\text{CO}_2/\text{MeOH} = 85/15$ , flow rate = 1.5 mL/min,  $\lambda = 254$  nm,  $t_R$  (major) = 15.72 min,  $t_R$  (minor) = 18.22 min.

**$^1\text{H NMR}$**  (400 MHz,  $\text{Chloroform-}d$ )  $\delta = 7.81$  (s, 1H), 7.58 (t,  $J = 7.4$  Hz, 3H), 7.47 – 7.26 (m, 6H), 7.24 – 7.02 (m, 4H), 6.68 (s, 1H), 6.51 (s, 1H), 5.39 (s, 1H), 5.10 (d, 1H), 4.76 (d,  $J = 14.4$  Hz, 1H), 4.55 (d,  $J = 14.4$  Hz, 1H), 3.40 (d,  $J = 14.4$  Hz, 1H), 3.13 (d,  $J = 14.4$  Hz, 1H),

2.36 (s, 3H), 1.48 (s, 9H).

**$^{13}\text{C NMR}$**  (101 MHz,  $\text{CDCl}_3$ )  $\delta = 174.6, 172.8, 142.7, 135.8, 135.5, 129.3, 128.8, 128.0, 127.5, 127.3, 125.3, 122.7, 120.3, 118.3, 111.8, 105.5, 80.7, 64.4, 57.3, 43.1, 28.4, 21.6$ .

**IR:** 3408, 2924, 1710, 1648  $\text{cm}^{-1}$ .

**HRMS** (FTMS+c ESI)  $m/z$ :  $[\text{M} + \text{H}]^+$  calcd for  $\text{C}_{33}\text{H}_{35}\text{N}_4\text{O}_5^+$  567.2602; Found 567.2598.

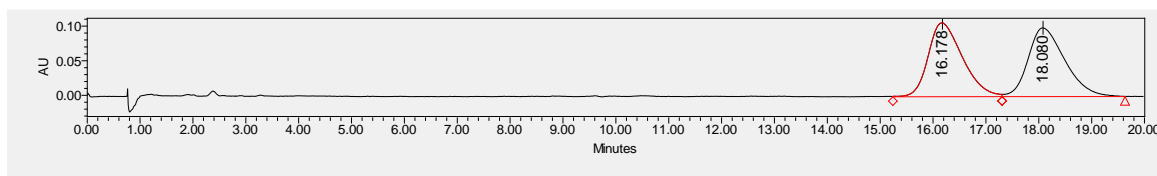

|   | Retention Time | % Area |
|---|----------------|--------|
| 1 | 16.178         | 50.03  |
| 2 | 18.080         | 49.97  |

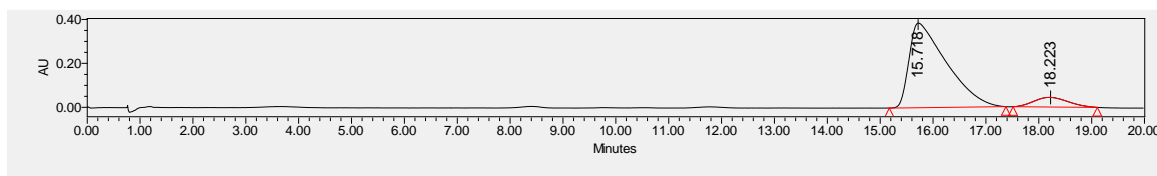

|   | Retention Time | % Area |
|---|----------------|--------|
| 1 | 15.718         | 90.51  |
| 2 | 18.223         | 9.49   |

**Tert-butyl ((3R,4R)-1-benzyl-4-cyclohexyl-4-(4-methylbenzamido)-2,5-dioxopyrrolidin-3-yl)carbamate C30**

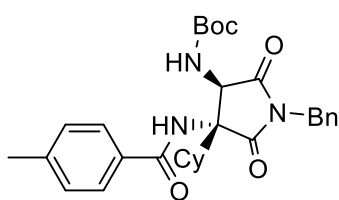

**C30**

White solid; 7.8 mg, 15% yield, 84:16 er;  $[\alpha]_D^{16} = +18.7$  ( $c = 0.18$  in  $\text{CH}_2\text{Cl}_2$ ).

Dr value determined by  $^1\text{H NMR}$  analysis after flash filtration, the reaction mixture was too complex to analyze.

**SFC** Daicel chiralcel OX-3,  $\text{CO}_2/\text{MeOH} = 80/20$ , flow rate = 1.5 mL/min,  $\lambda = 254$  nm,  $t_R$  (major) = 2.83 min,  $t_R$  (minor) = 3.65 min.

**$^1\text{H NMR}$**  (400 MHz,  $\text{Chloroform-}d$ )  $\delta = 7.71$  (d,  $J = 7.8$  Hz, 2H), 7.57 – 7.44 (m, 2H), 7.37 – 7.17 (m, 7H), 6.47 (s, 1H), 5.17 (s, 2H), 4.86 (d,  $J = 14.0$  Hz, 1H), 4.73 (d,  $J = 14.0$  Hz, 1H),

2.40 (s, 3H), 1.80 (d, 3H), 1.33 (d, 12H), 1.20 – 0.75 (m, 6H), 0.35 (m, 1H).

**$^{13}\text{C NMR}$**  (101 MHz,  $\text{CDCl}_3$ )  $\delta = 172.6, 157.9, 135.2, 129.4, 129.3, 128.7, 128.1, 127.5, 65.7, 58.0, 43.1, 41.2, 29.8, 28.3, 26.3, 26.1, 25.9, 21.7$ .

**IR:** 3649, 1716, 1653, 1521  $\text{cm}^{-1}$ .

**HRMS** (FTMS+c ESI)  $m/z$ :  $[\text{M} + \text{H}]^+$  calcd for  $\text{C}_{30}\text{H}_{38}\text{N}_3\text{O}_5^+$  520.2806; Found 520.2813.

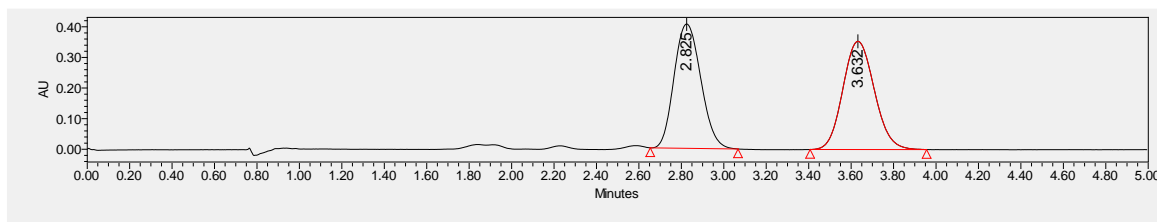

|   | Retention Time | % Area |
|---|----------------|--------|
| 1 | 2.825          | 49.47  |
| 2 | 3.632          | 50.53  |

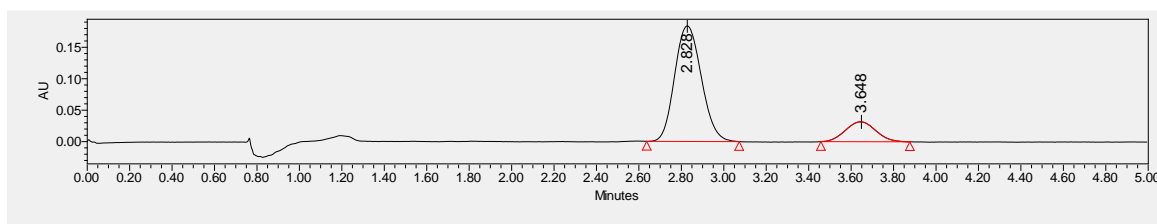

|   | Retention Time | % Area |
|---|----------------|--------|
| 1 | 2.828          | 83.59  |
| 2 | 3.648          | 16.41  |

### ***N*-((3*R*,4*R*)-4-Amino-1,3-dibenzyl-2,5-dioxopyrrolidin-3-yl)benzamide D1**

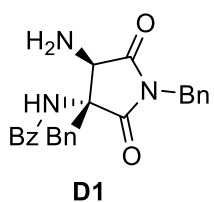

**D1**

White solid; 116.4 mg, 94% yield, >99:1 er, >19:1 dr; melting point: 62–68 °C;  $[\alpha]_D^{24} = +118.3$  ( $c = 0.51$  in  $\text{CH}_2\text{Cl}_2$ ).

**SFC** Daicel chiralcel OX-3,  $\text{CO}_2/\text{MeOH} = 80/20$ , flow rate = 1.5 mL/min,  $\lambda = 254$  nm,  $t_R$  (major) = 8.35 min,  $t_R$  (minor) = 13.22 min.

**$^1\text{H NMR}$**  (400 MHz, Chloroform-*d*)  $\delta = 7.76 - 7.63$  (m, 2H), 7.58 – 7.48 (m, 1H), 7.48 – 7.29 (m, 7H), 7.24 – 7.09 (m, 3H), 6.92 – 6.78 (m, 2H), 6.69 (s, 1H), 4.71 (d,  $J = 14.2$  Hz, 1H), 4.59 – 4.46 (m, 2H), 3.46 (d,  $J = 13.8$  Hz, 1H), 2.92 (d,  $J = 13.8$  Hz, 1H), 2.18 (s, 2H).

**$^{13}\text{C NMR}$**  (101 MHz,  $\text{CDCl}_3$ )  $\delta = 175.4, 175.1, 167.6, 135.2, 133.8, 133.4, 132.4, 130.6, 129.1, 128.9, 128.9, 128.4, 128.3, 127.7, 127.1, 65.8, 60.2, 42.8, 38.0$ .

**IR:** 3385, 1709, 1655, 1523  $\text{cm}^{-1}$ .

**HRMS** (FTMS+c ESI)  $m/z$ :  $[\text{M} + \text{H}]^+$  calcd for  $\text{C}_{25}\text{H}_{24}\text{N}_3\text{O}_3^+$  414.1812; Found 414.1812.

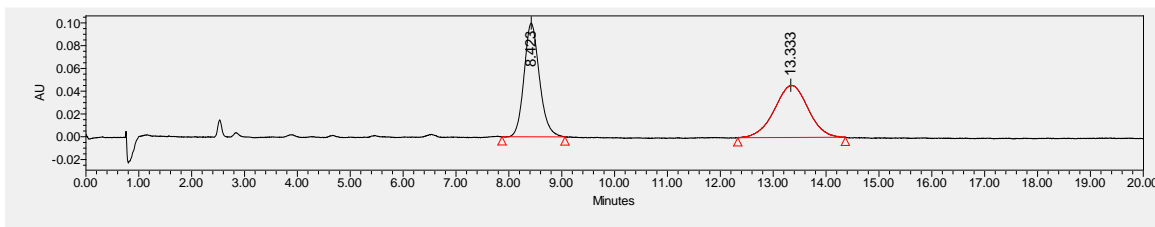

|   | Retention Time | % Area |
|---|----------------|--------|
| 1 | 8.423          | 49.94  |
| 2 | 13.333         | 50.06  |

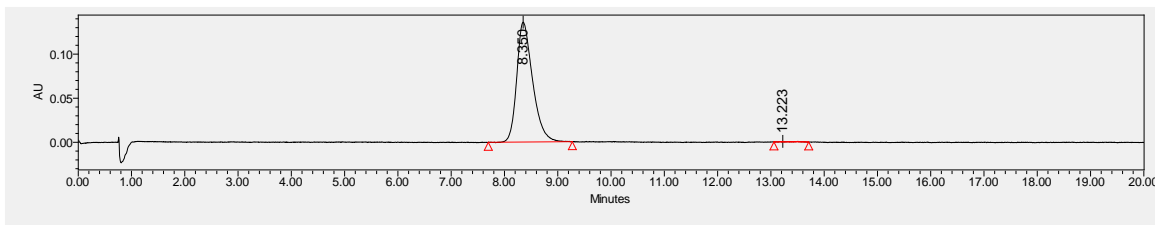

|   | Retention Time | % Area |
|---|----------------|--------|
| 1 | 8.350          | 99.70  |
| 2 | 13.223         | 0.30   |

## *N*-((3*S*,4*S*)-4-Amino-1,3-dibenzylpyrrolidin-3-yl)benzamide **D2**

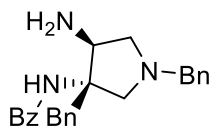

**D2**

White solid; 41.2 mg, 55% yield, >99:1 er, >19:1 dr; melting point: 52–55 °C;  $[\alpha]_D^{21} = +57.9$  ( $c = 0.82$  in  $\text{CH}_2\text{Cl}_2$ ).

**SFC** Daicel chiralcel OD-3,  $\text{CO}_2/\text{MeOH} = 90/10$ , flow rate = 1.5 mL/min,  $\lambda = 254$  nm,  $t_R$  (major) = 12.62 min,  $t_R$  (minor) = 26.85 min.

**$^1\text{H NMR}$**  (400 MHz, Chloroform-*d*)  $\delta = 7.68 - 7.59$  (m, 2H), 7.53 – 7.45 (m, 1H), 7.40 (dd, 2H), 7.36 – 7.22 (m, 5H), 7.17 (dd, 3H), 7.08 (dd, 2H), 6.11 (s, 1H), 3.88 (td, 1H), 3.73 (d, 1H), 3.60 (s, 2H), 3.31 (dd, 1H), 2.77 – 2.62 (m, 2H), 2.45 (d, 1H), 2.25 (dd, 1H), 2.08 (s, 2H).

**$^{13}\text{C NMR}$**  (101 MHz,  $\text{CDCl}_3$ )  $\delta = 168.1, 138.1, 138.0, 135.1, 131.4, 130.2, 128.7, 128.6, 128.3, 128.1, 127.2, 126.8, 126.3, 65.3, 64.5, 61.9, 60.7, 59.9, 35.8$ .

**IR:** 3296, 2799, 1647, 1536, 1494  $\text{cm}^{-1}$ .

**HRMS** (FTMS+c ESI)  $m/z$ :  $[\text{M} + \text{H}]^+$  calcd for  $\text{C}_{25}\text{H}_{28}\text{N}_3\text{O}^+$  386.2227; Found 386.2228.

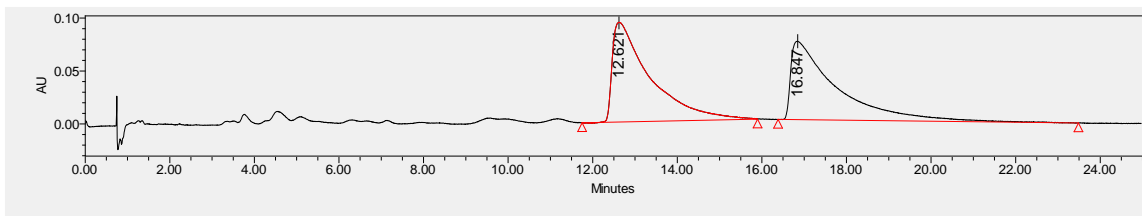

|   | Retention Time | % Area |
|---|----------------|--------|
| 1 | 12.621         | 51.45  |
| 2 | 16.847         | 48.55  |

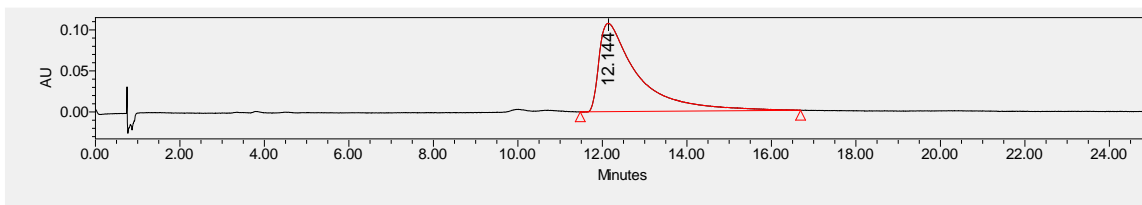

|   | Retention Time | % Area |
|---|----------------|--------|
| 1 | 12.144         | 100.00 |

**Tert-butyl R-(4-benzamido-1,4-dibenzyl-5-oxopyrrolidin-3-ylidene)carbamate D3**

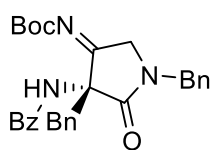

**D3**

White solid; 134.6, 90% yield, >99:1 er; melting point: 190–201 °C;  $[\alpha]_D^{21} = +35.8$  ( $c = 1.71$  in  $\text{CH}_2\text{Cl}_2$ ).

**SFC** Daicel chiralcel OX-3,  $\text{CO}_2/\text{MeOH} = 80/20$ , flow rate = 1.5 mL/min,  $\lambda = 254$  nm,  $t_R$  (major) = 2.00 min,  $t_R$  (minor) = 2.56 min.

**$^1\text{H NMR}$**  (400 MHz,  $\text{Chloroform-}d$ )  $\delta = 7.77 - 7.70$  (m, 2H), 7.60 – 7.50 (m, 1H), 7.44 (dd, 2H), 7.28 – 7.16 (m, 6H), 7.11 (dd, 2H), 7.05 (dd, 2H), 6.50 (s, 1H), 5.08 (d,  $J = 7.6$  Hz, 1H), 4.82 (d,  $J = 7.6$  Hz, 1H), 4.74 – 4.61 (m, 2H), 3.54 (d,  $J = 12.4$  Hz, 1H), 3.36 (d,  $J = 12.4$  Hz, 1H), 1.32 (s, 9H).

**$^{13}\text{C NMR}$**  (101 MHz,  $\text{CDCl}_3$ )  $\delta = 175.3, 173.6, 168.7, 156.4, 134.9, 132.4, 132.3, 131.8, 131.0, 128.8, 128.7, 128.4, 128.2, 127.8, 127.5, 127.1, 80.3, 62.4, 53.8, 42.5, 41.3, 28.0$ .

**IR:** 3359, 1709, 1655, 1580, 1489  $\text{cm}^{-1}$ .

**HRMS** (FTMS+c ESI)  $m/z$ :  $[\text{M} + \text{H}]^+$  calcd for  $\text{C}_{30}\text{H}_{38}\text{N}_3\text{O}_5^+$  498.2387; Found 498.2390.

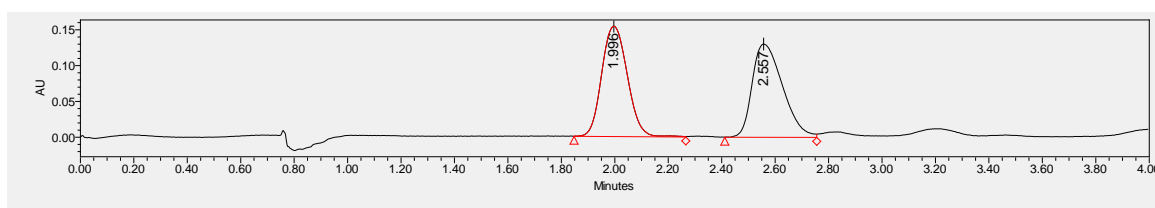

|   | Retention Time | % Area |
|---|----------------|--------|
| 1 | 1.996          | 49.92  |
| 2 | 2.557          | 50.08  |

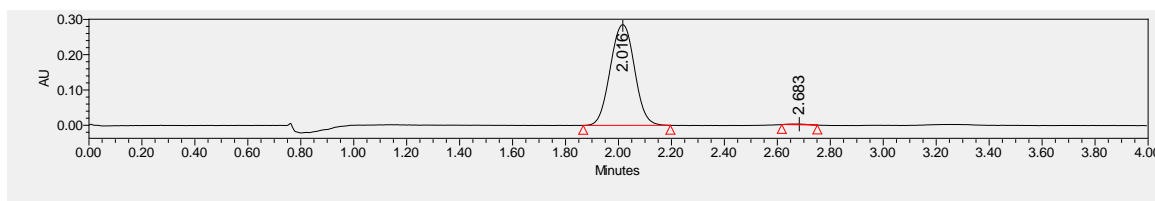

|   | Retention Time | % Area |
|---|----------------|--------|
| 1 | 2.016          | 99.54  |
| 2 | 2.683          | 0.46   |

## 14. Copies of NMR spectra for substrates

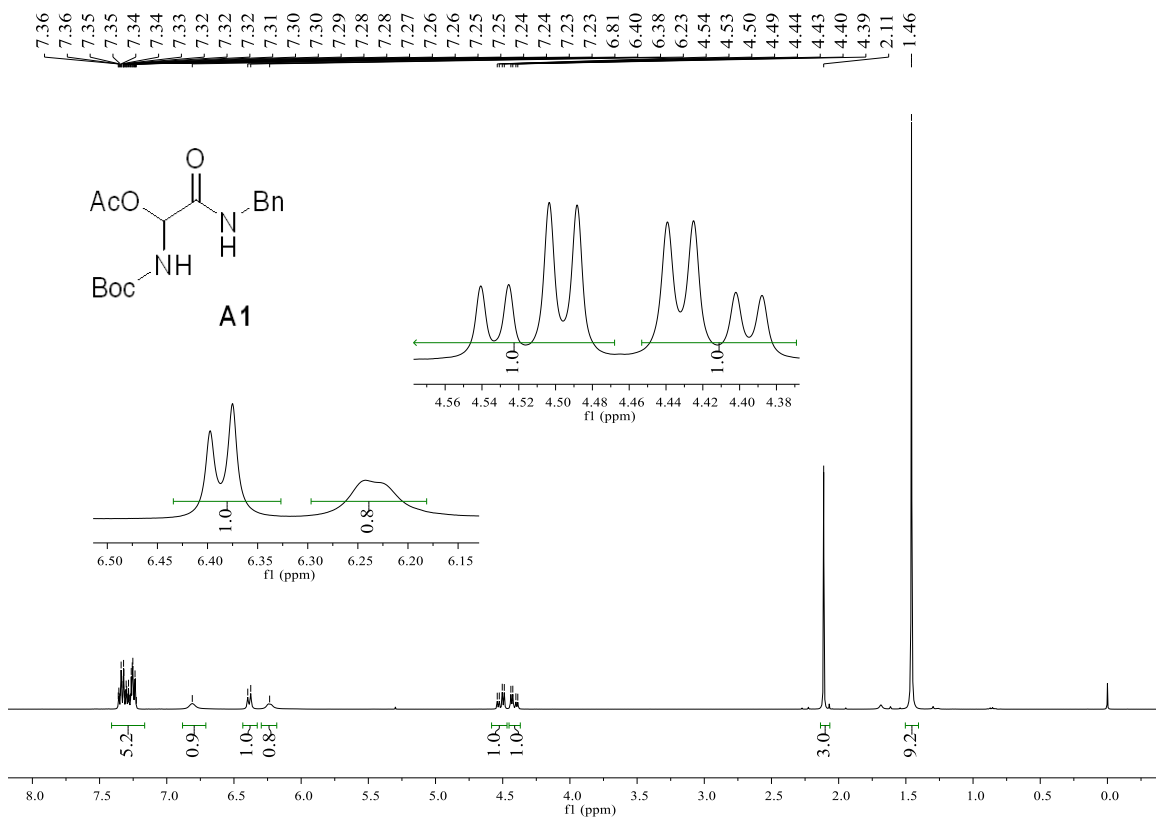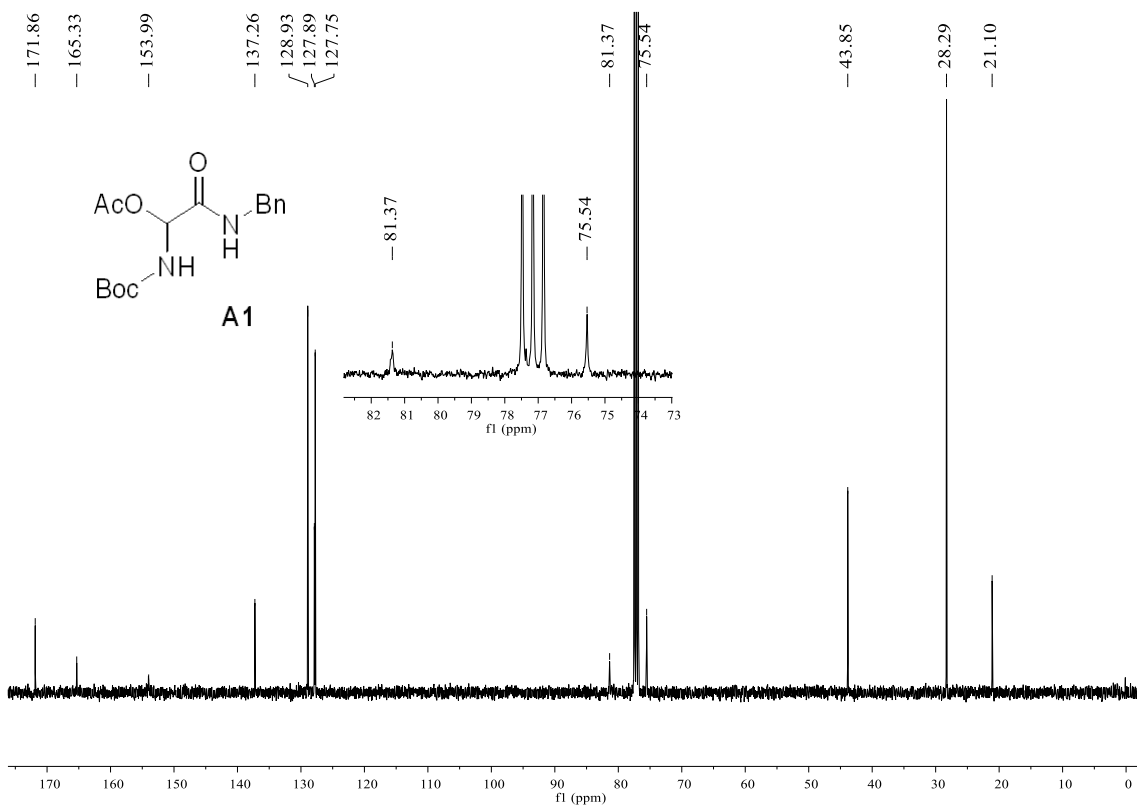



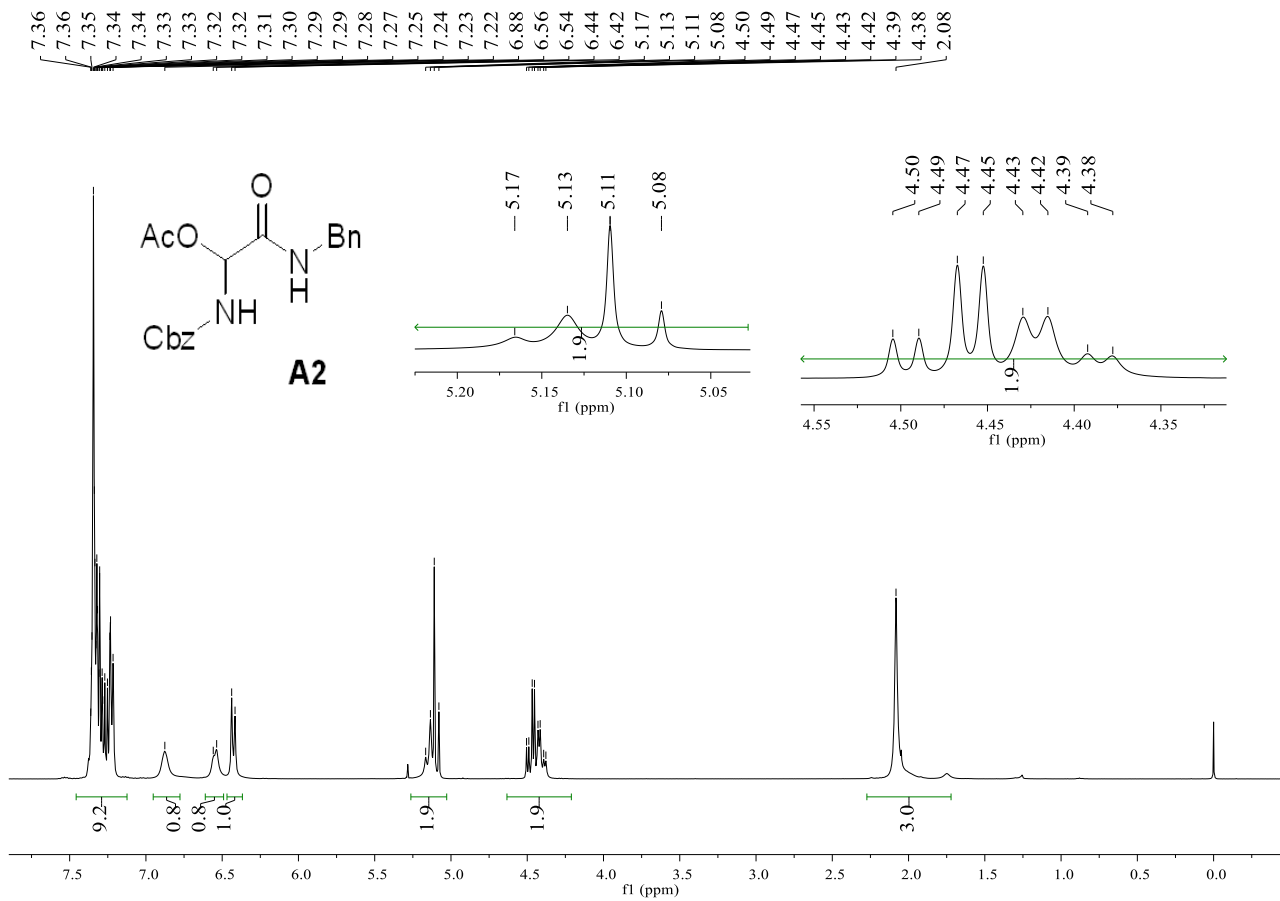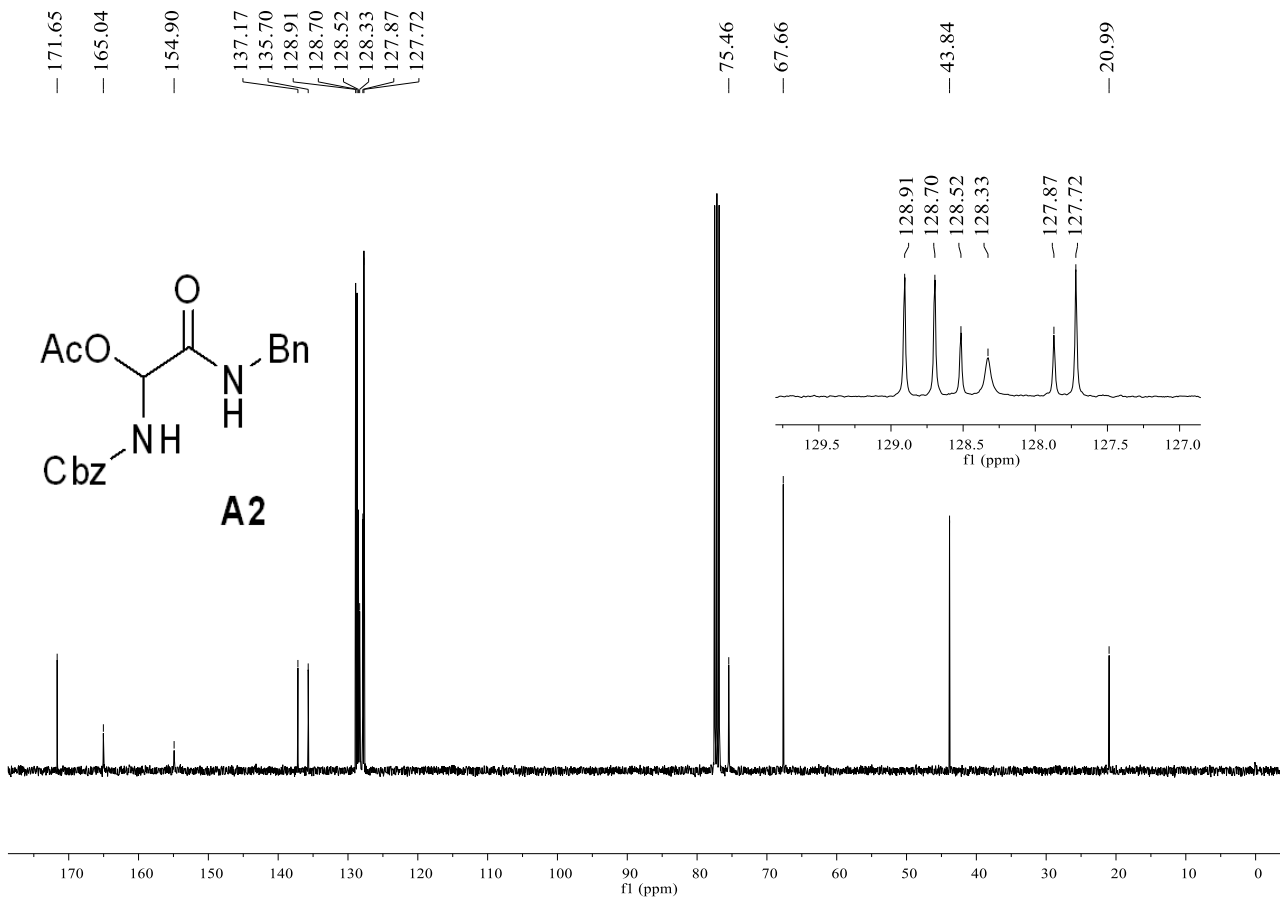

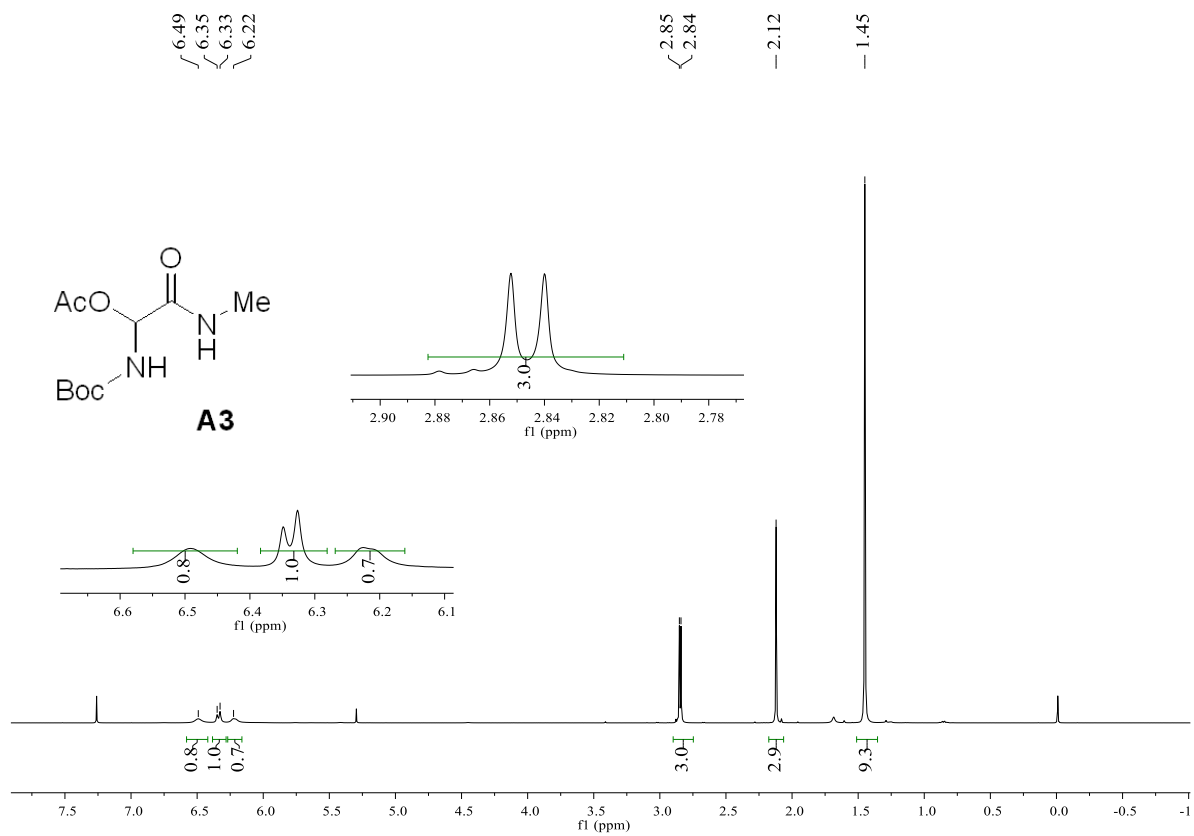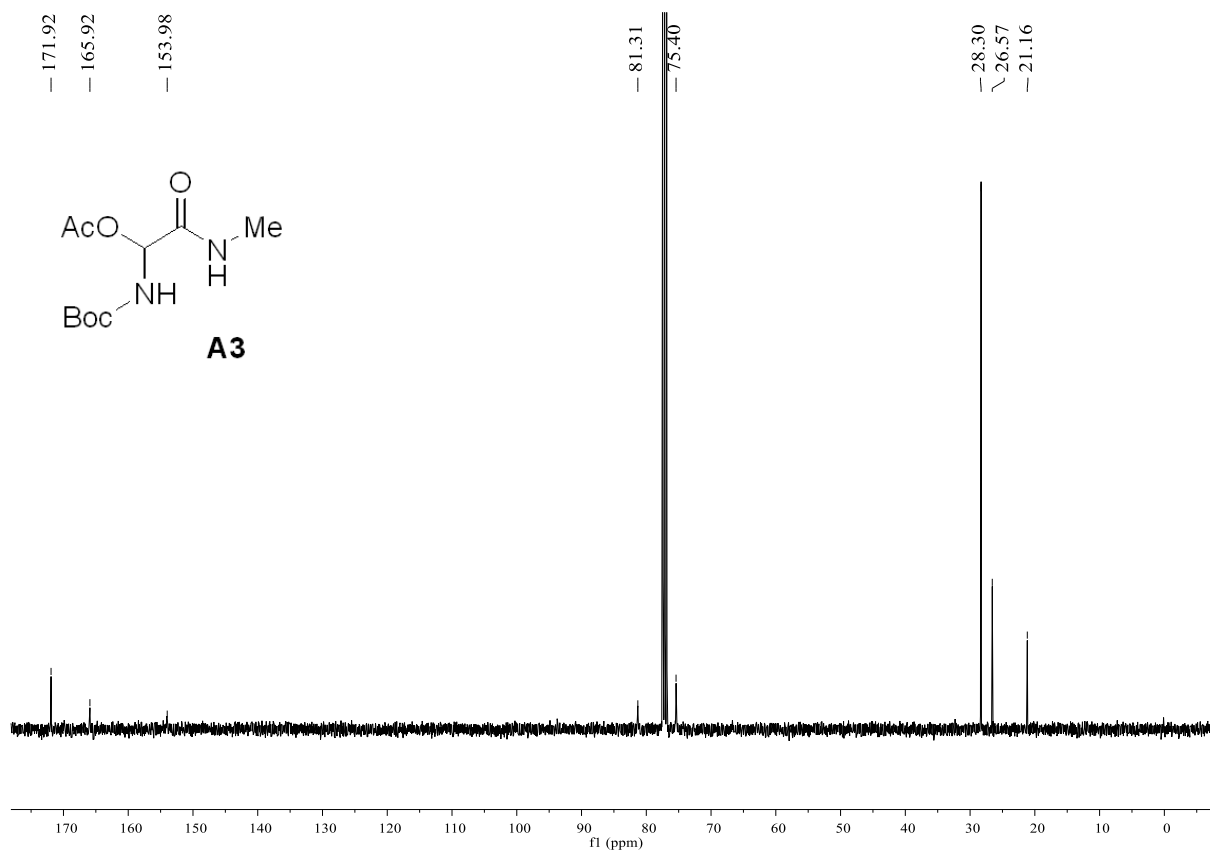

## 15. Copies of NMR spectra for products

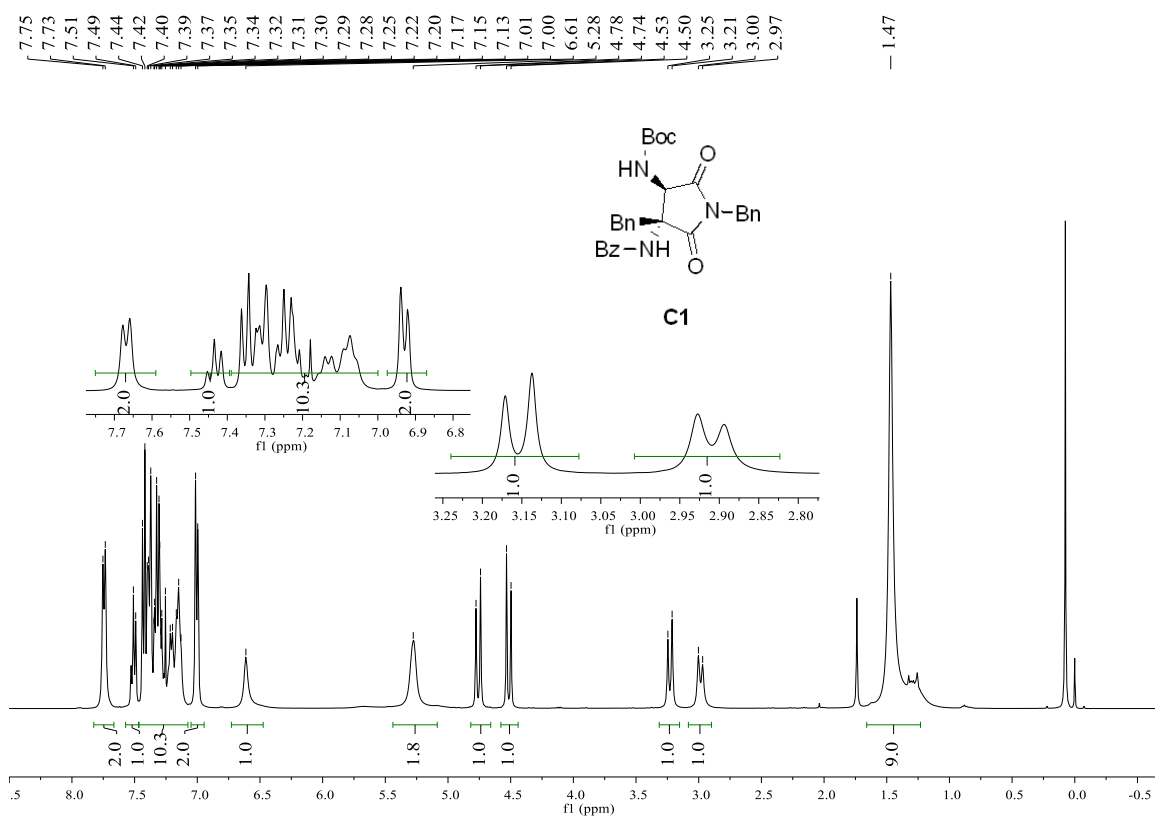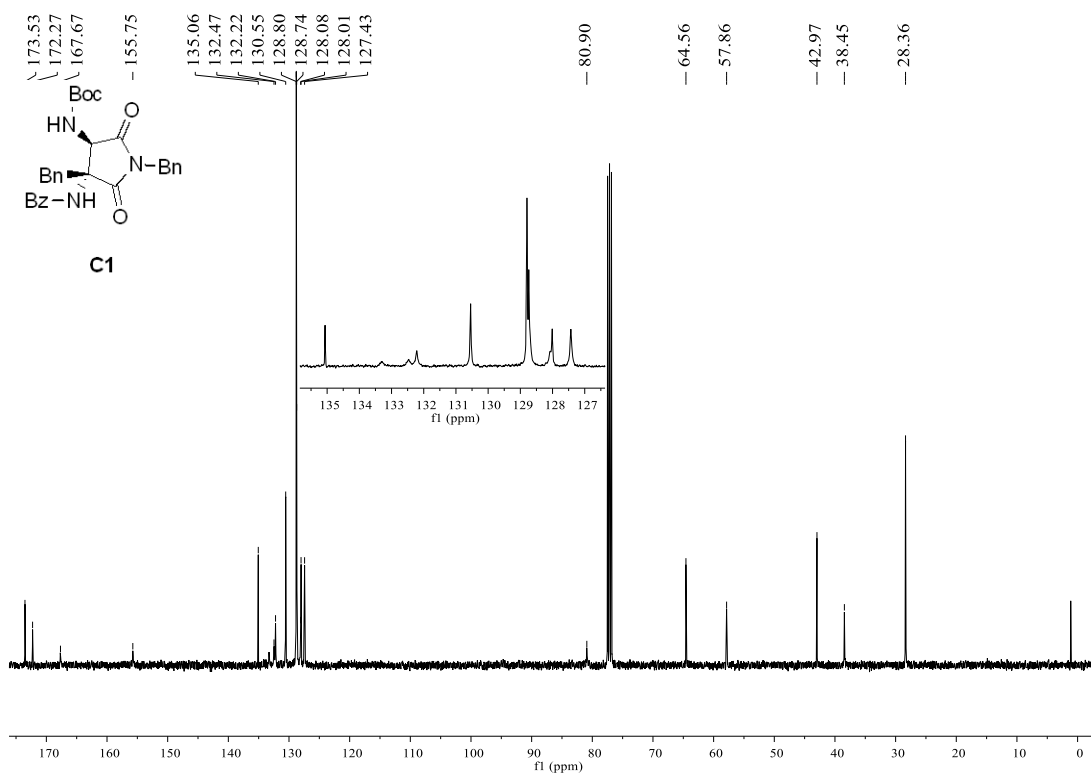

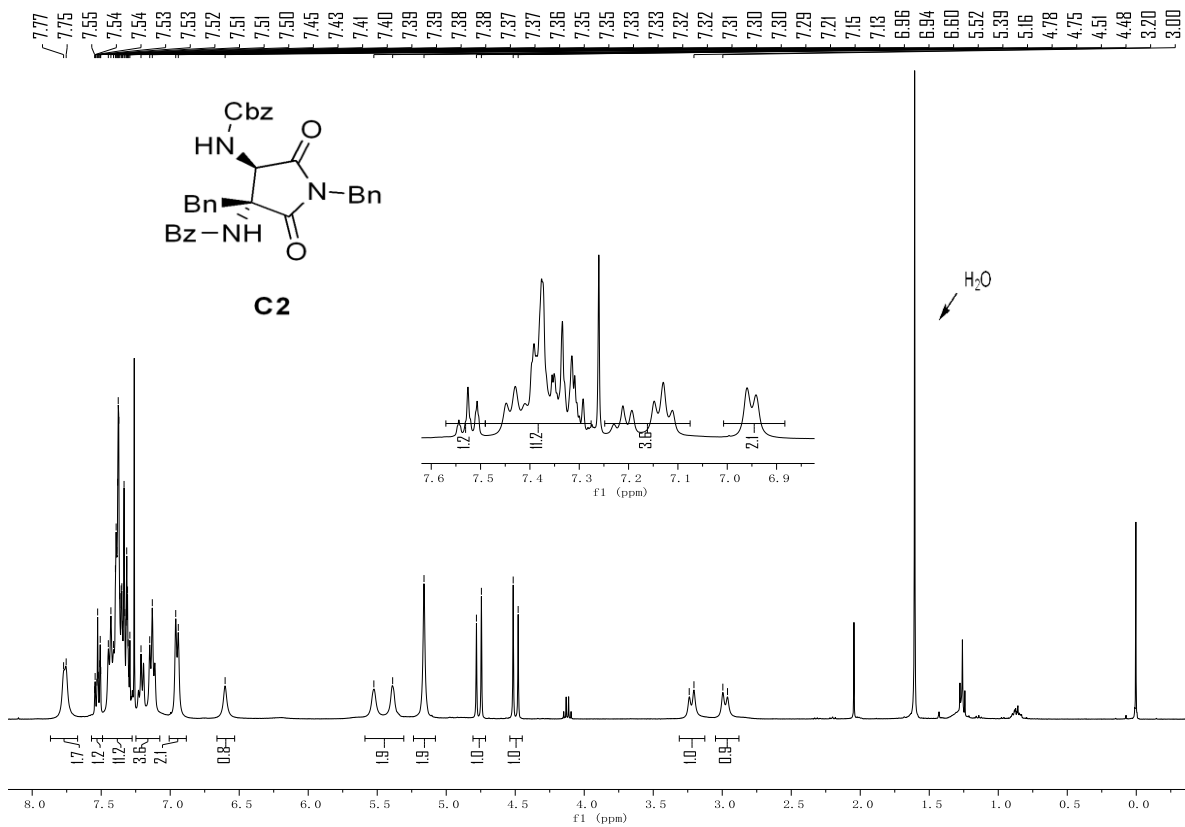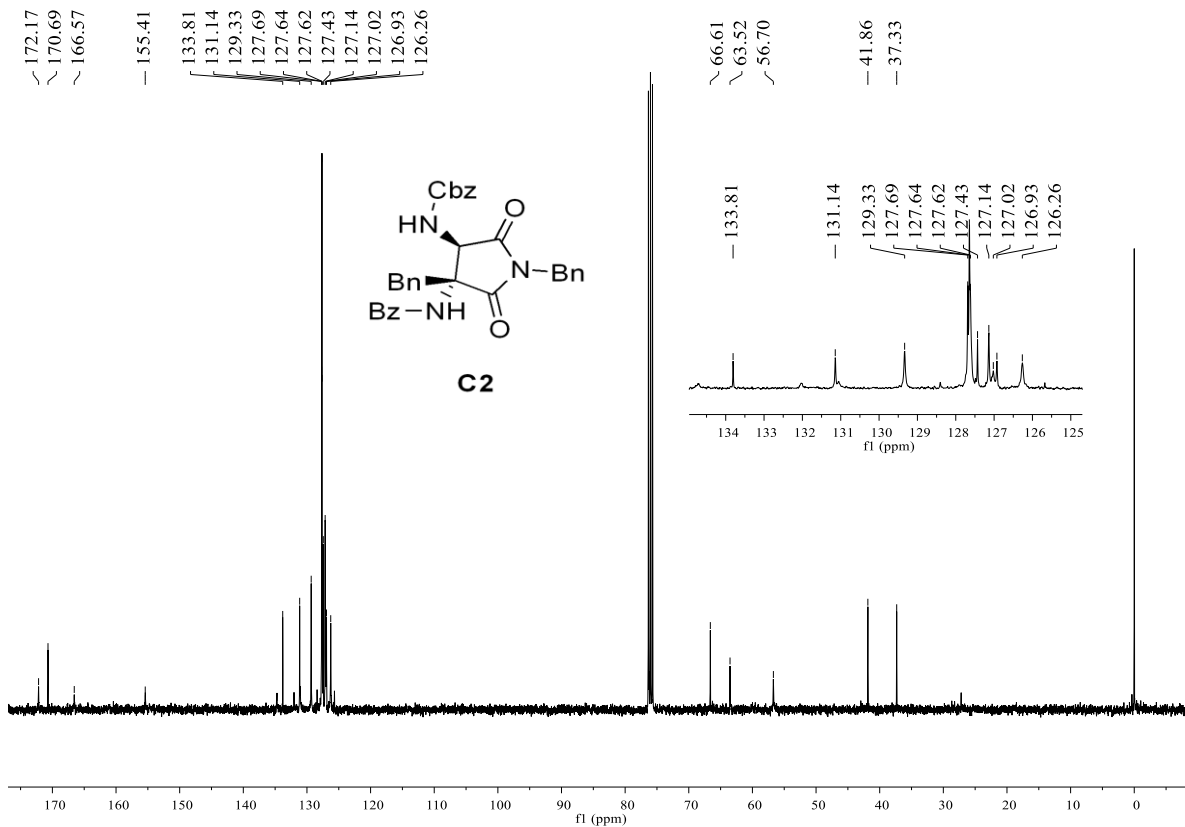

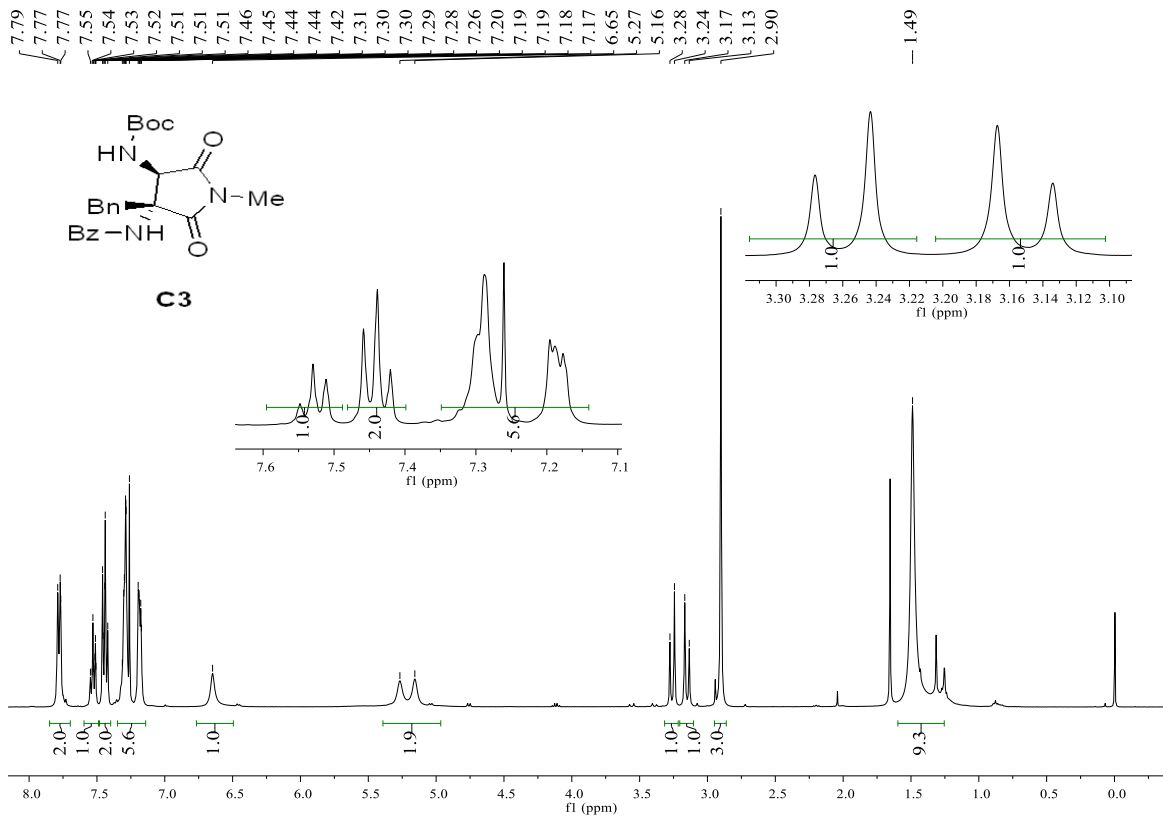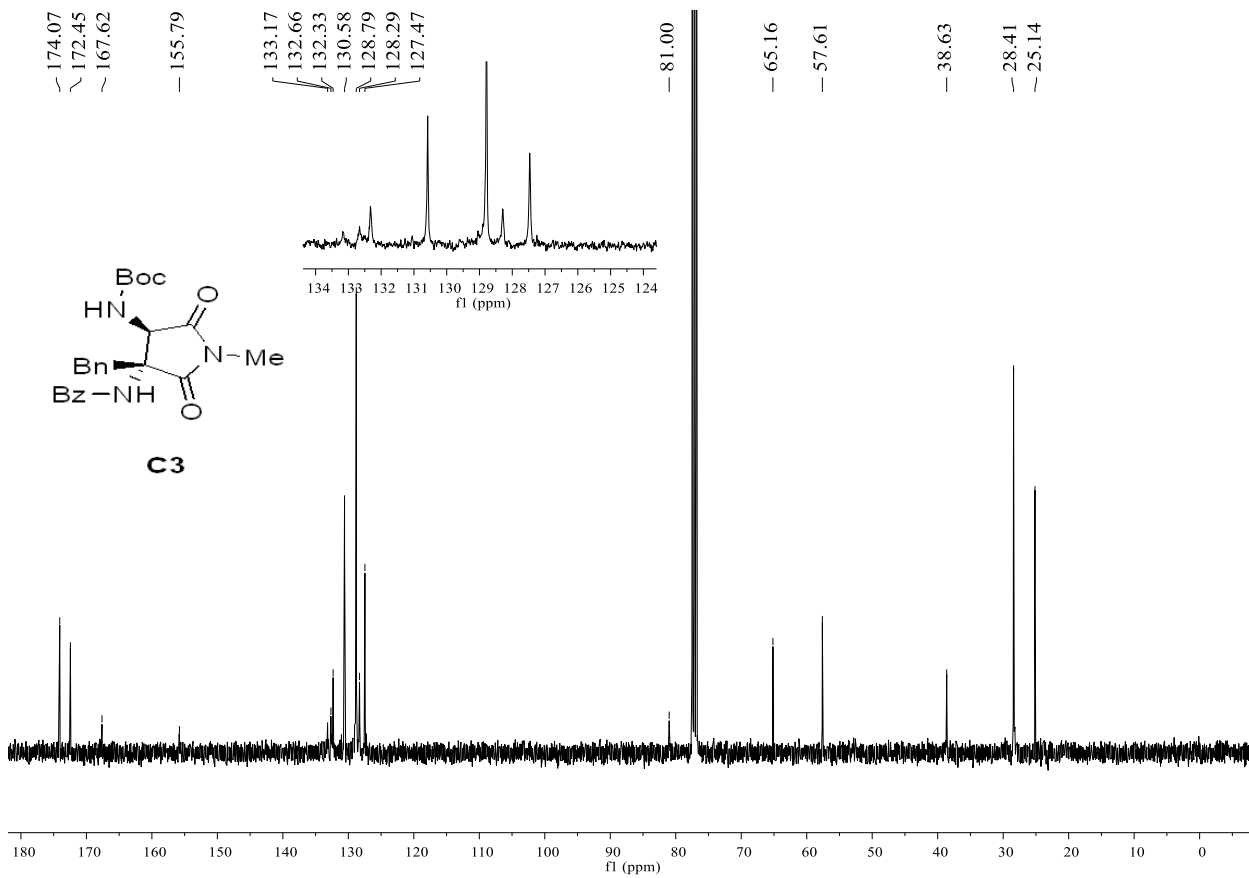

7.77, 7.76, 7.75, 7.74, 7.39, 7.38, 7.37, 7.36, 7.35, 7.34, 7.33, 7.31, 7.30, 7.29, 7.28, 7.22, 7.20, 7.17, 7.16, 7.14, 7.12, 7.12, 7.10, 7.08, 7.08, 7.01, 7.01, 7.00, 7.00, 6.99, 6.53, 5.26, 4.77, 4.73, 4.52, 4.48, 3.23, 3.20, 3.00, 2.96, 1.47

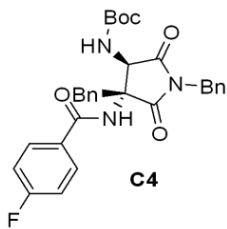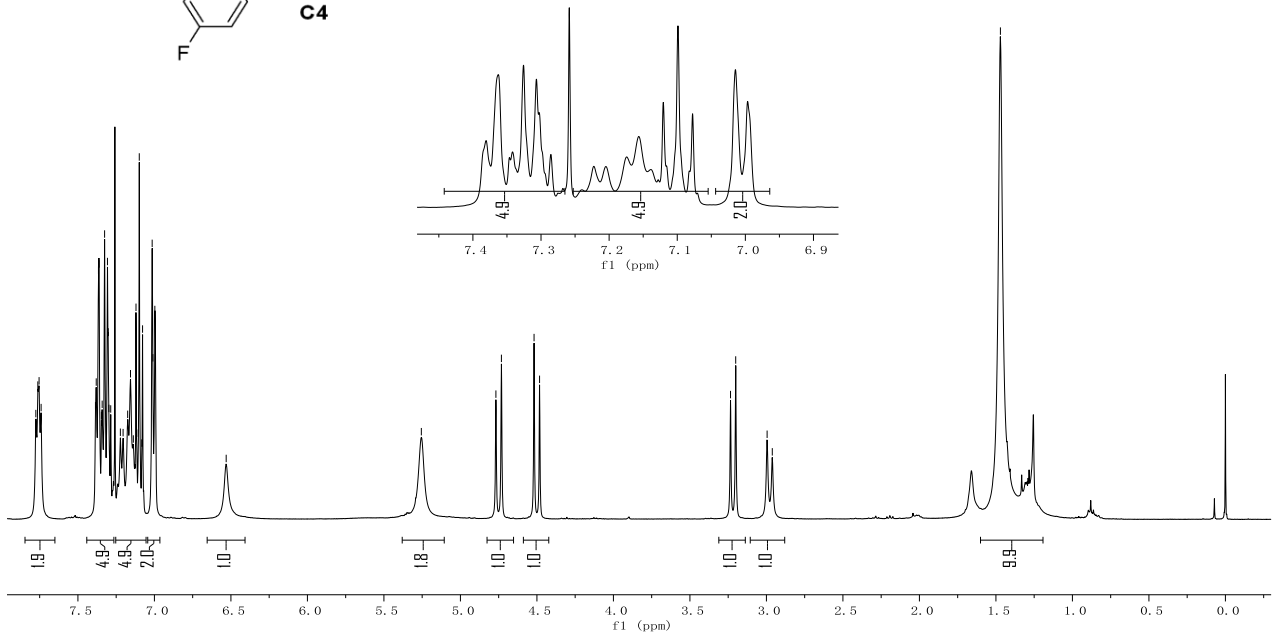

173.47, 172.21, 166.48, 163.97

135.01, 132.38, 130.54, 129.94, 129.85, 128.81, 128.77, 128.15, 128.05, 115.96, 115.74

132.38, 130.54, 129.94, 129.85, 128.81, 128.77, 128.15, 128.05

81.00

64.66, 57.80

42.97, 38.50

28.38

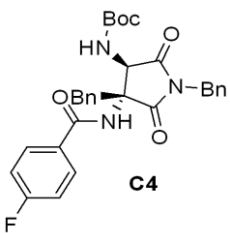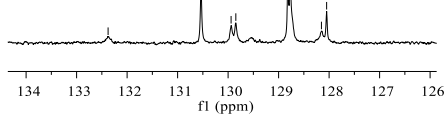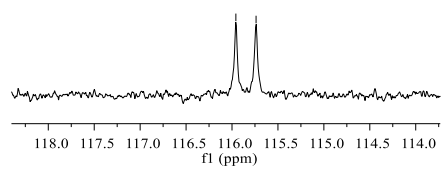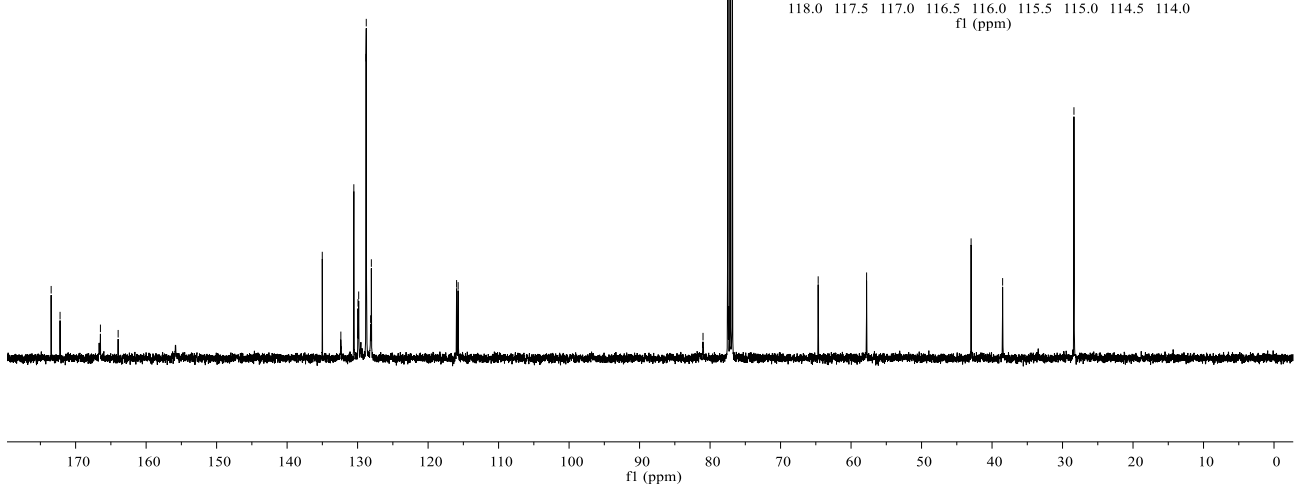

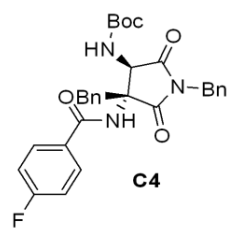

-107.07

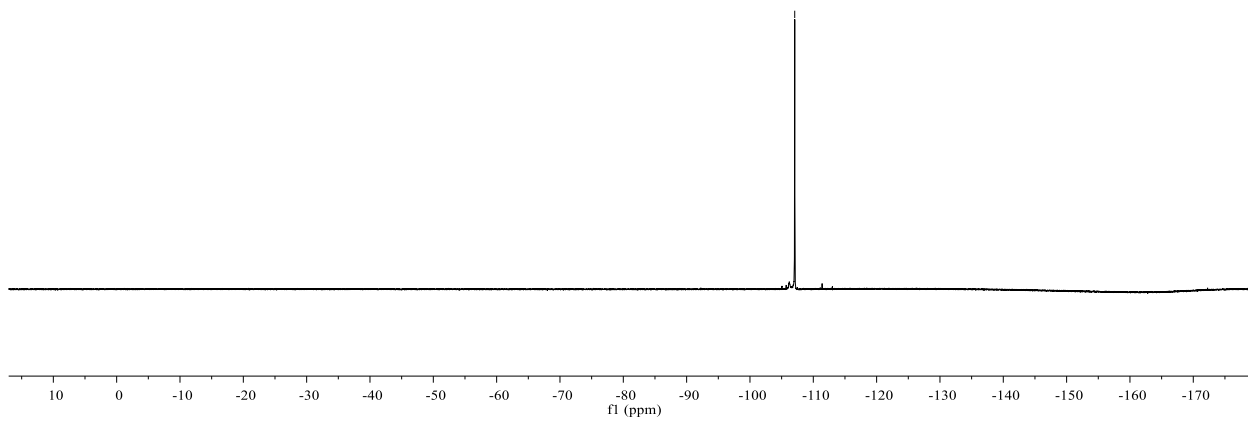

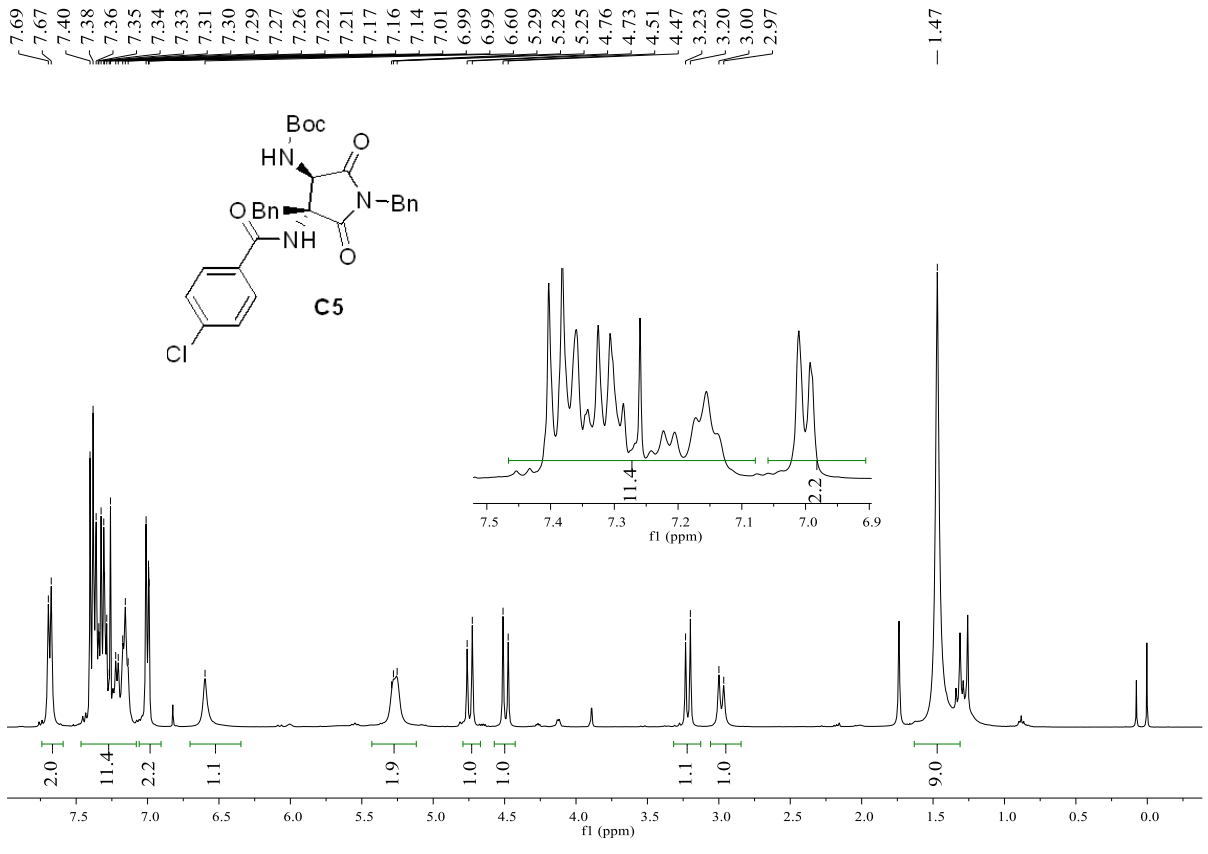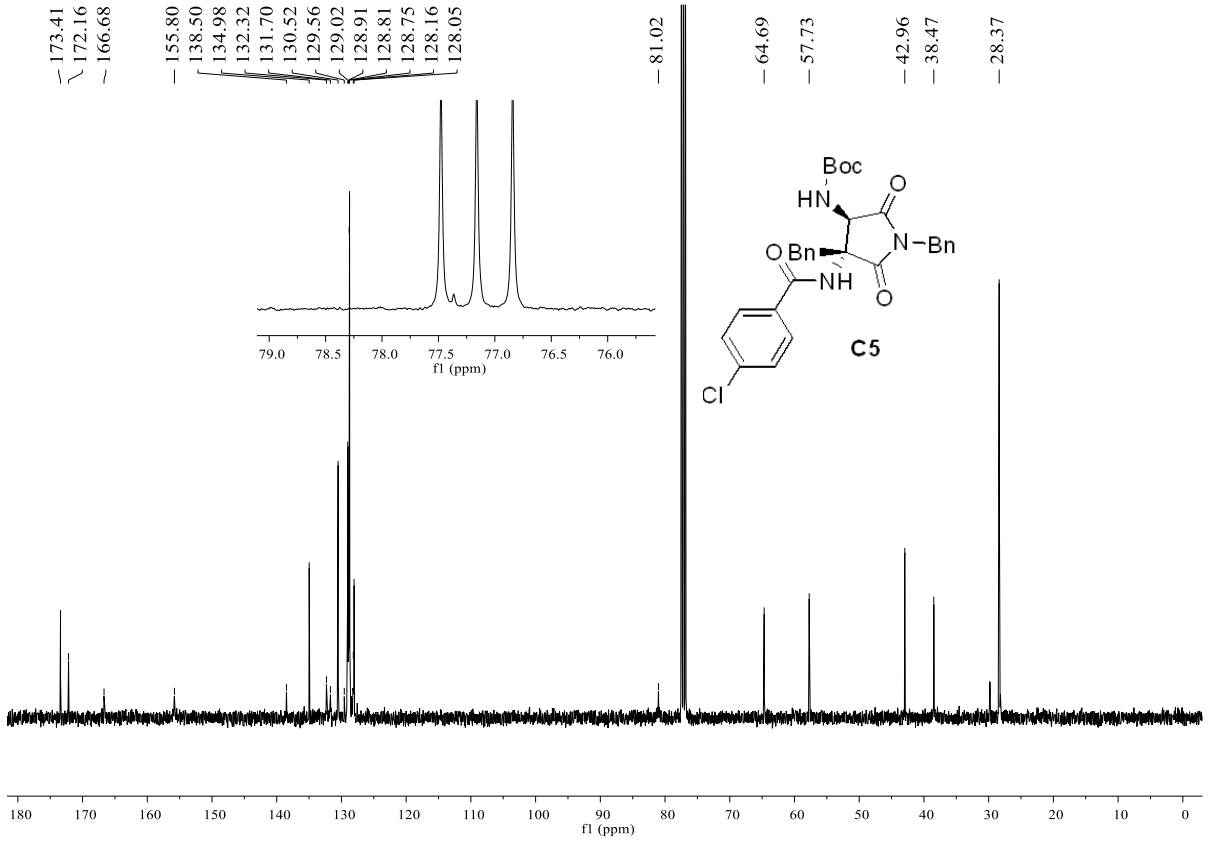



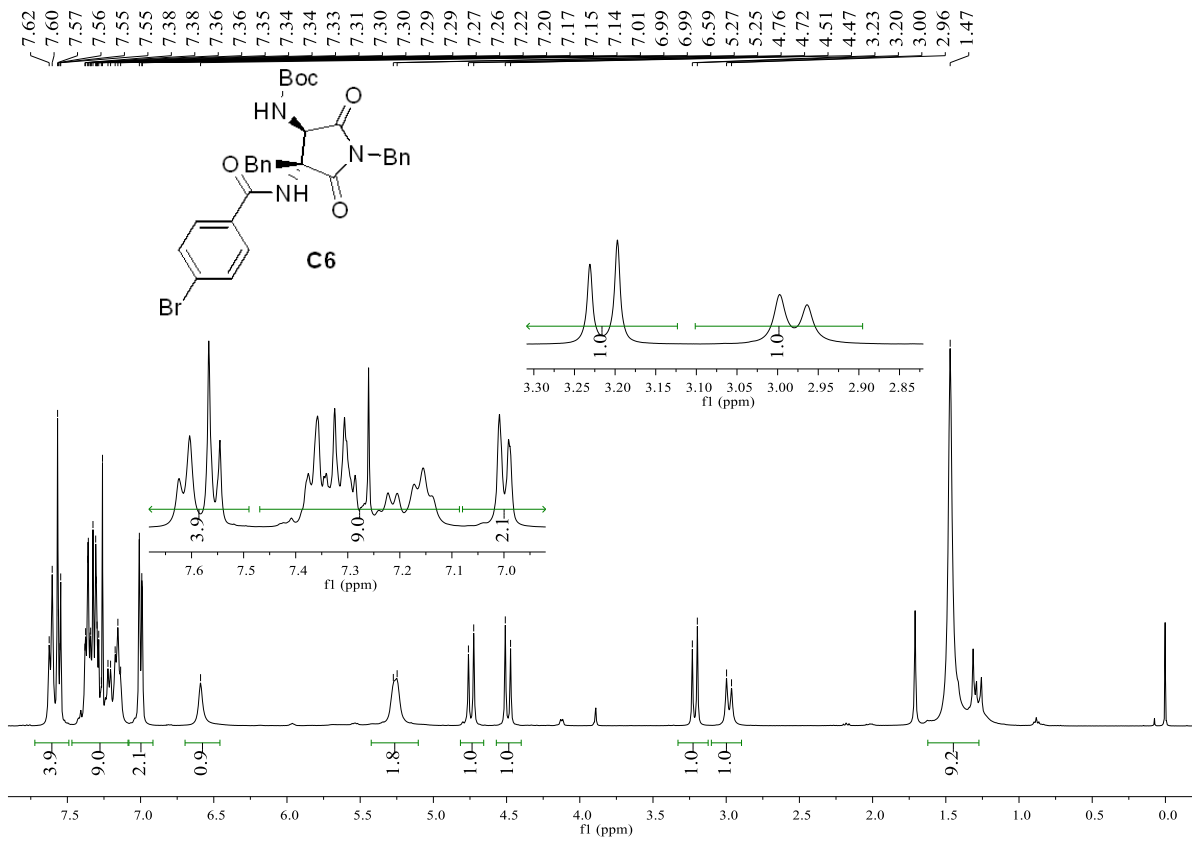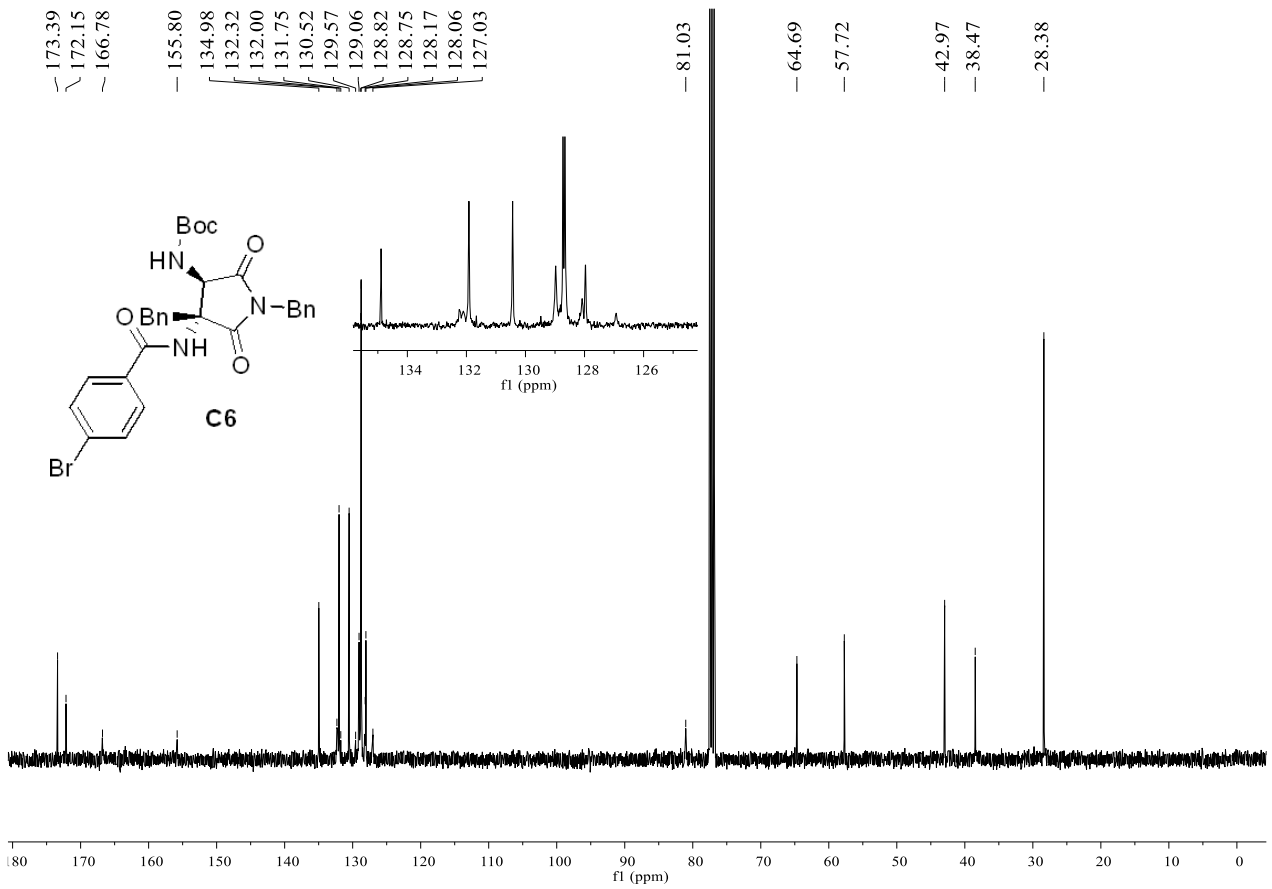

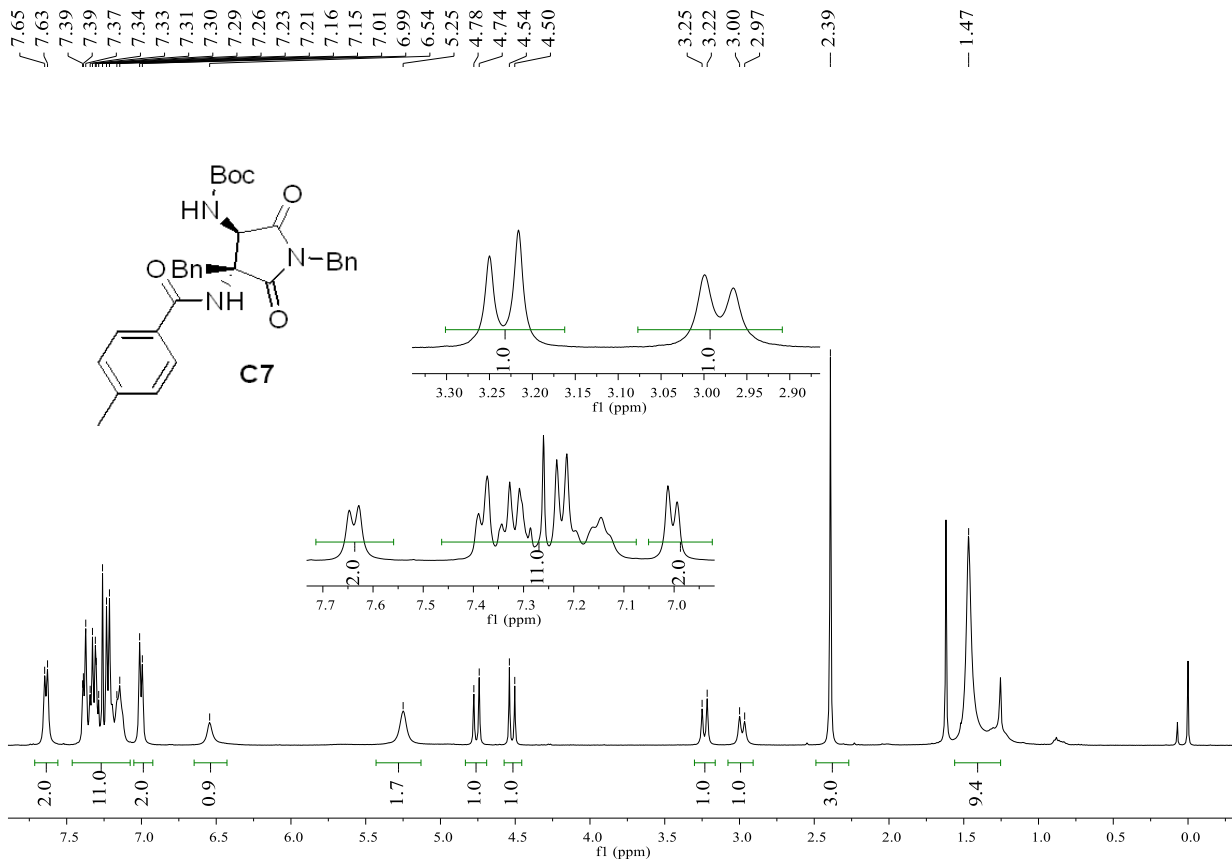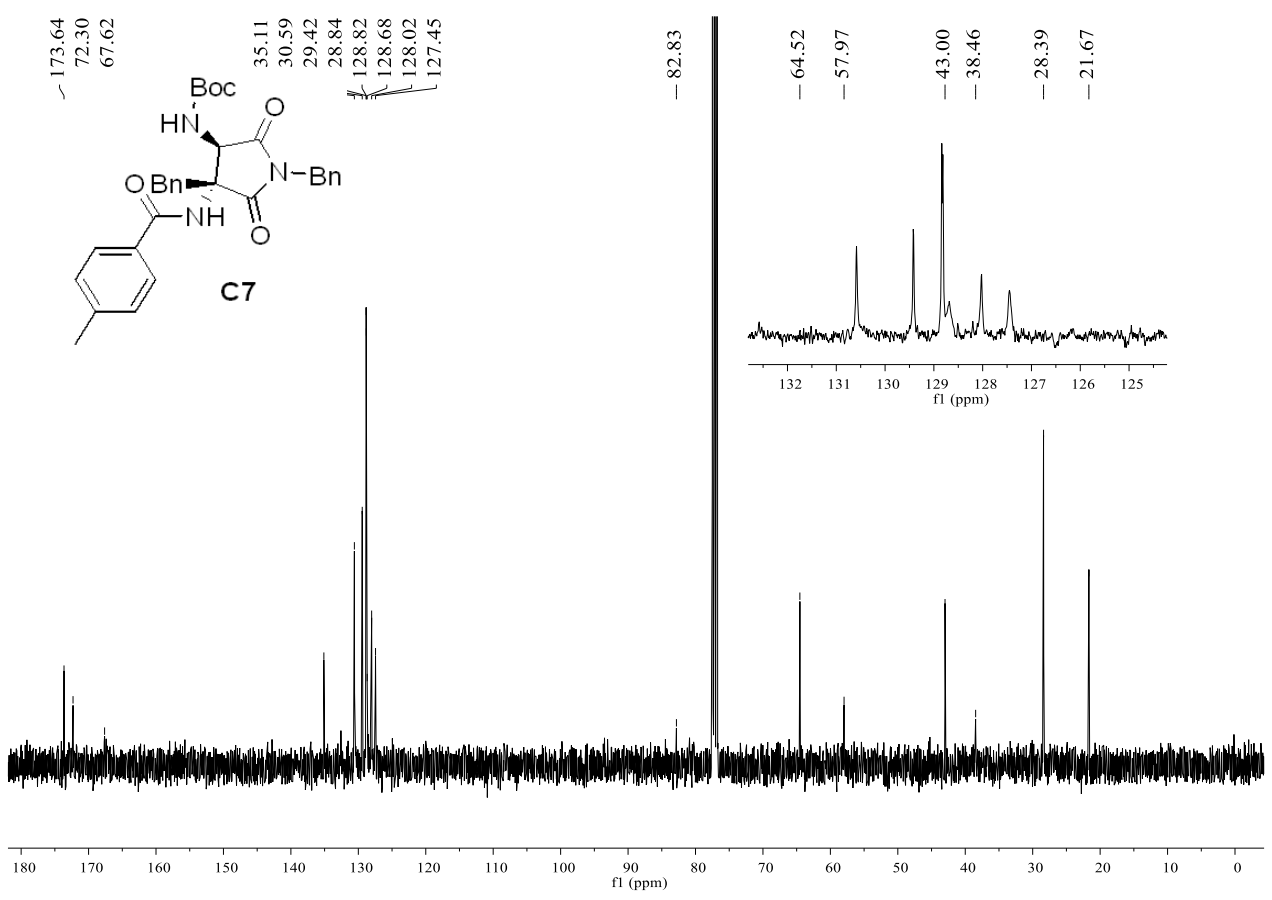

7.72  
7.69  
7.39  
7.39  
7.38  
7.37  
7.37  
7.36  
7.35  
7.34  
7.33  
7.31  
7.30  
7.30  
7.29  
7.28  
7.27  
7.26  
7.21  
7.19  
7.16  
7.14  
7.13  
7.01  
6.99  
6.92  
6.91  
6.90  
6.90  
6.51  
6.51  
5.25  
4.77  
4.74  
4.54  
4.50  
3.84  
3.25  
3.21  
2.99  
1.47

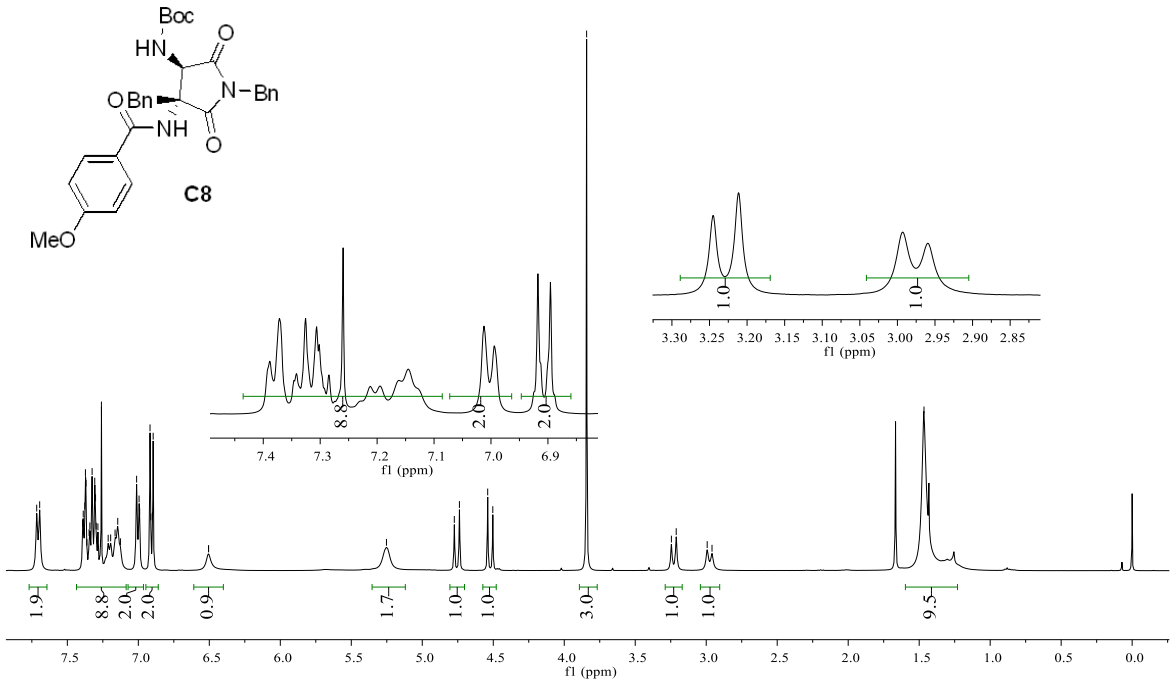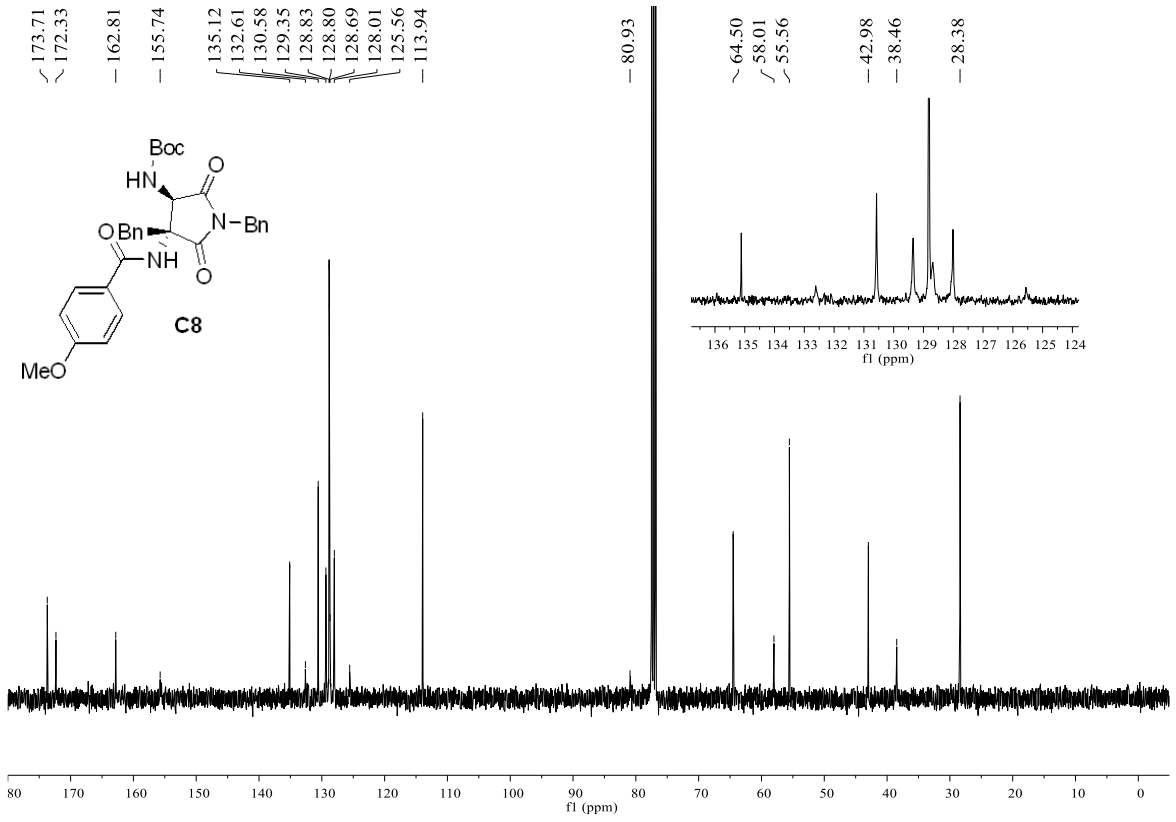

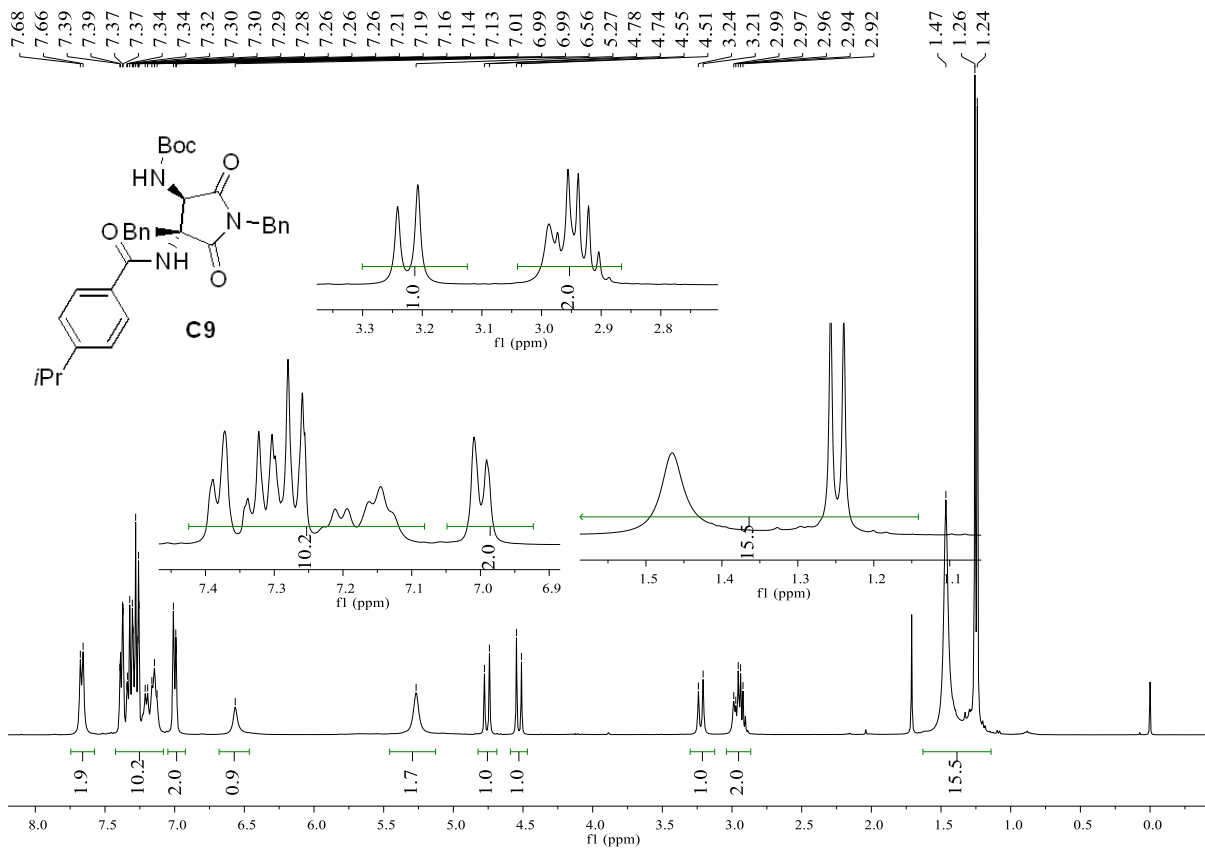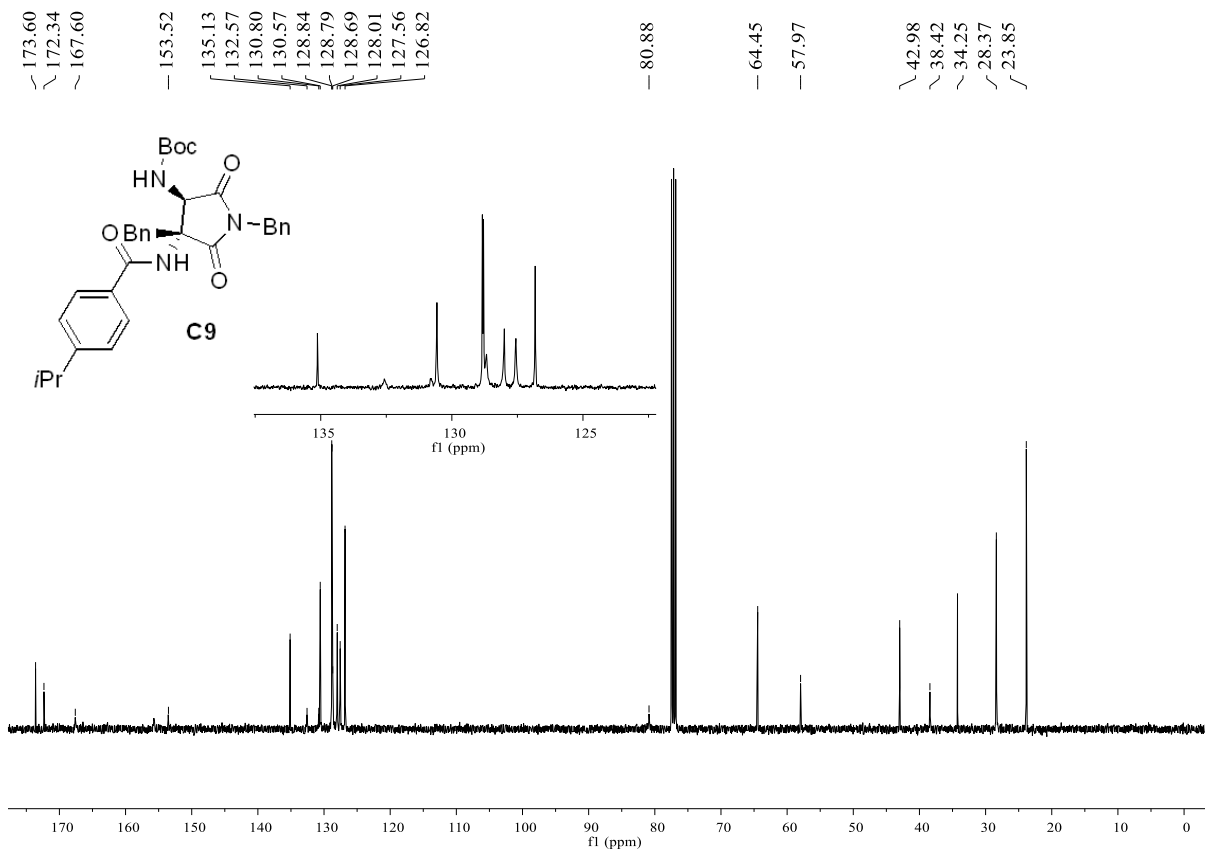

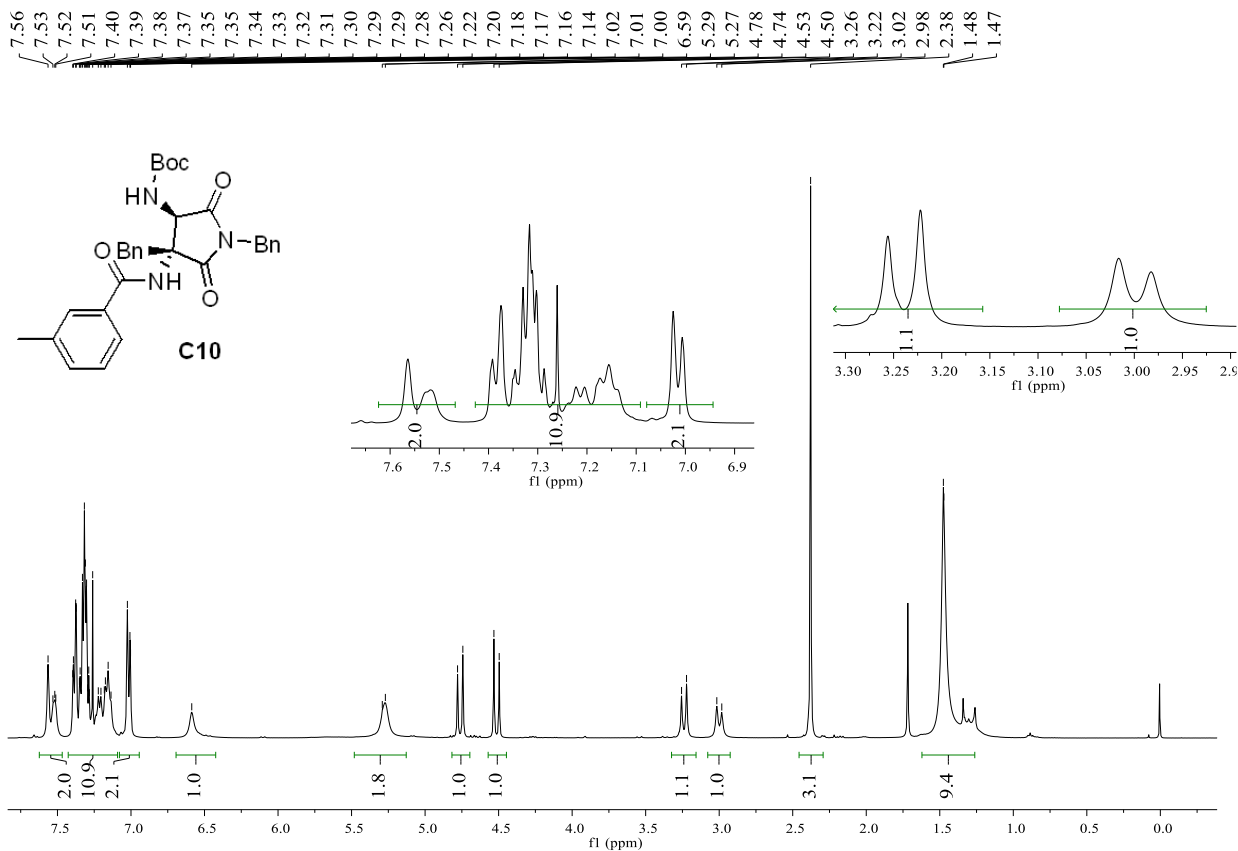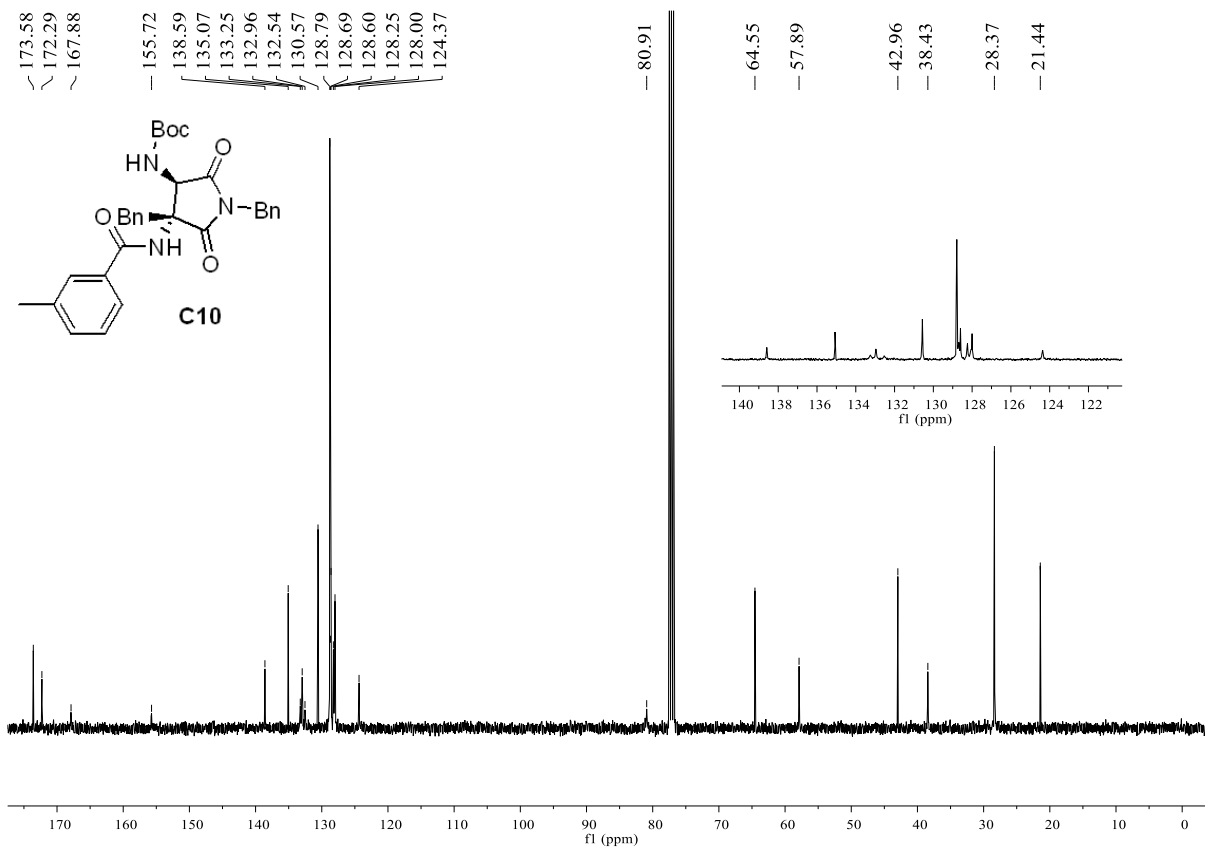

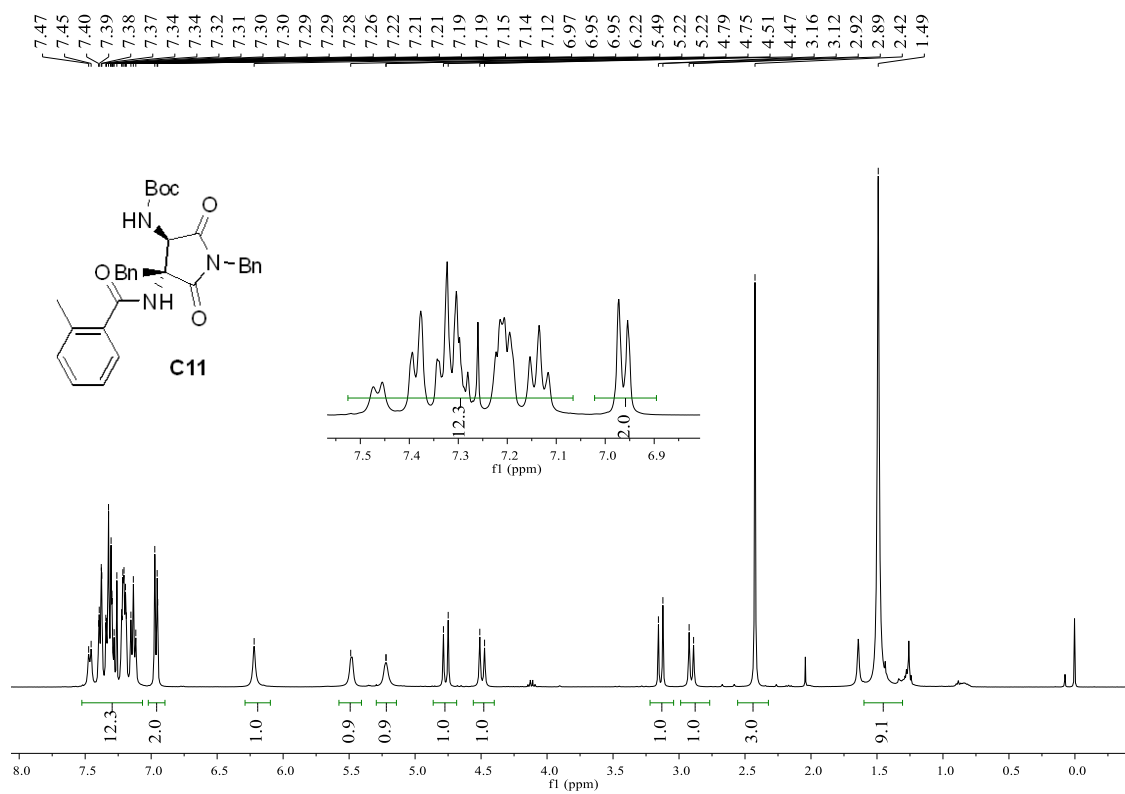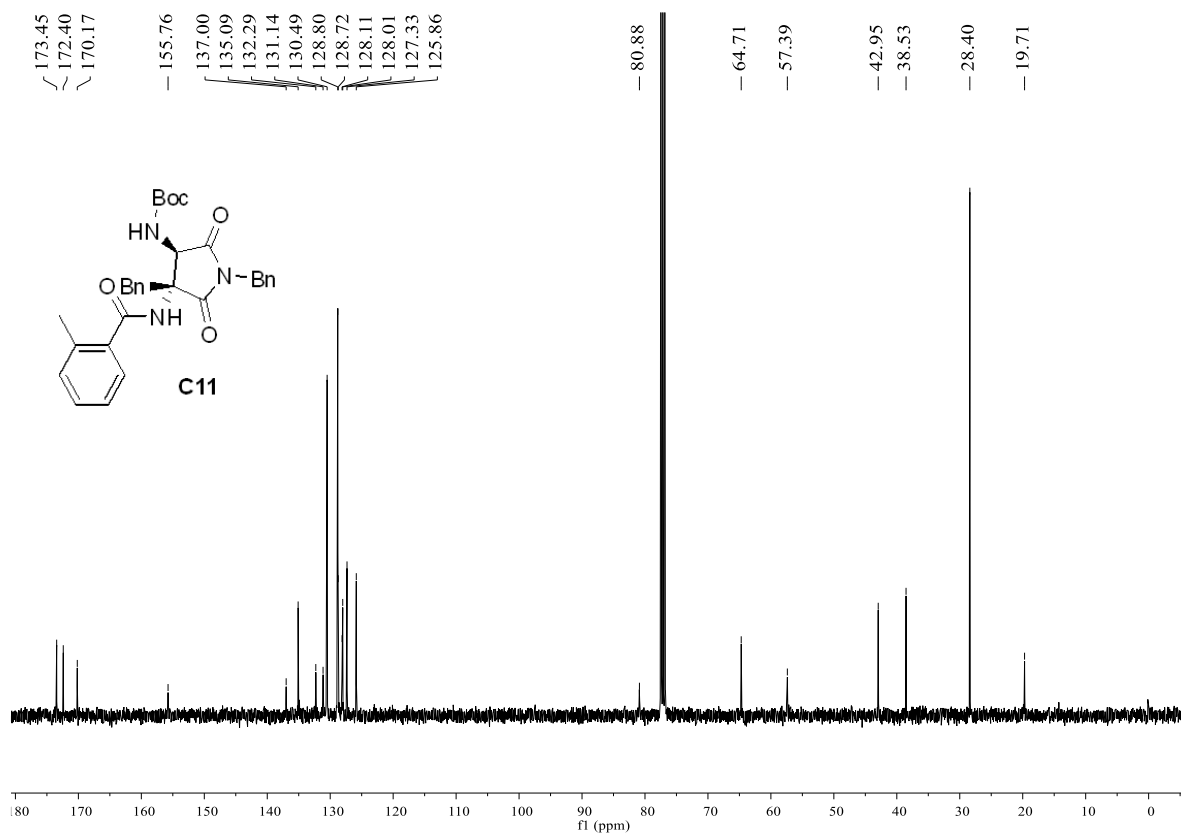

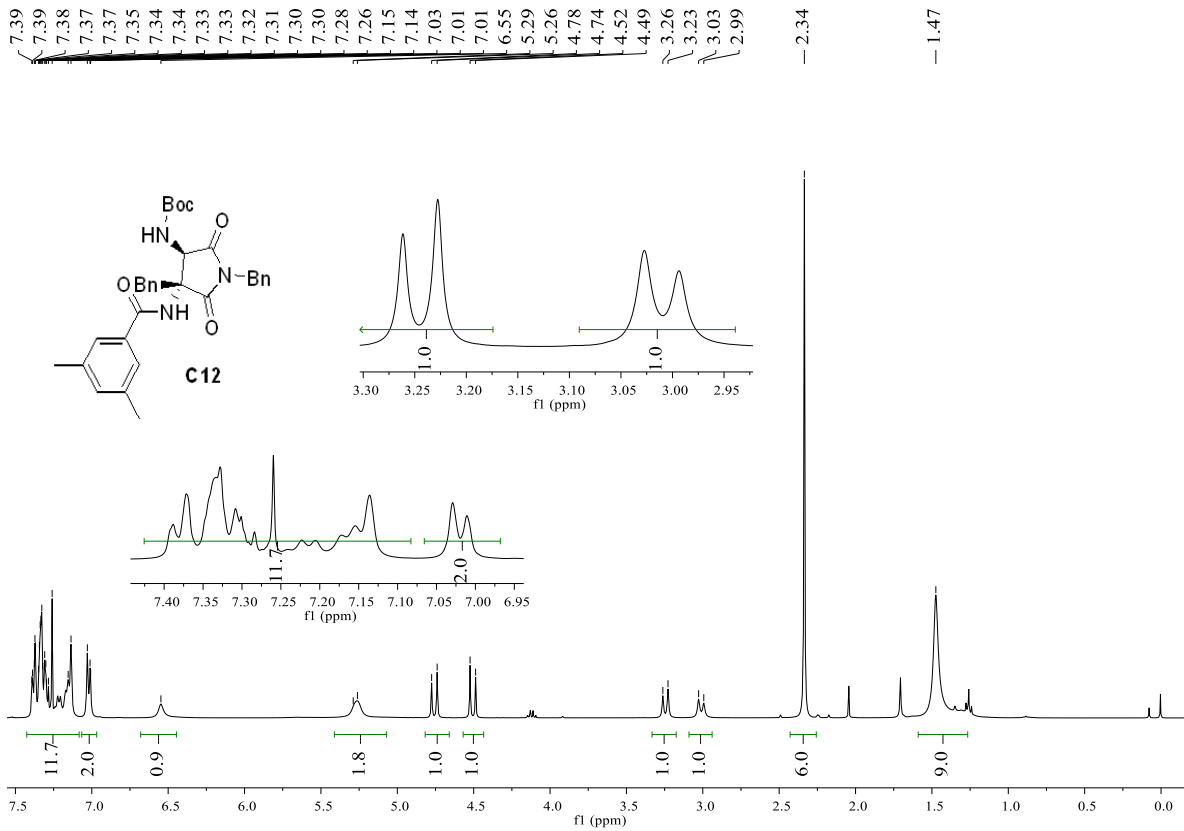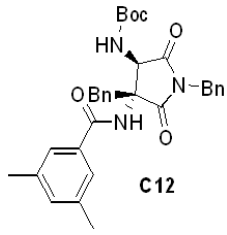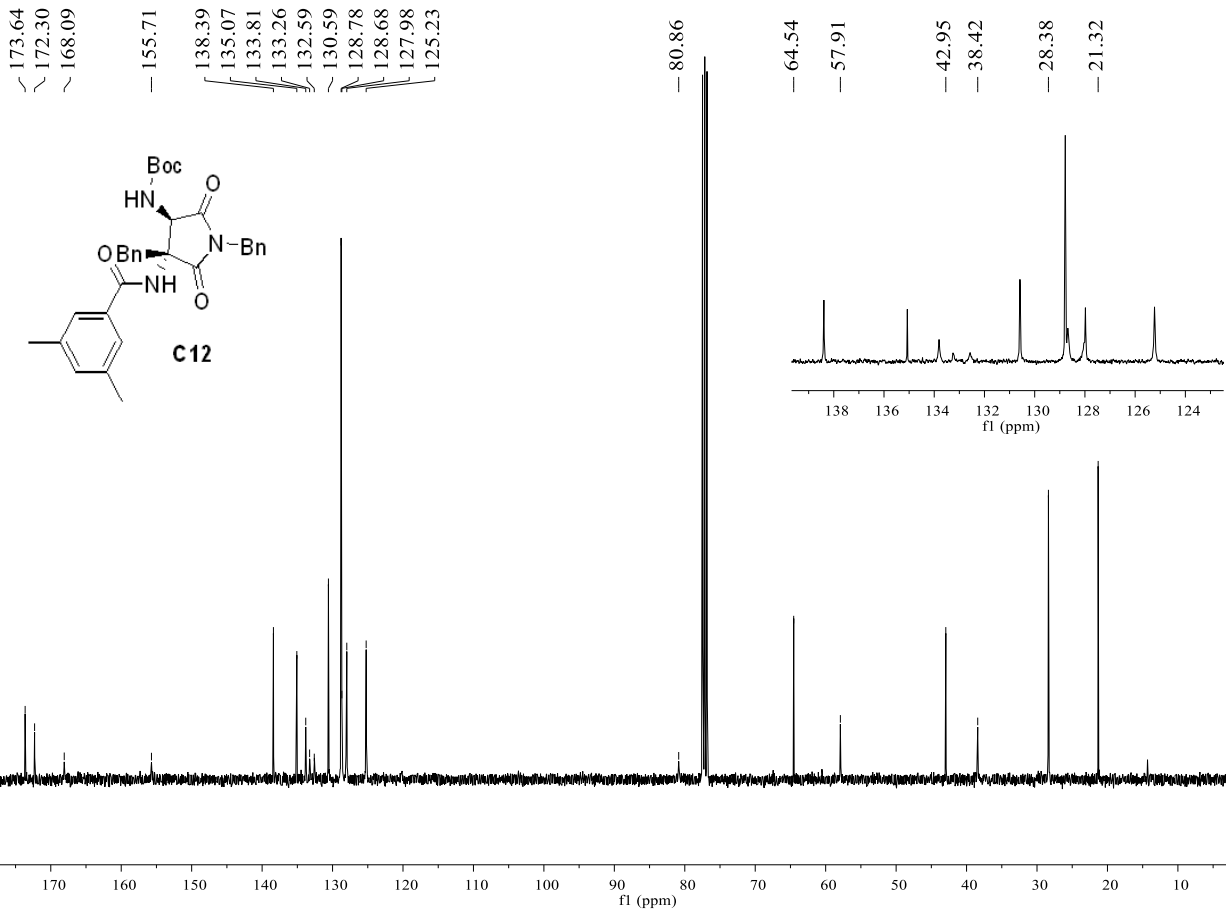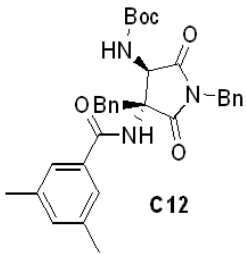

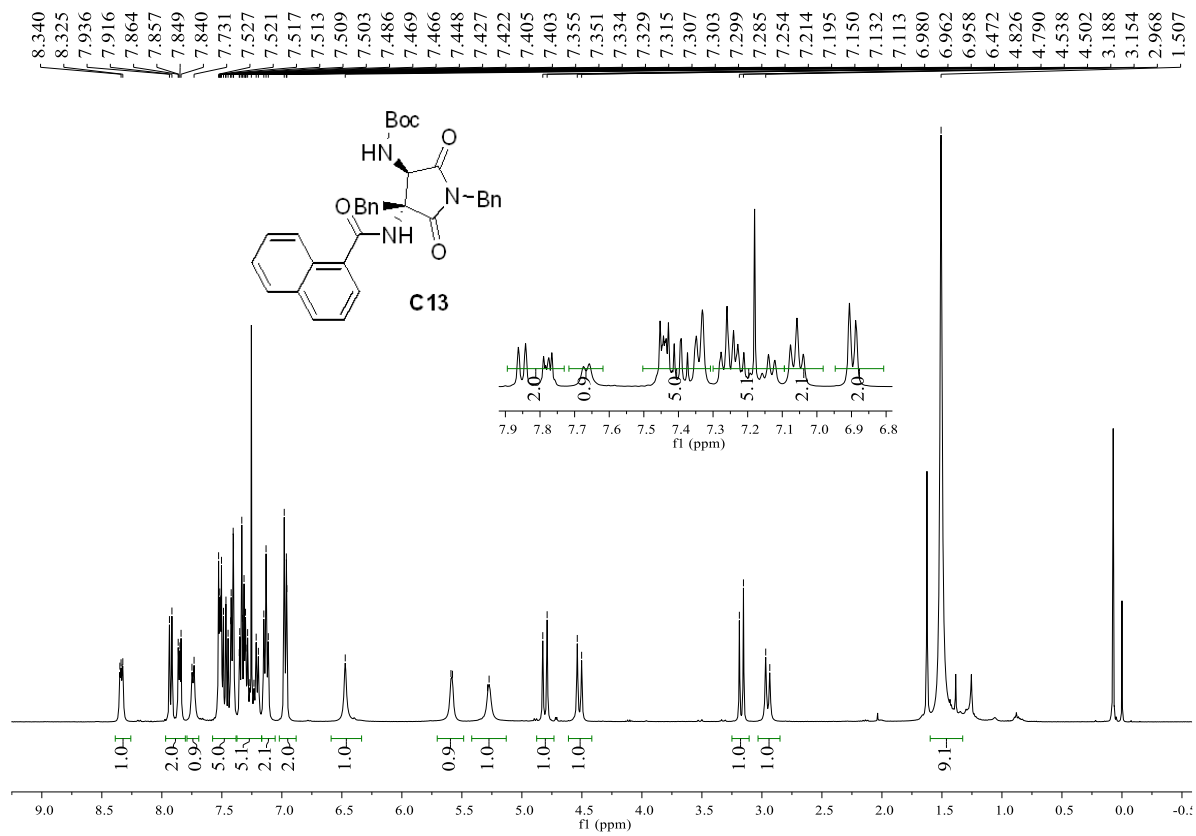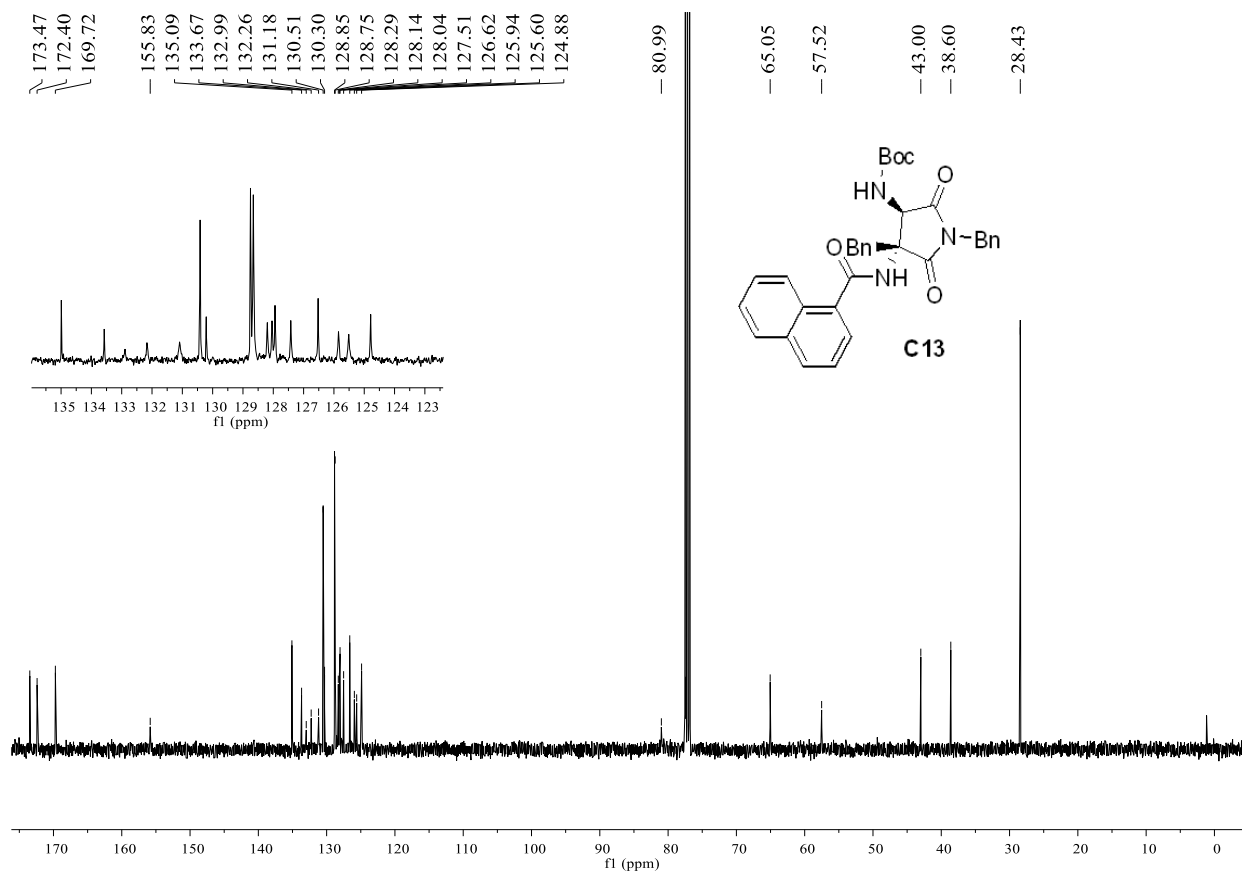



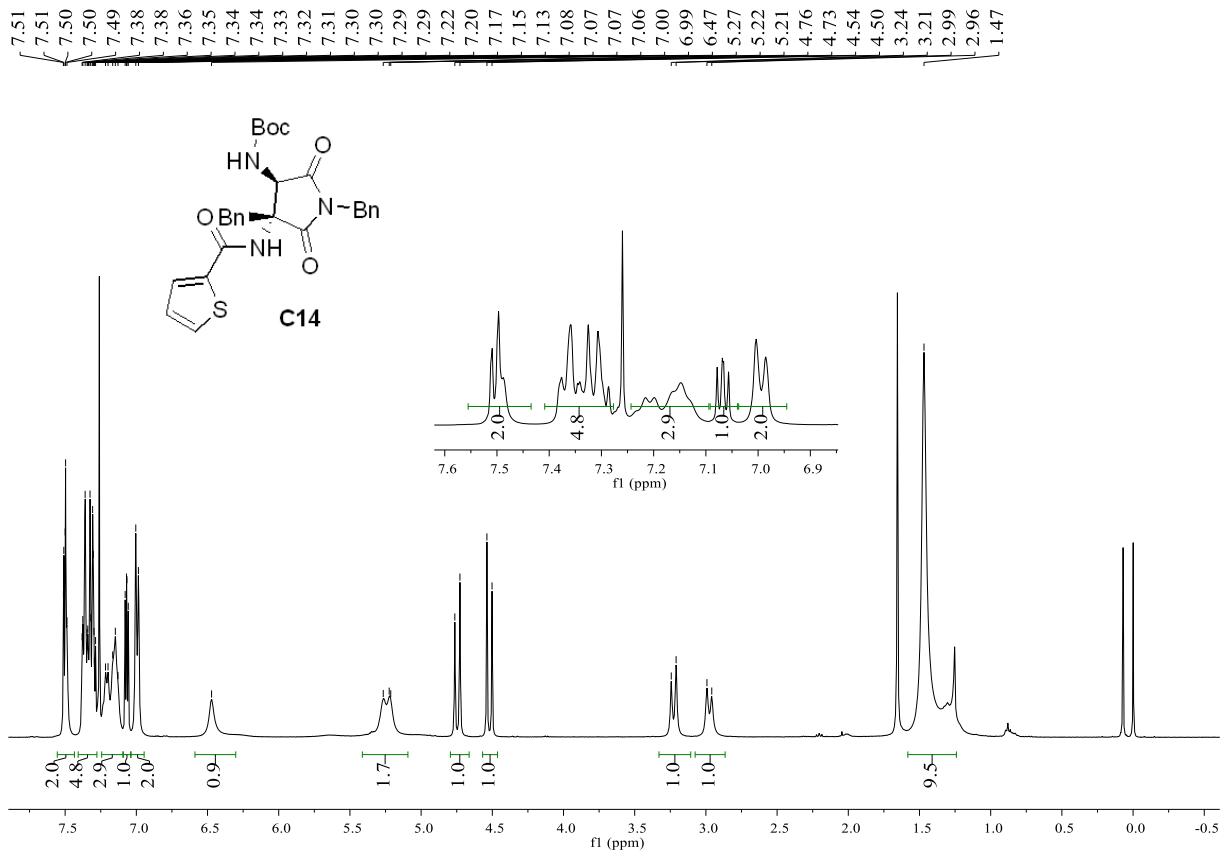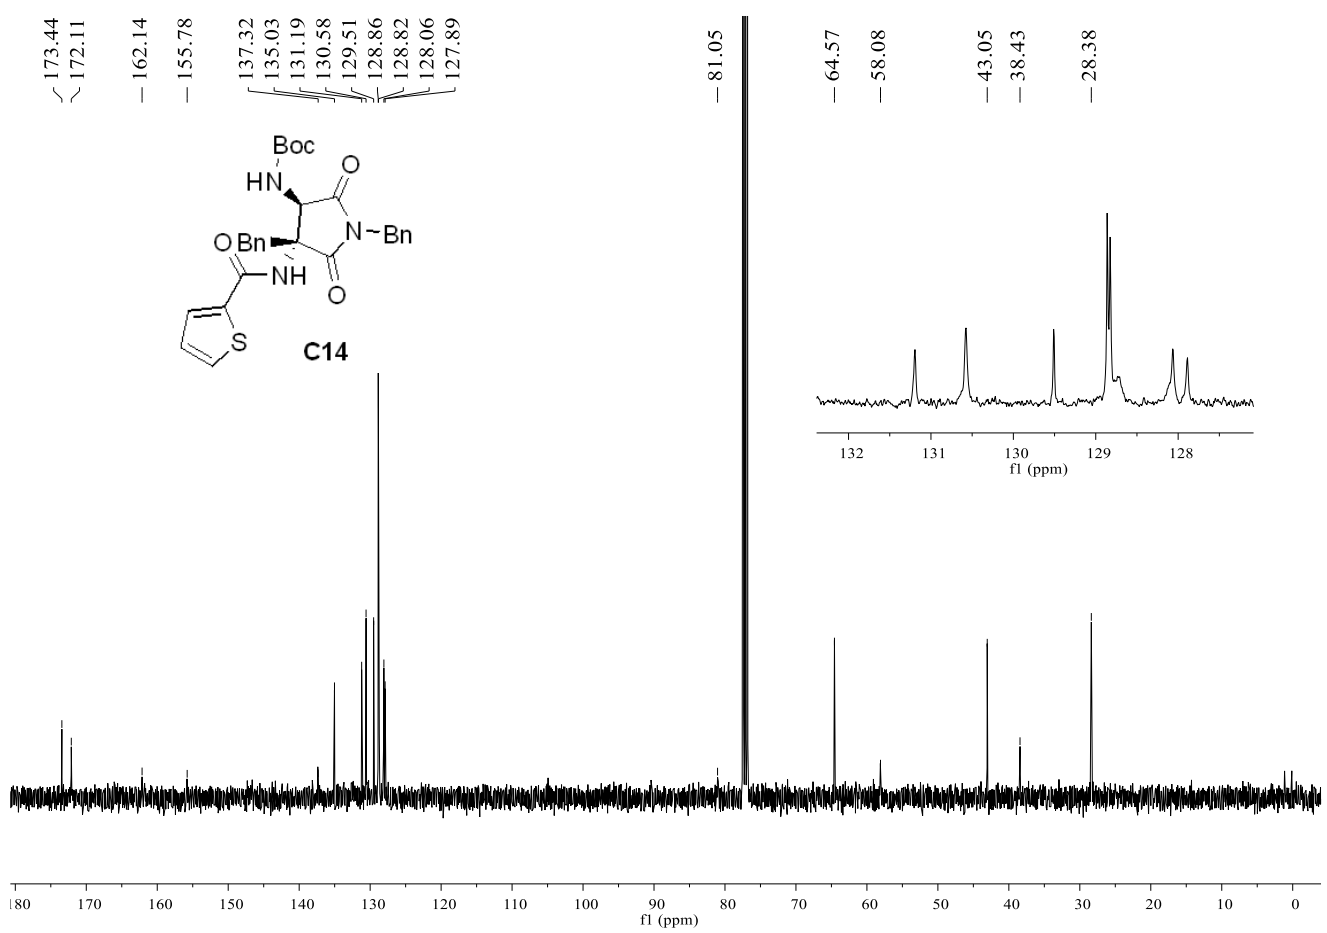

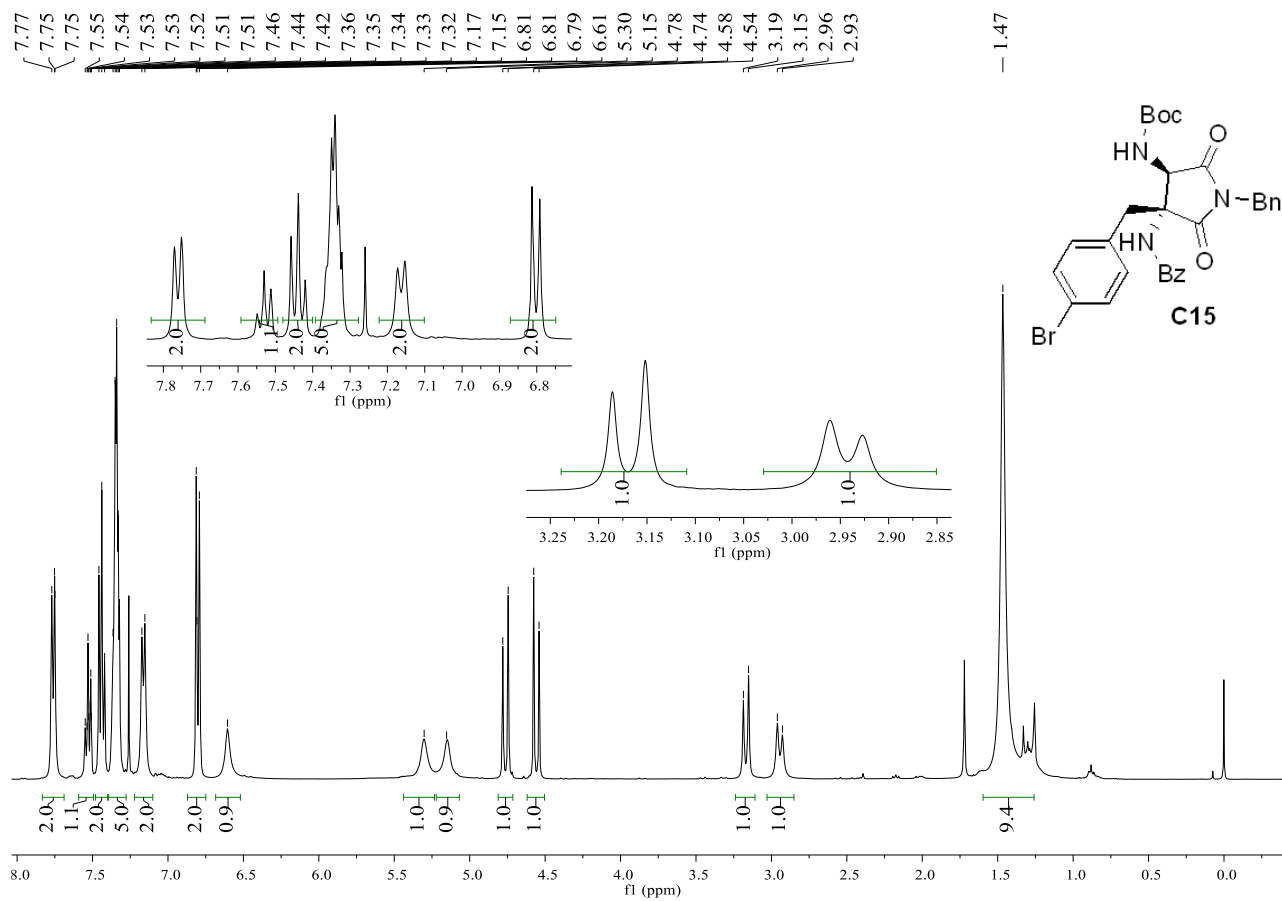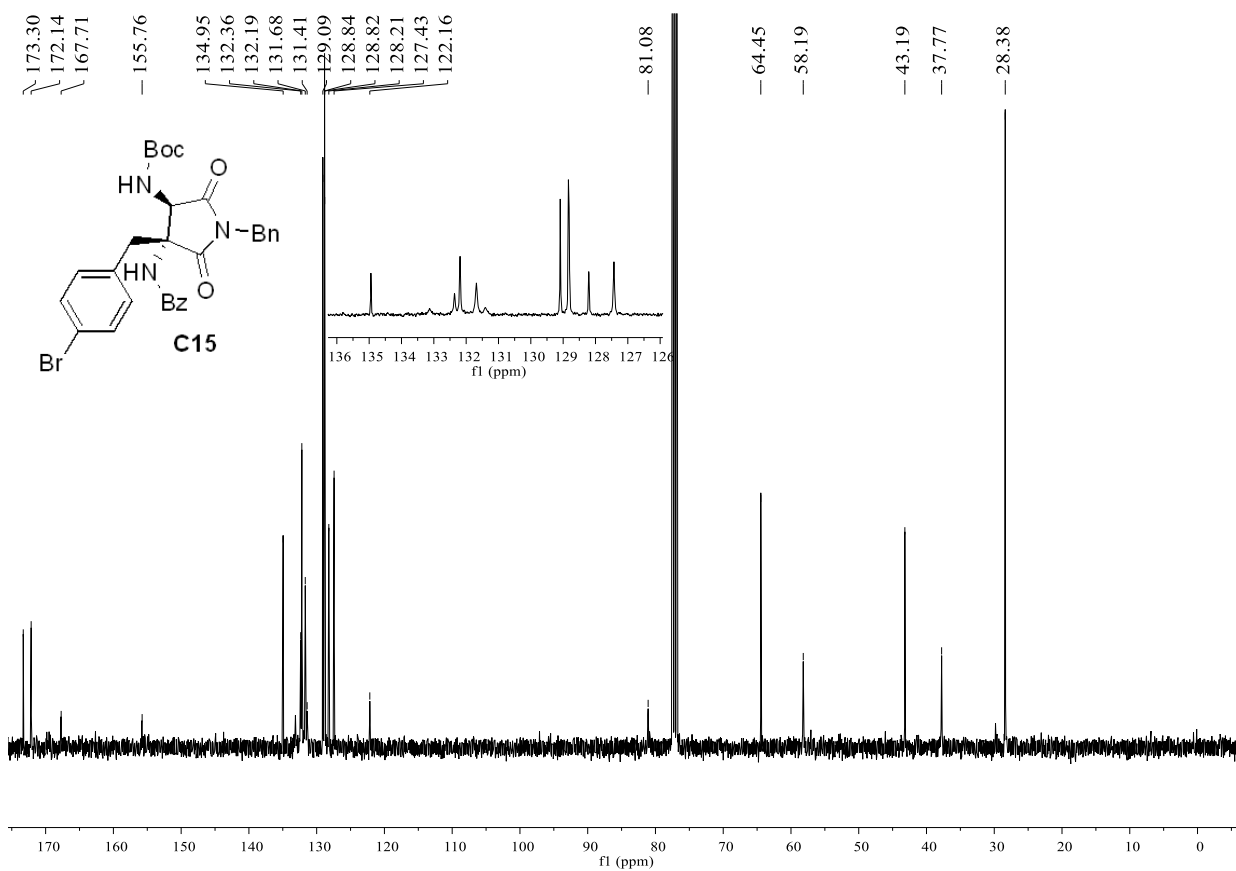

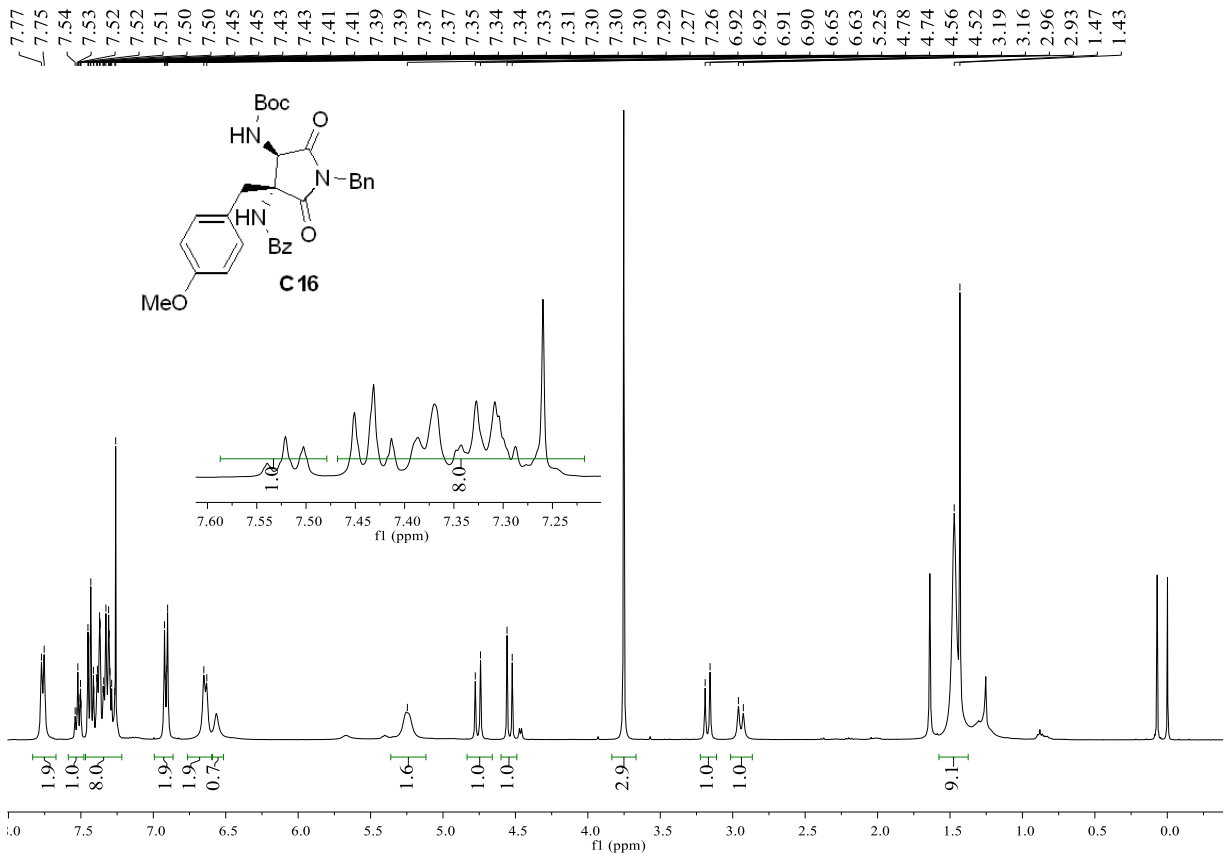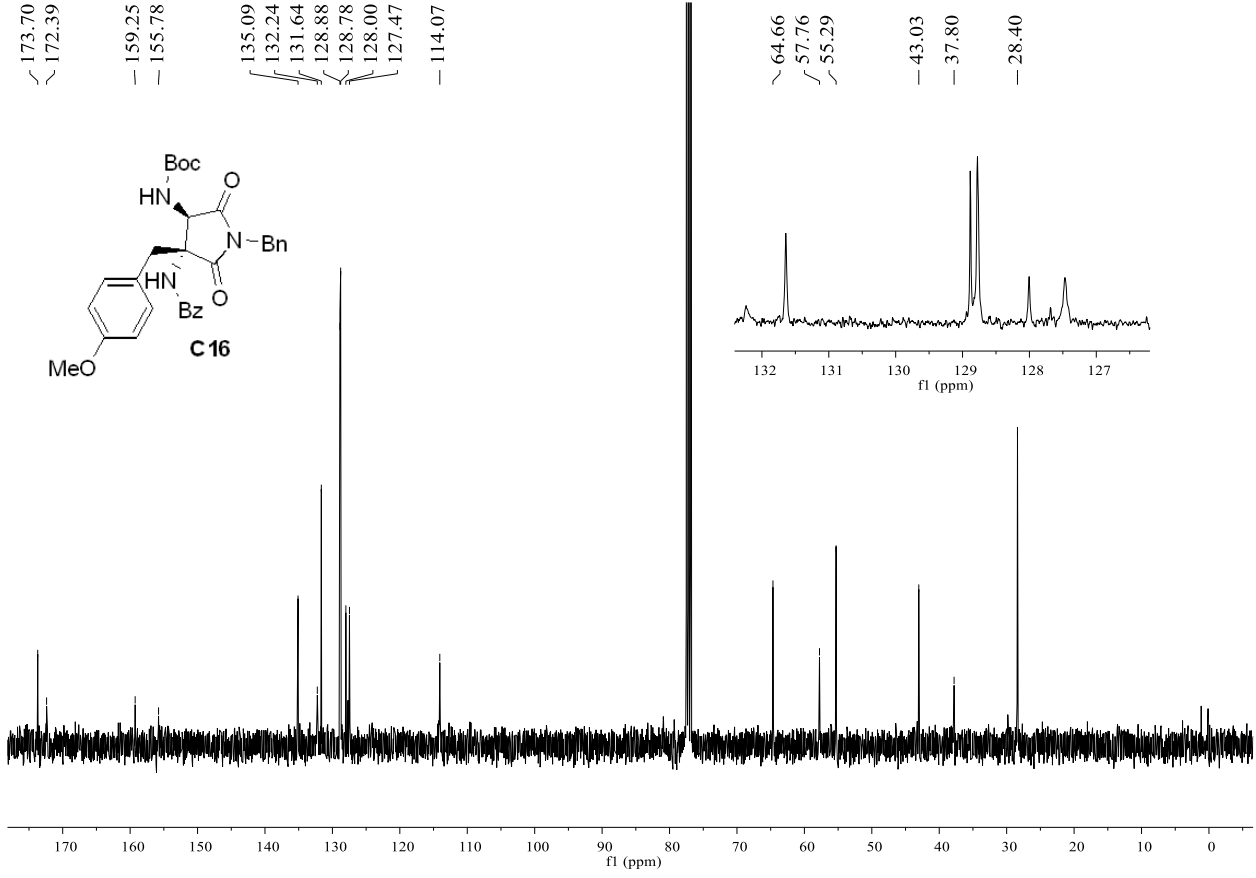

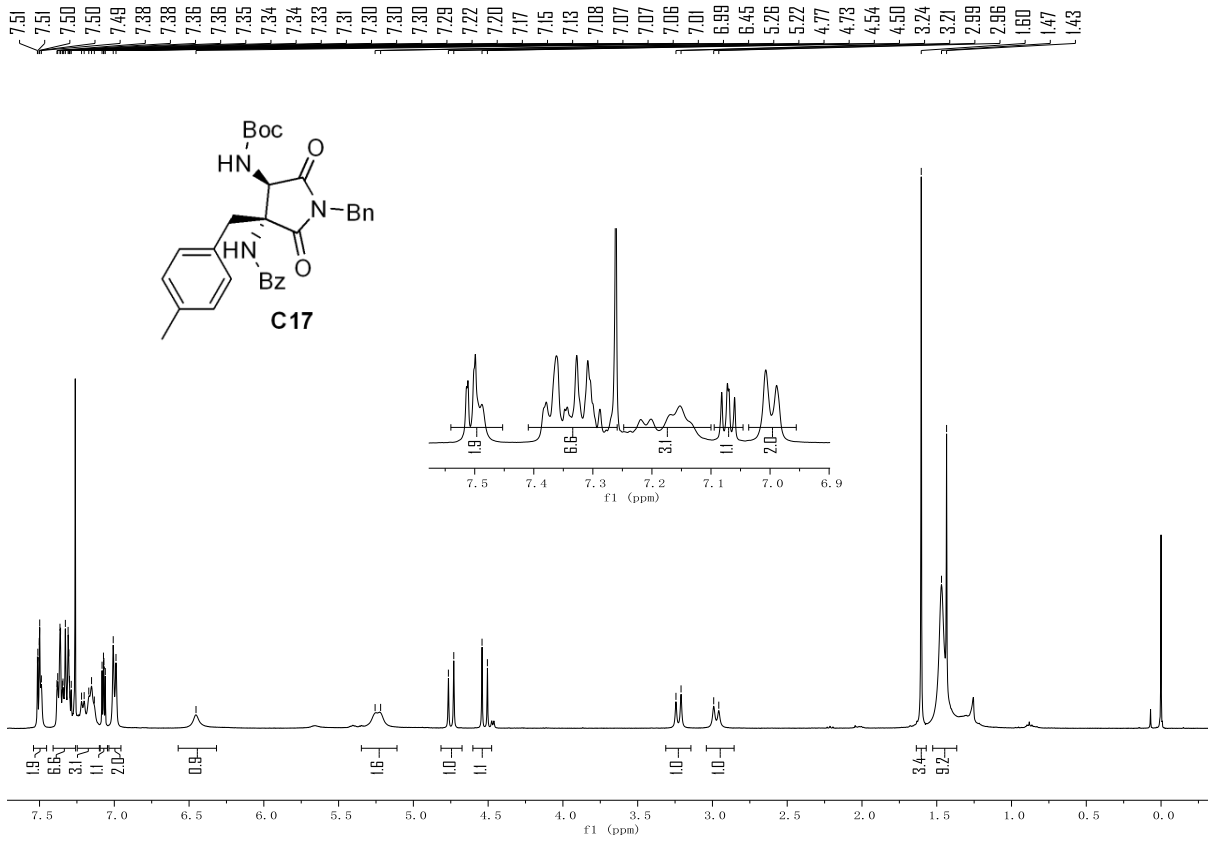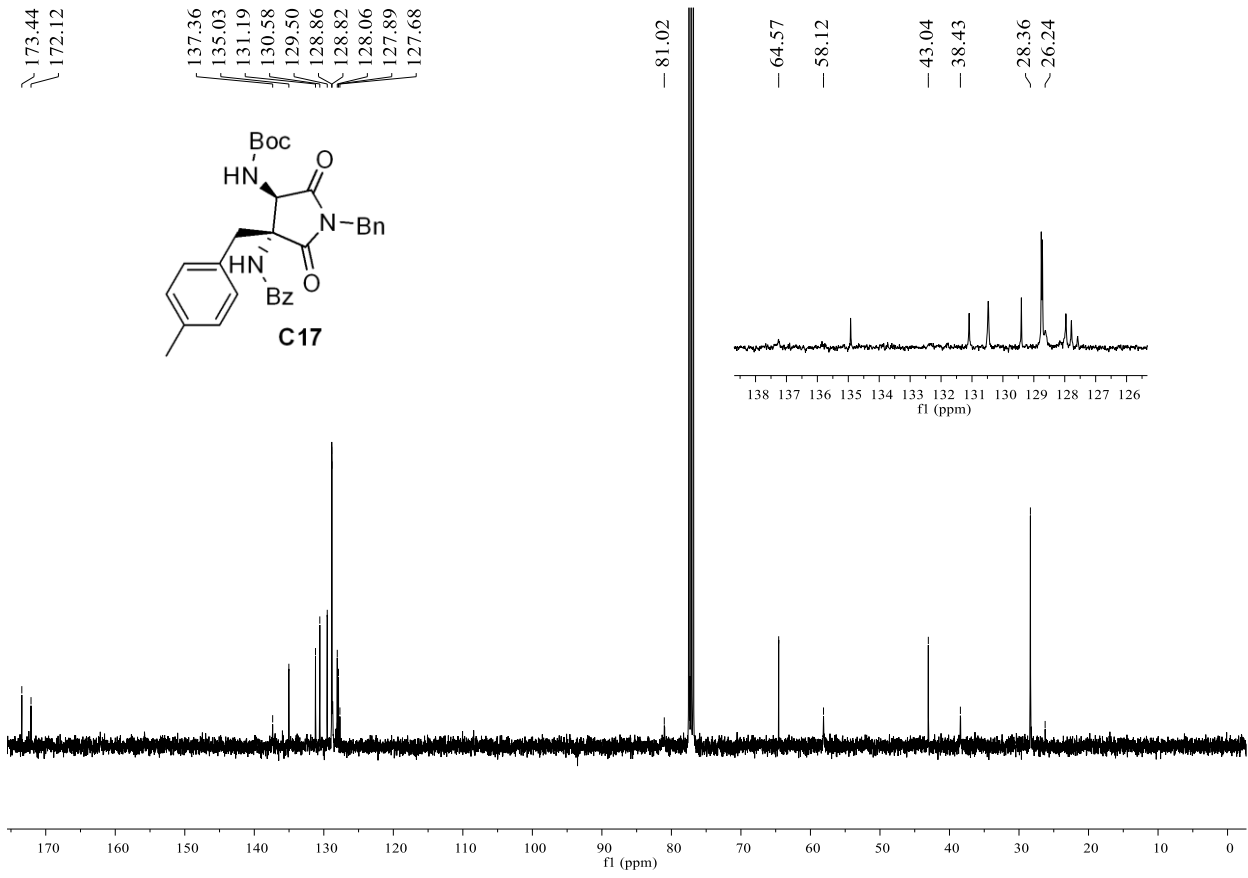

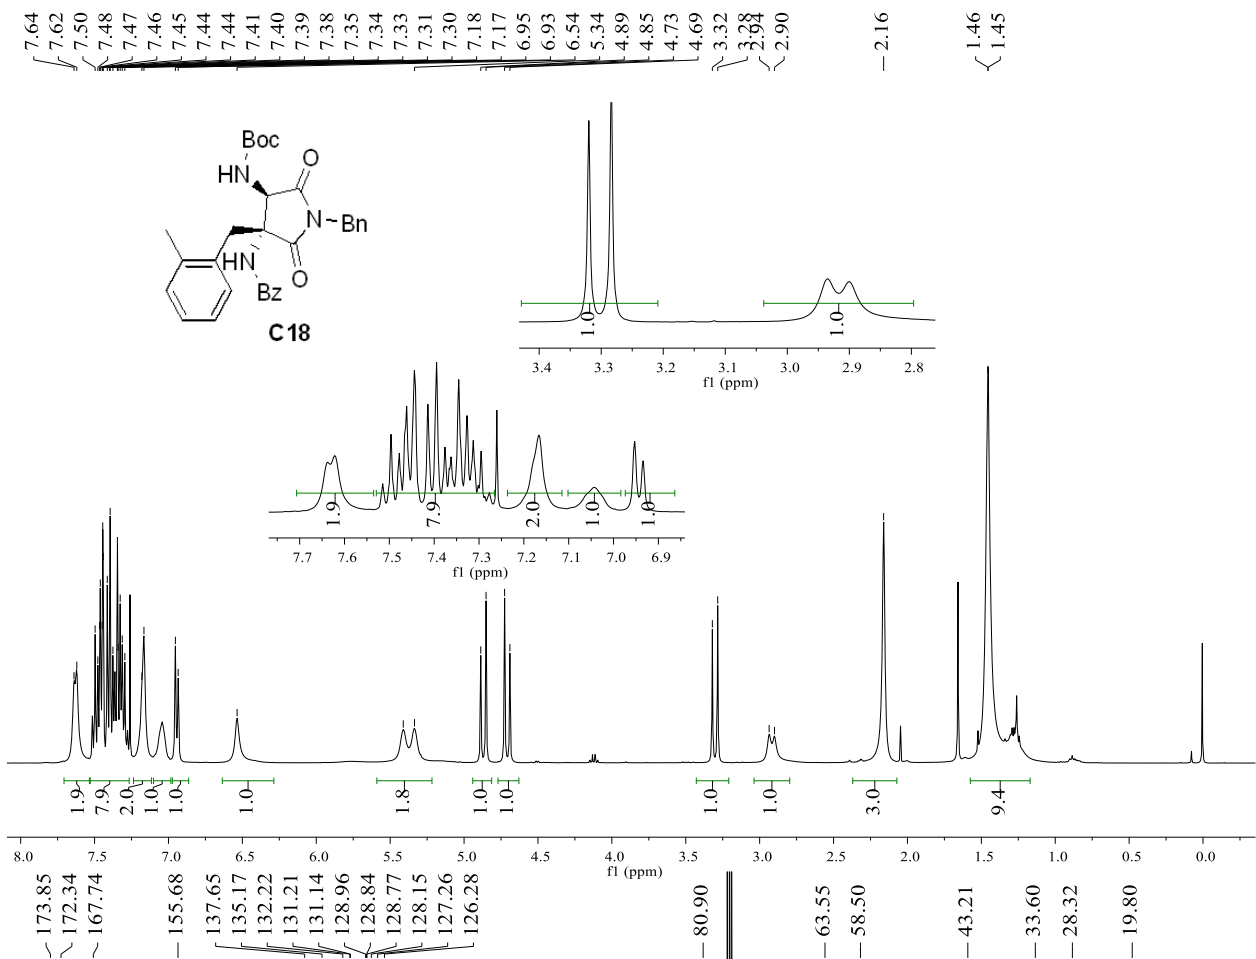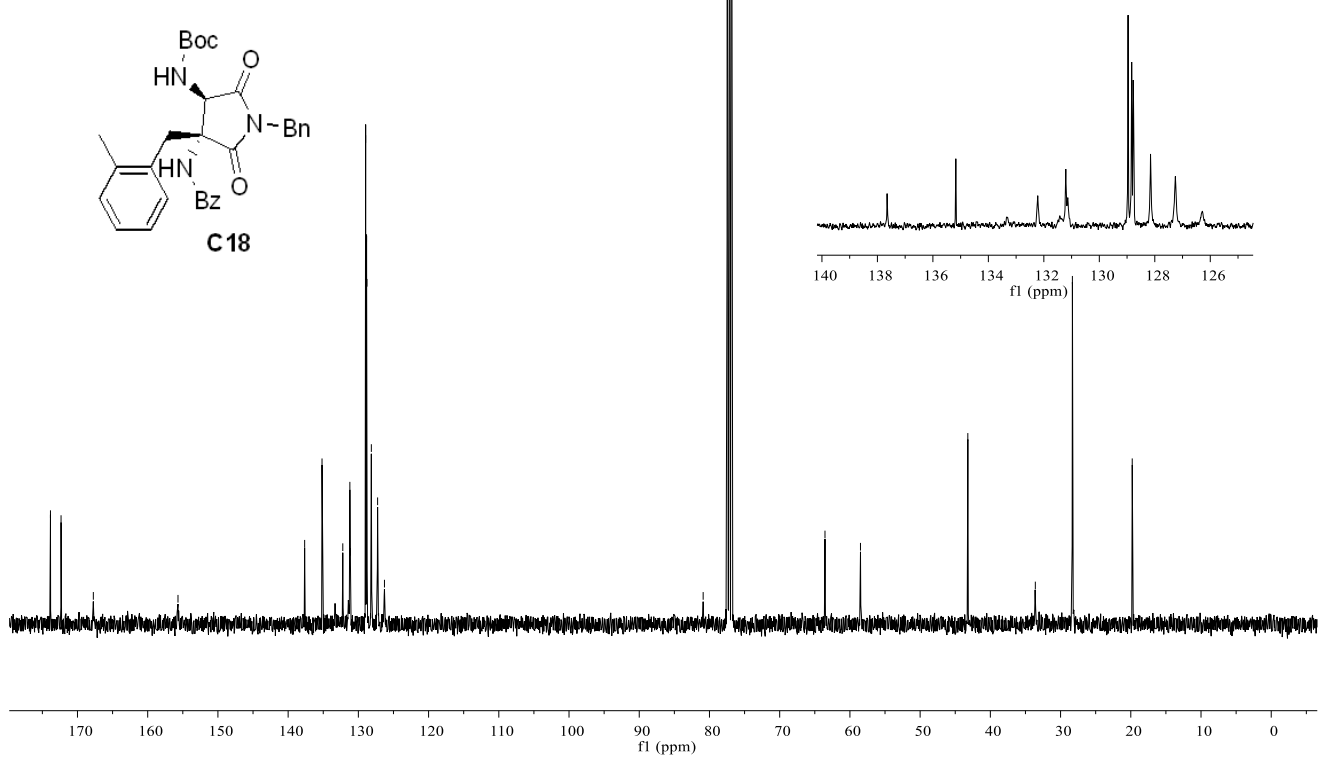

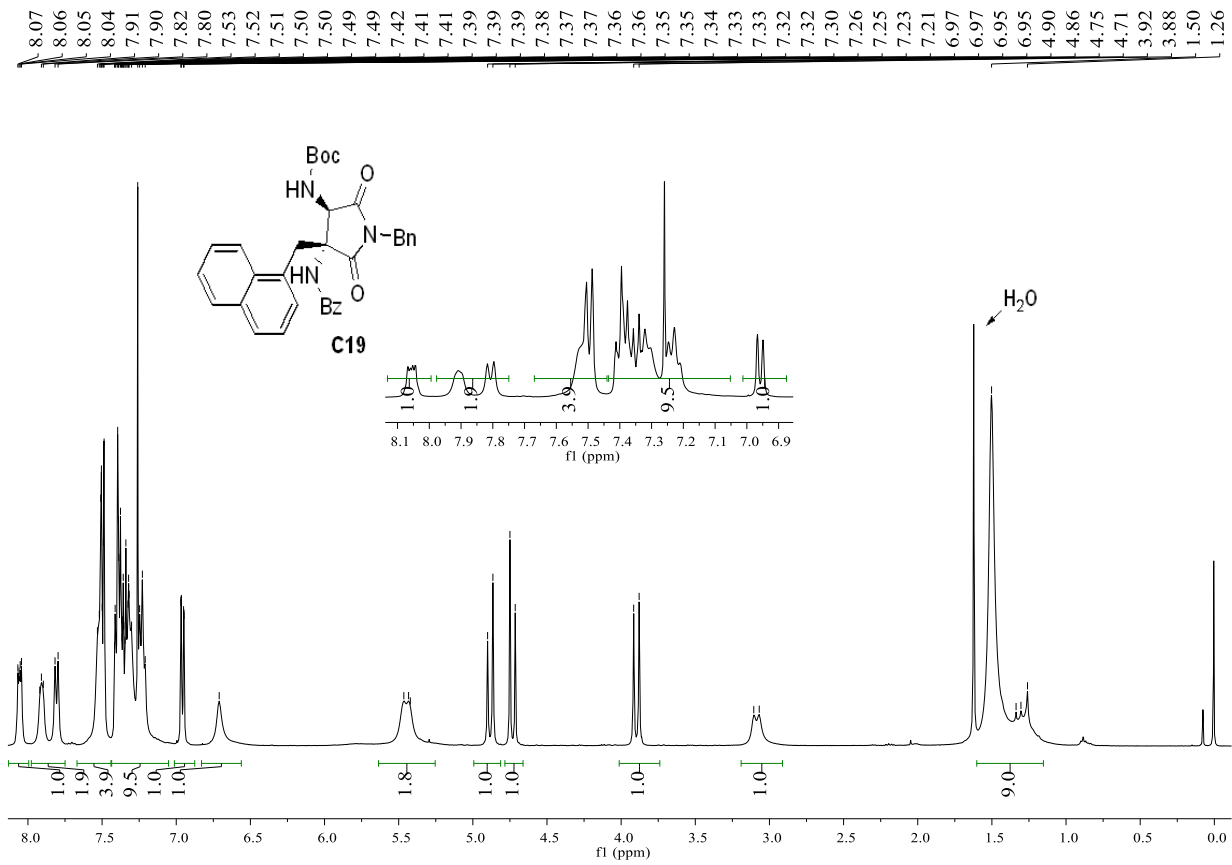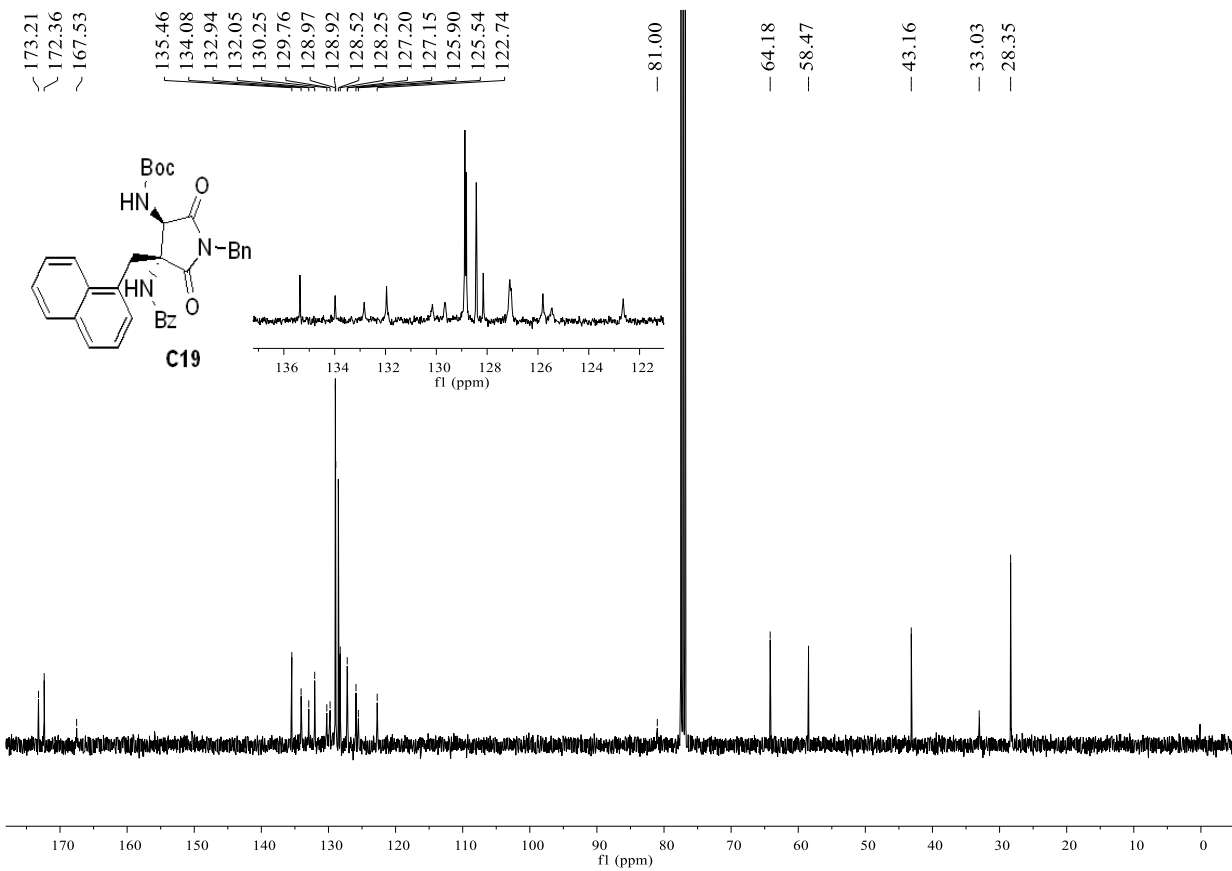

7.77  
7.76  
7.74  
7.08  
7.07  
7.05  
7.05  
— 6.70

5.36  
— 5.29  
4.82  
4.78  
4.53  
4.50

3.43  
3.39  
3.17  
3.13

— 1.50

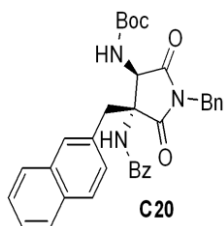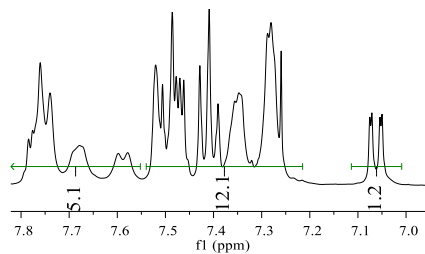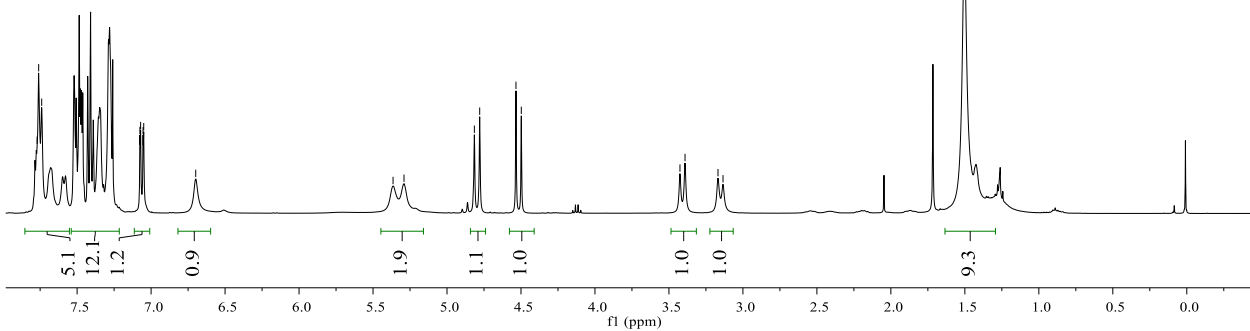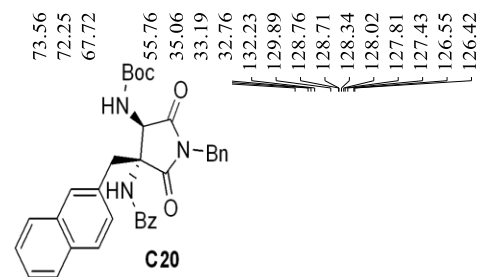

73.56  
72.25  
67.72  
55.76  
35.06  
33.19  
32.76  
132.23  
129.89  
128.76  
128.71  
128.34  
128.02  
127.81  
127.43  
126.55  
126.42

— 80.92  
— 64.61  
— 58.10  
— 43.03  
— 38.59  
— 28.41

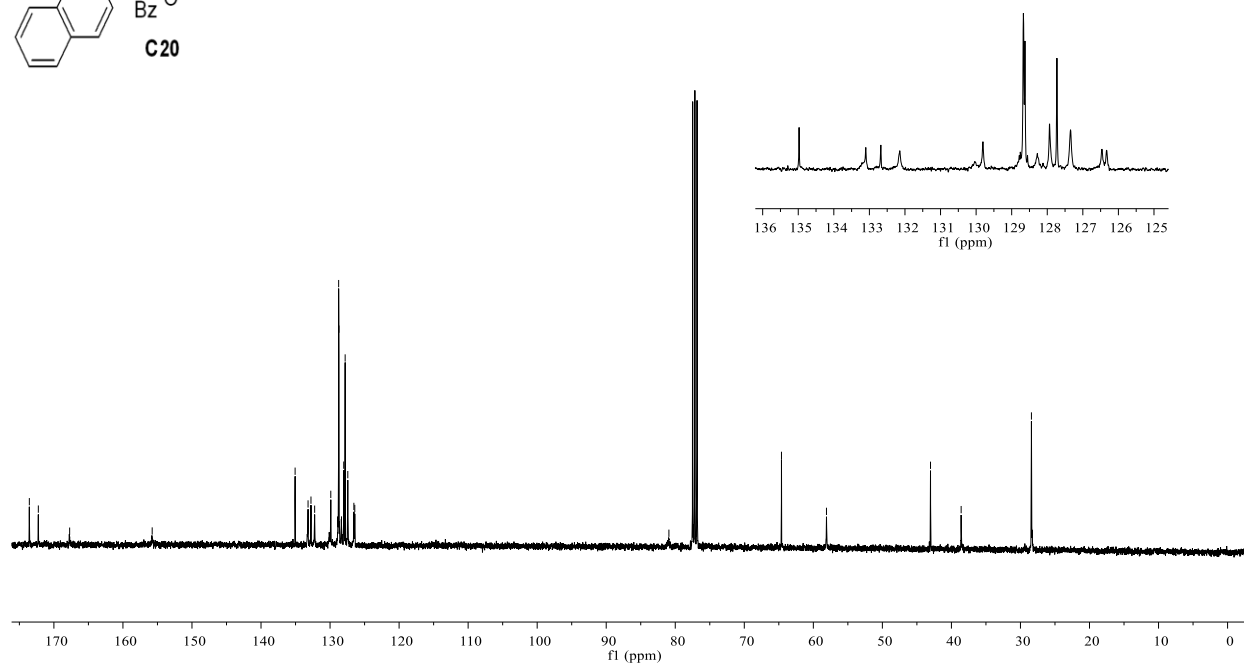

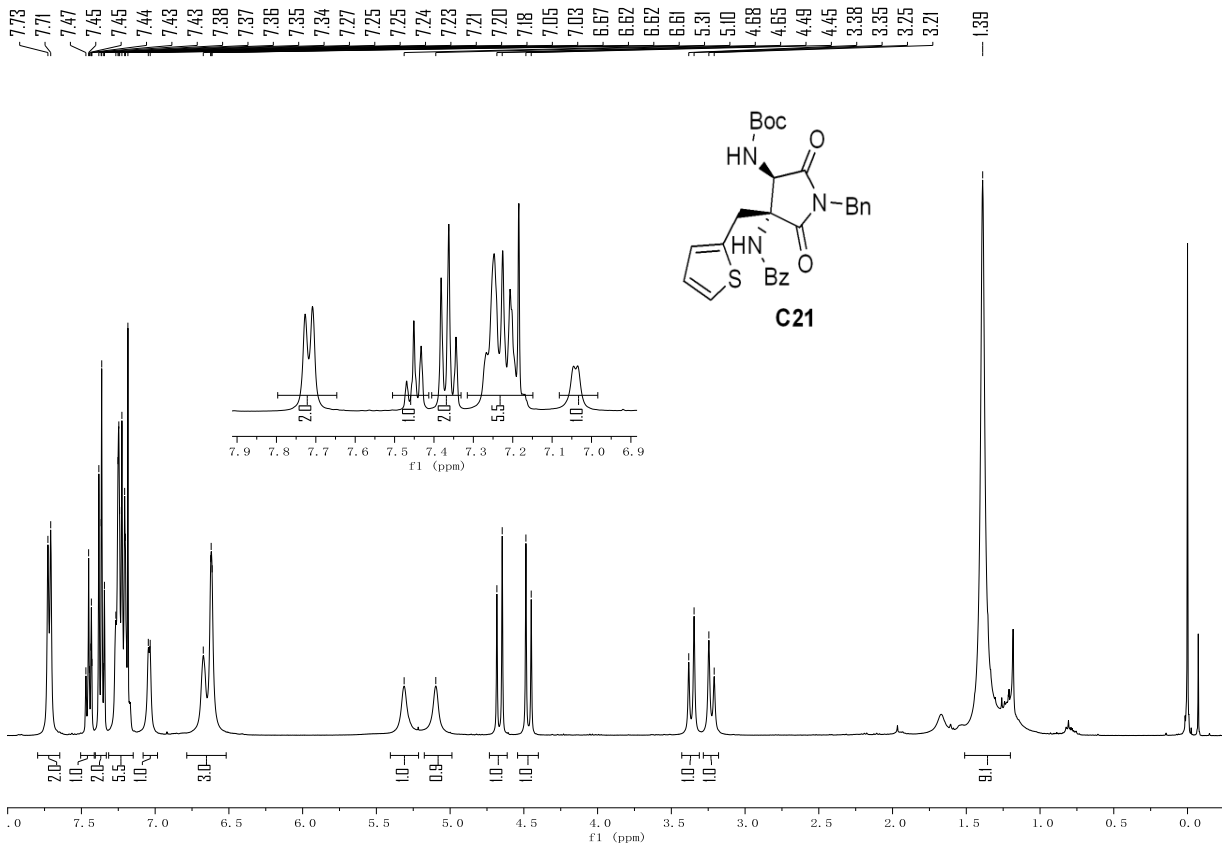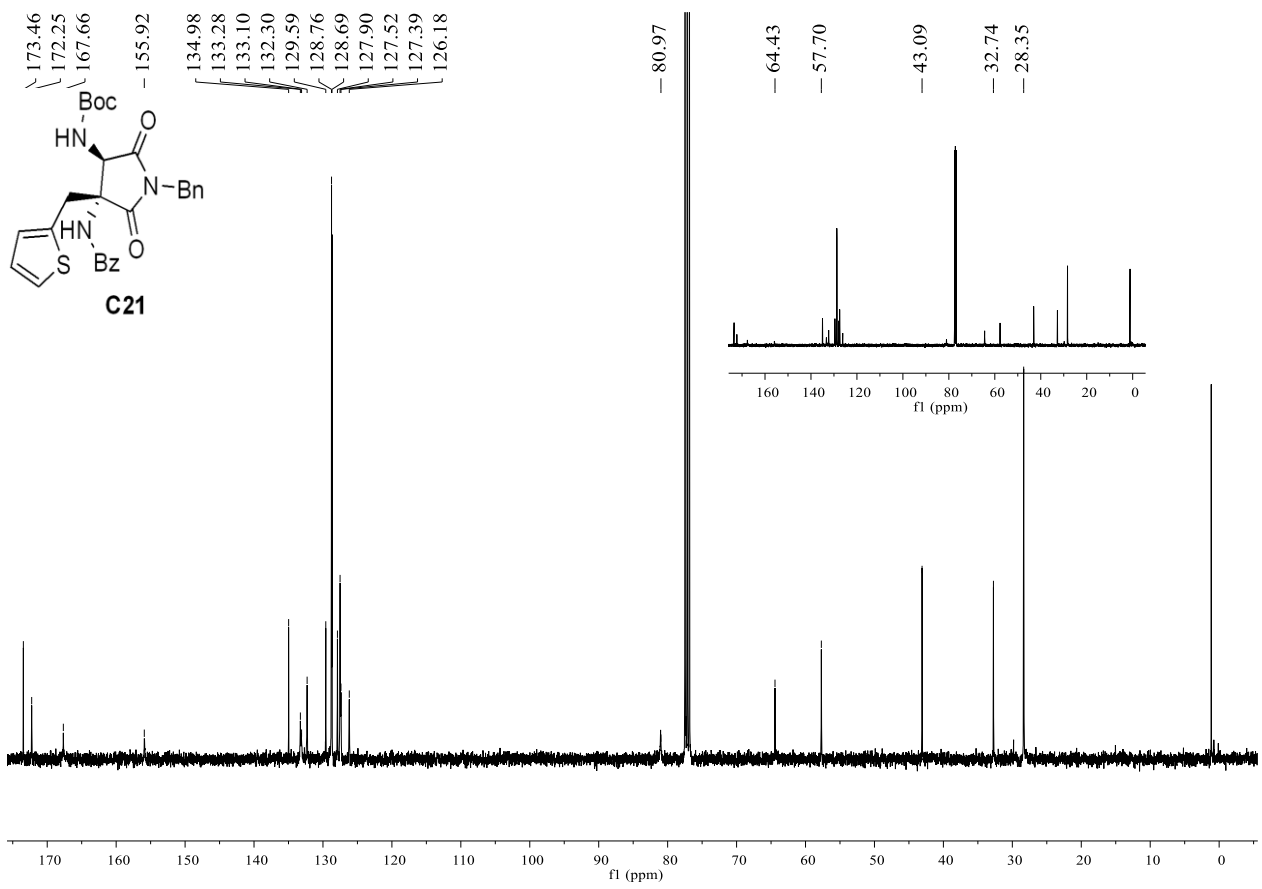



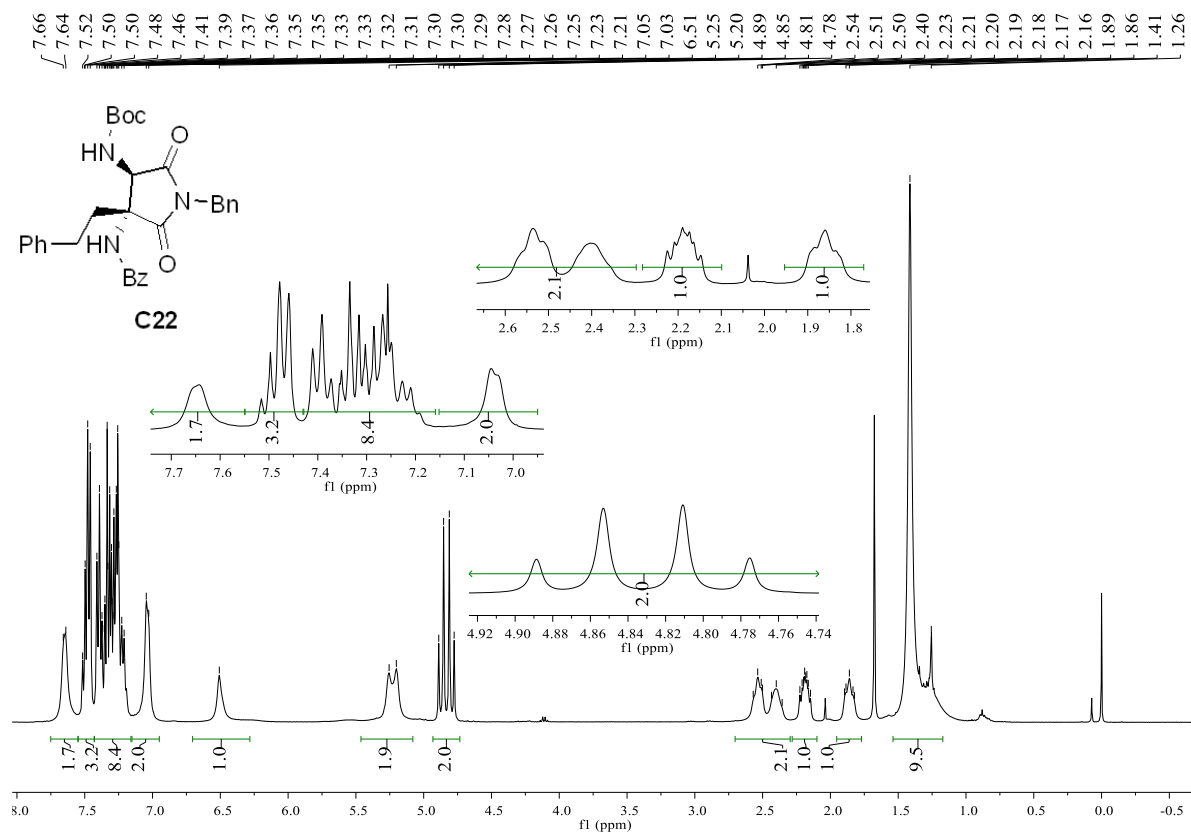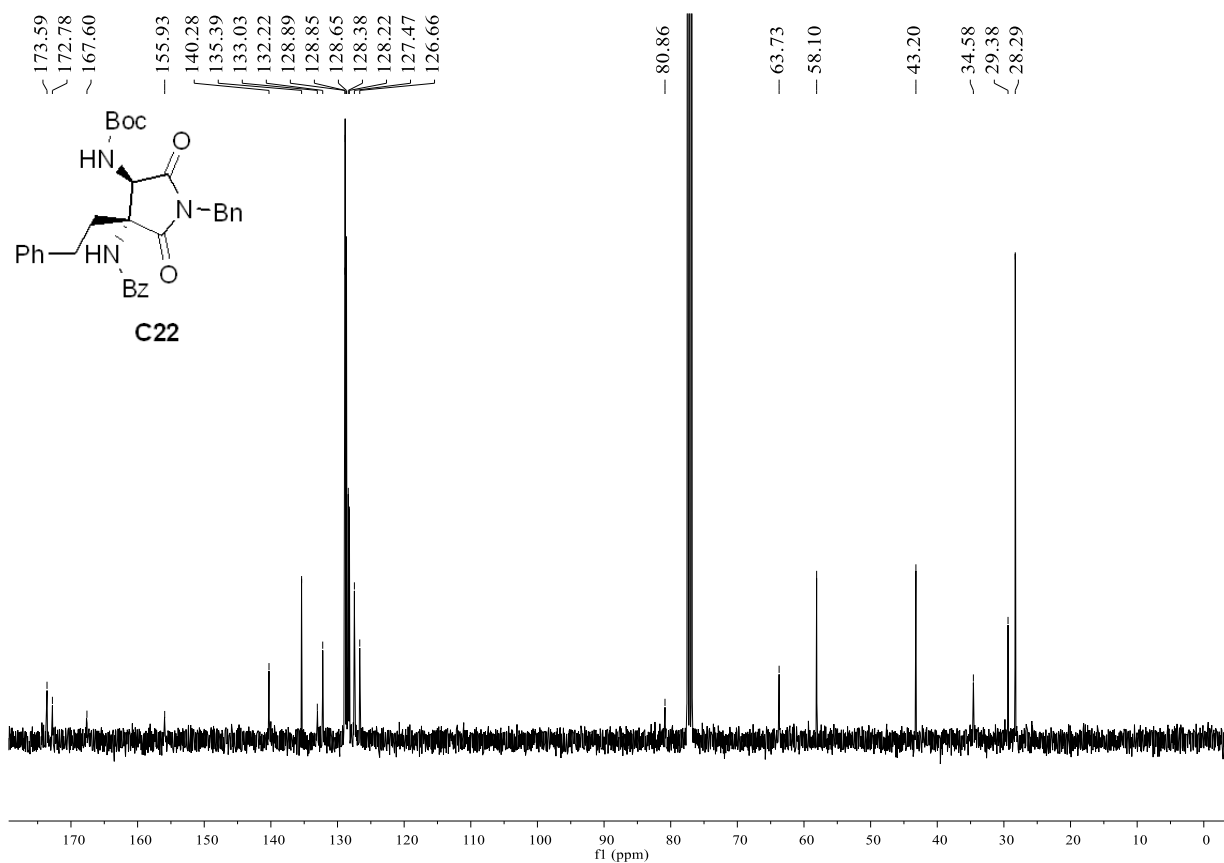

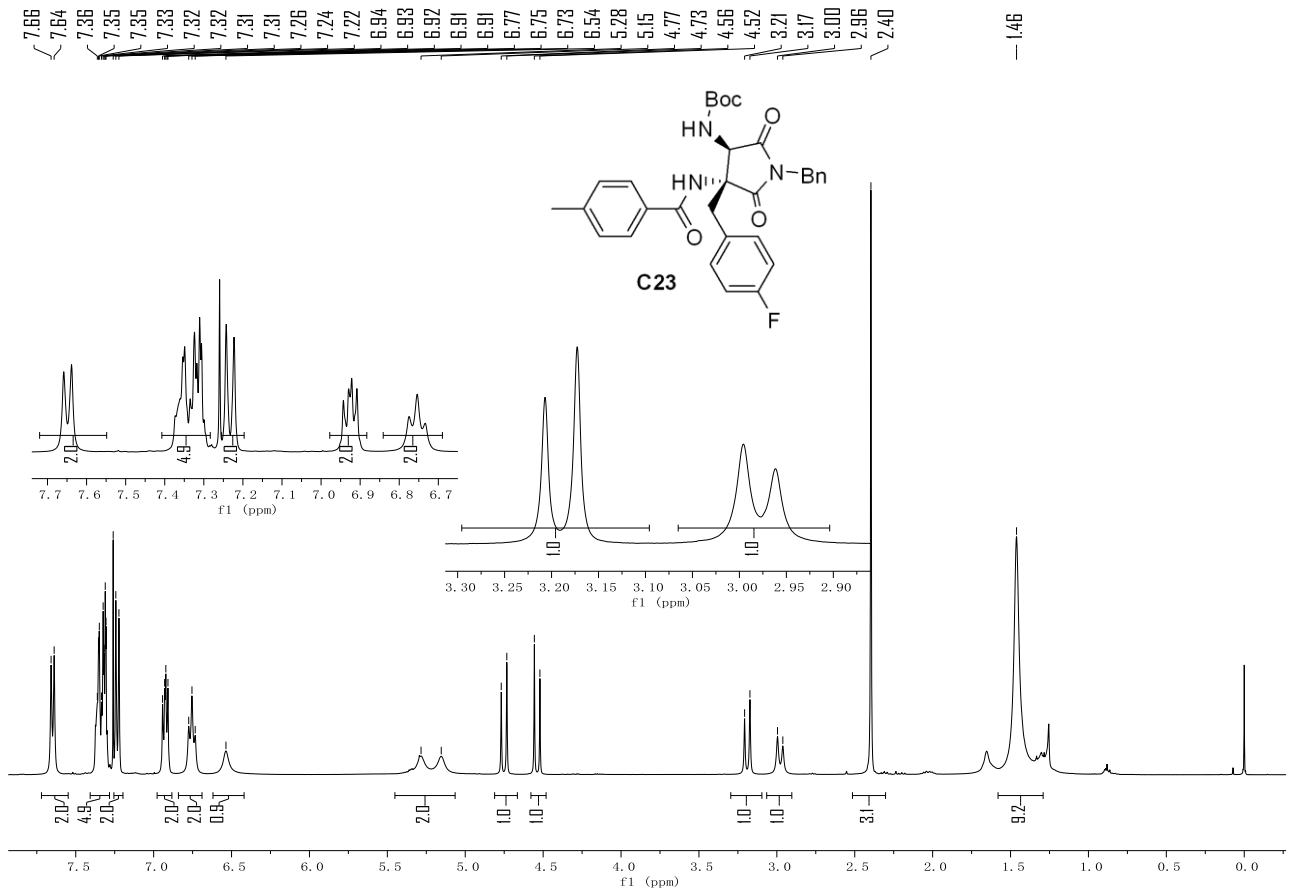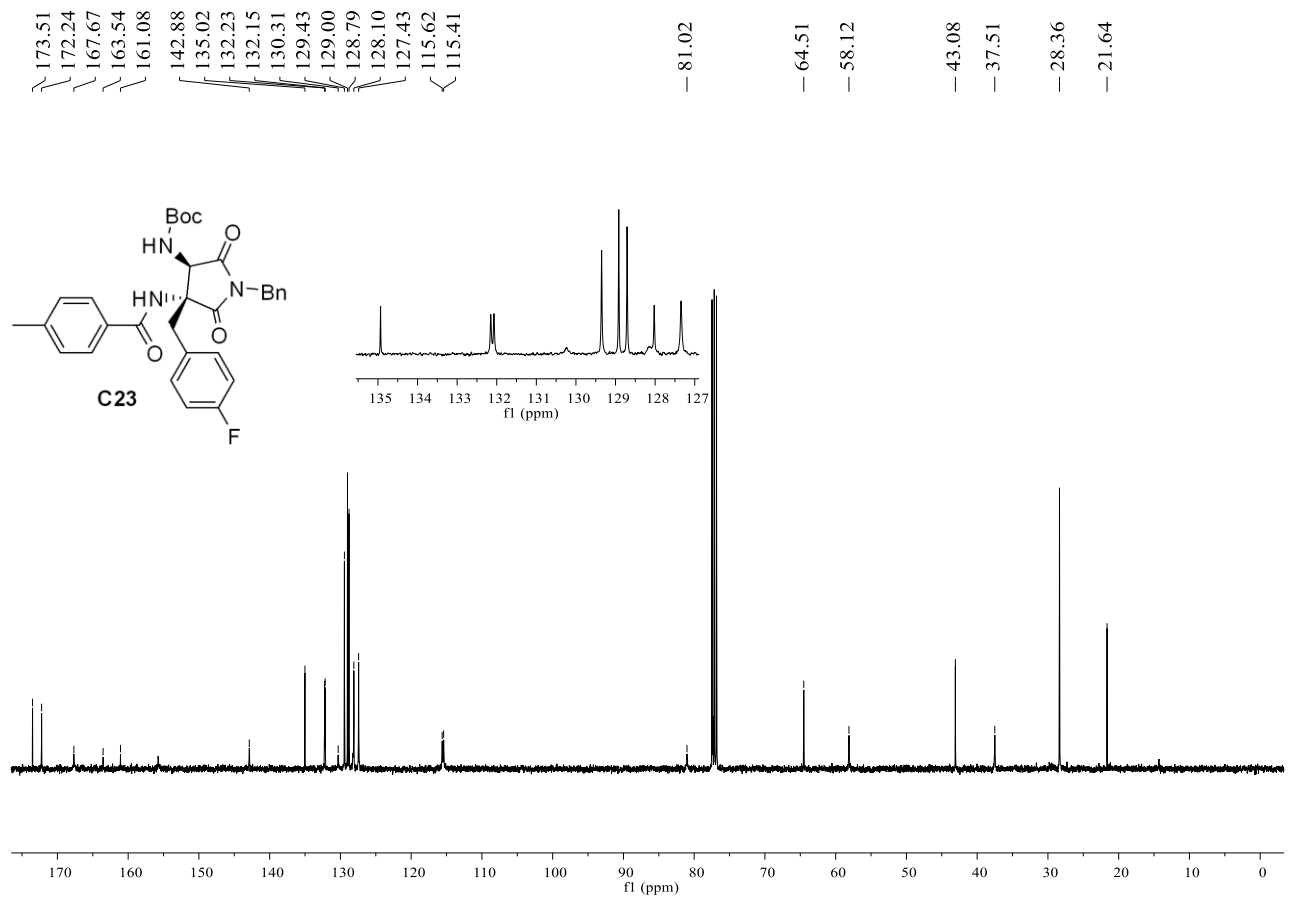

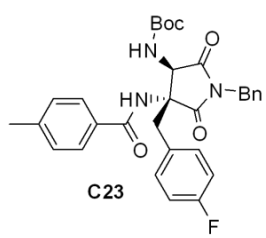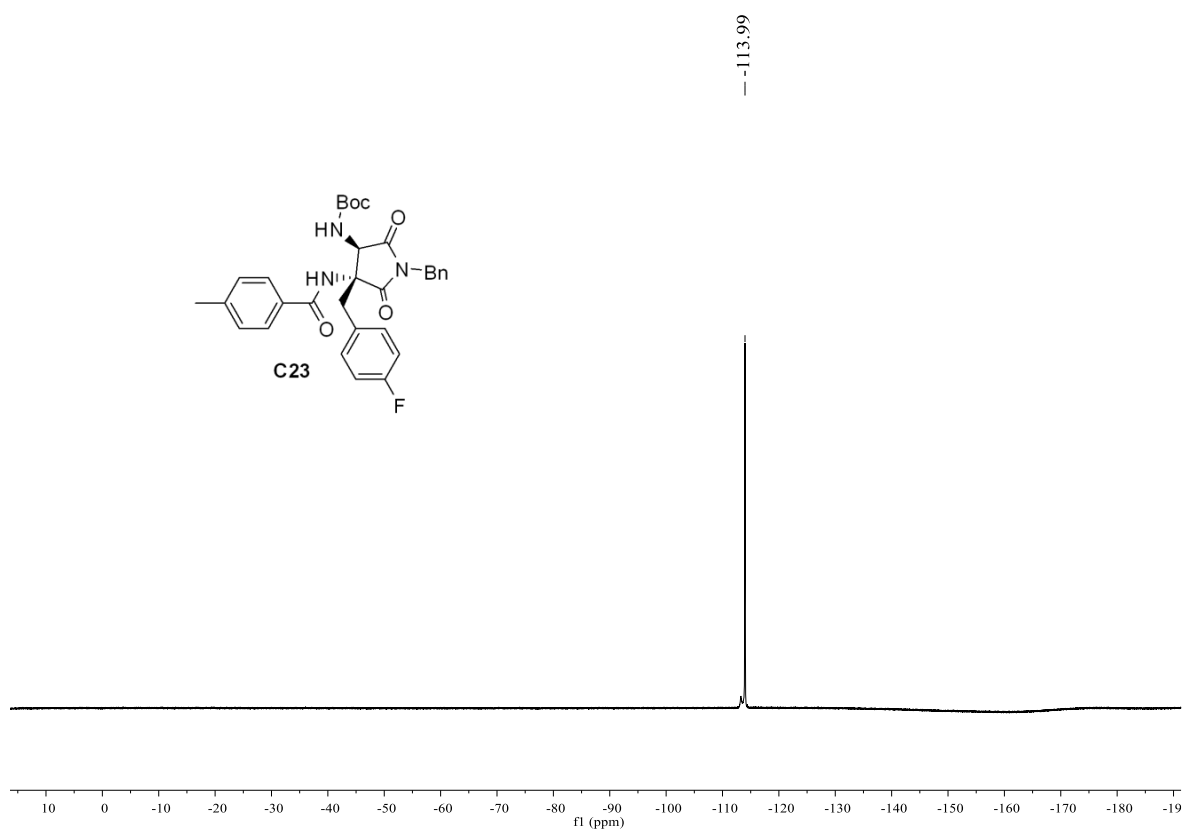

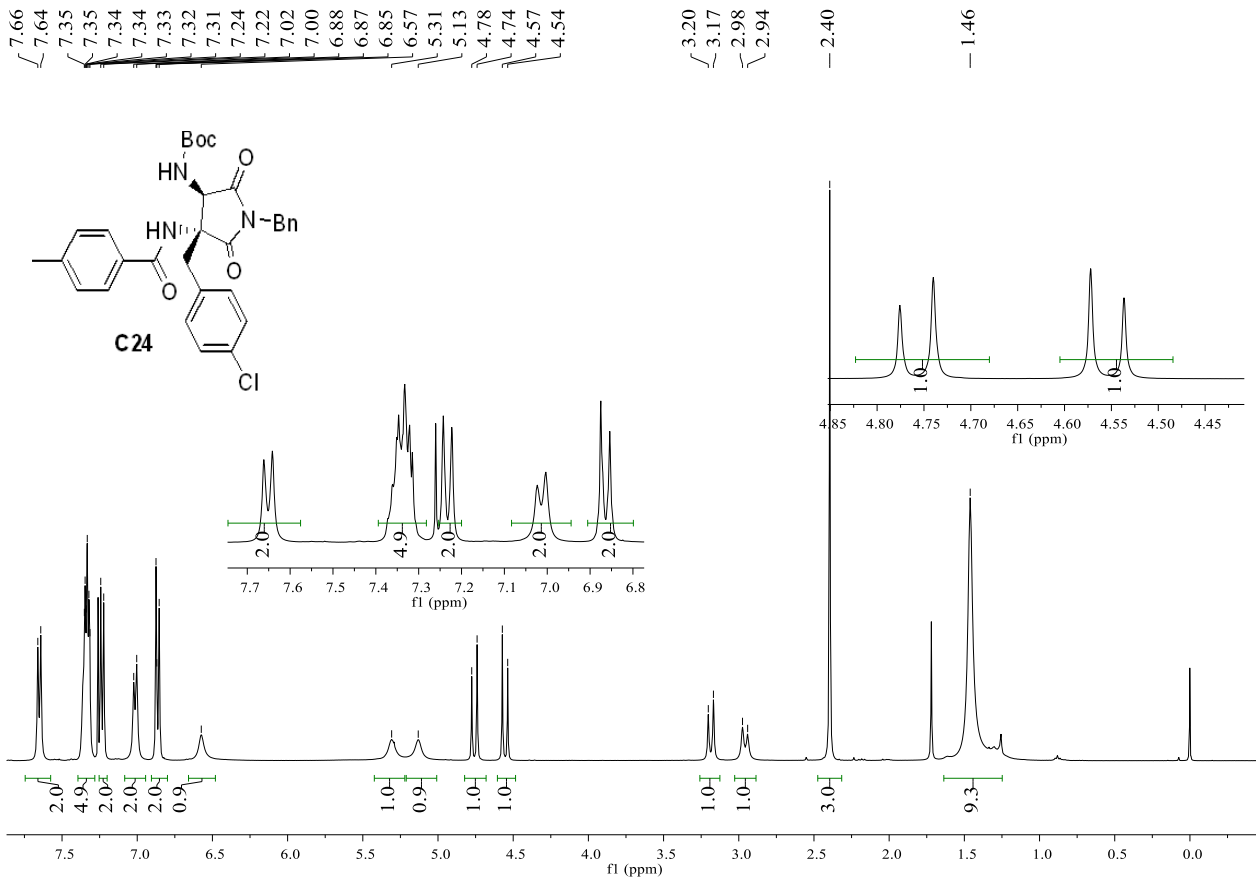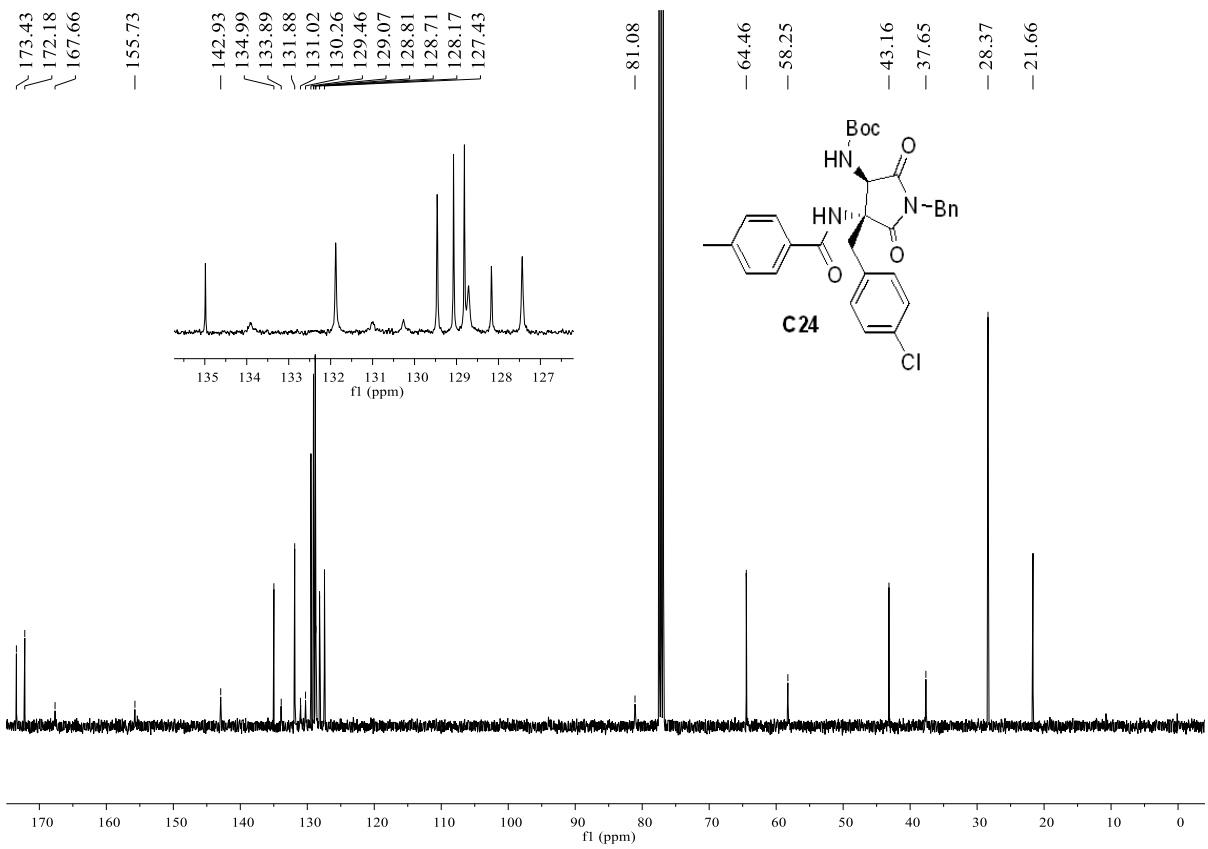

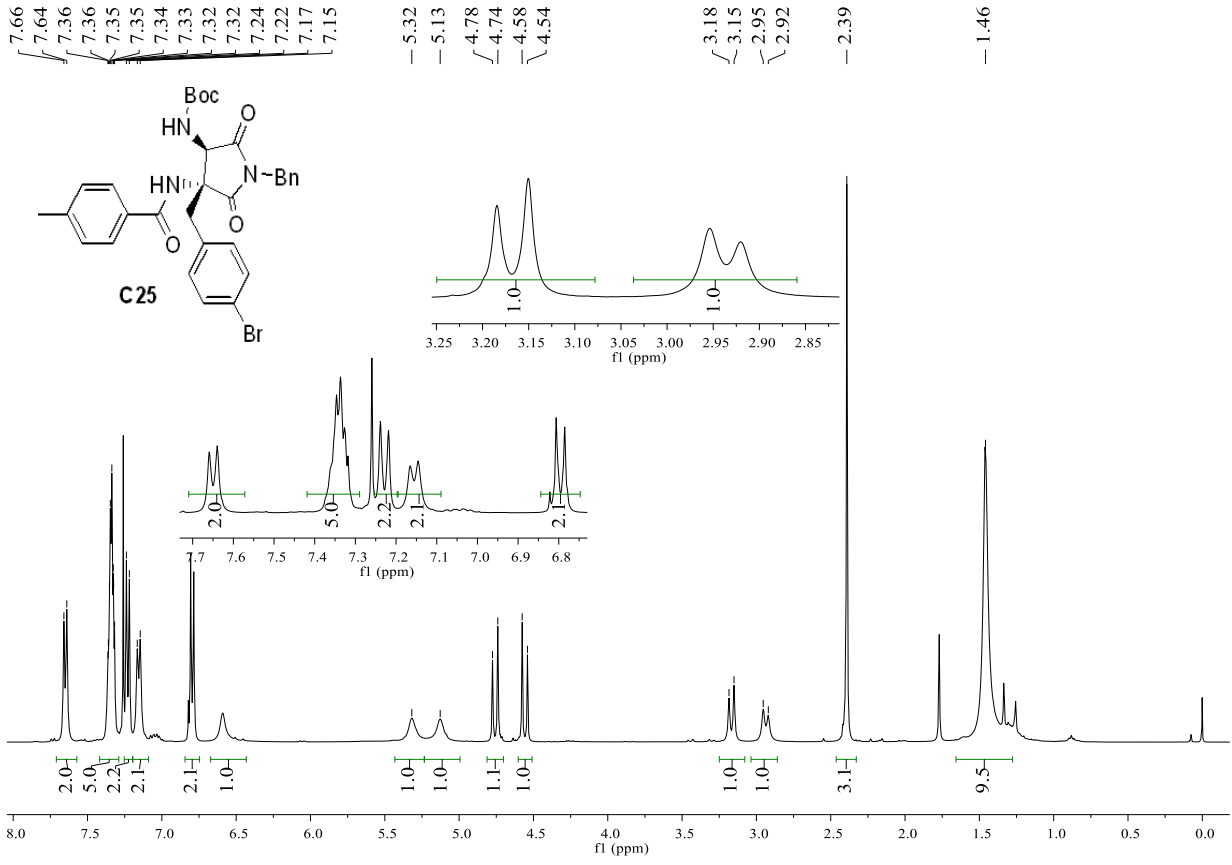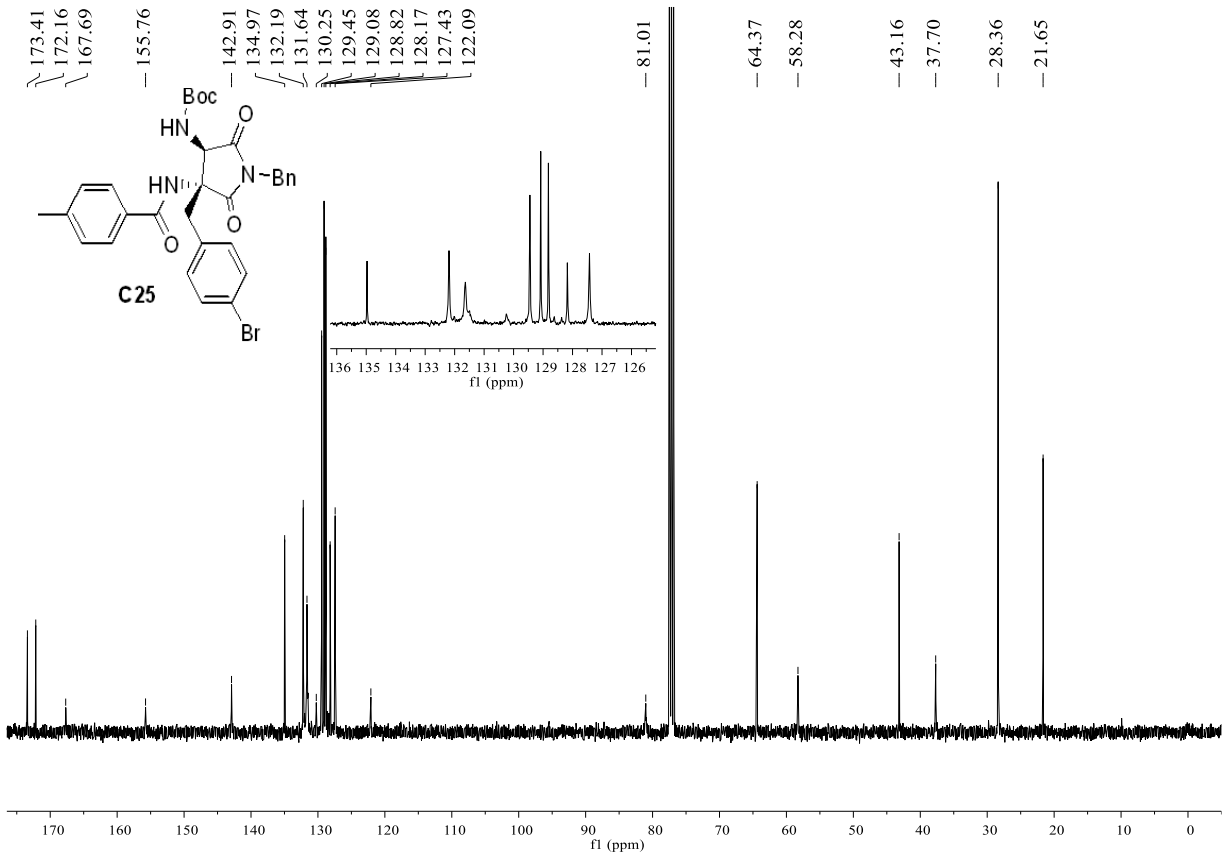

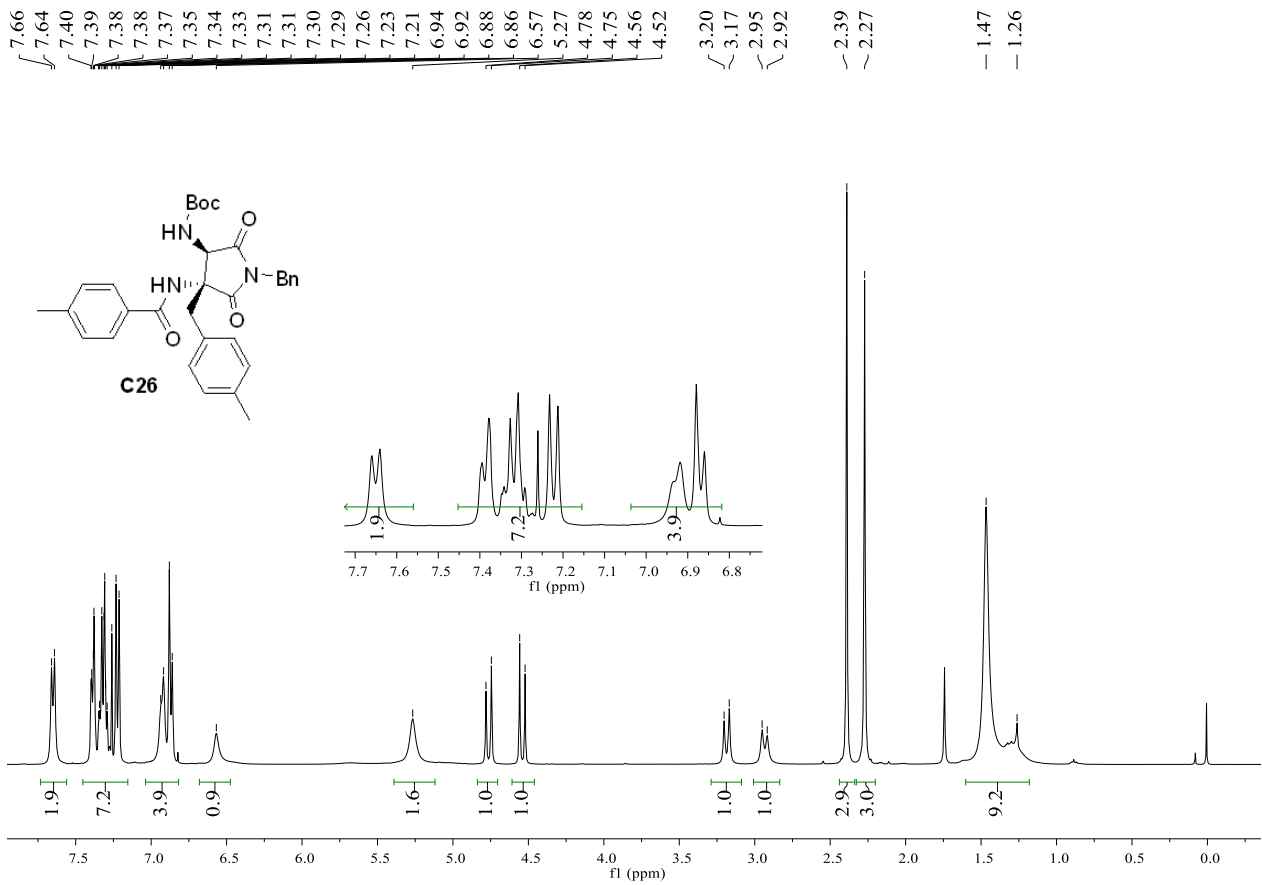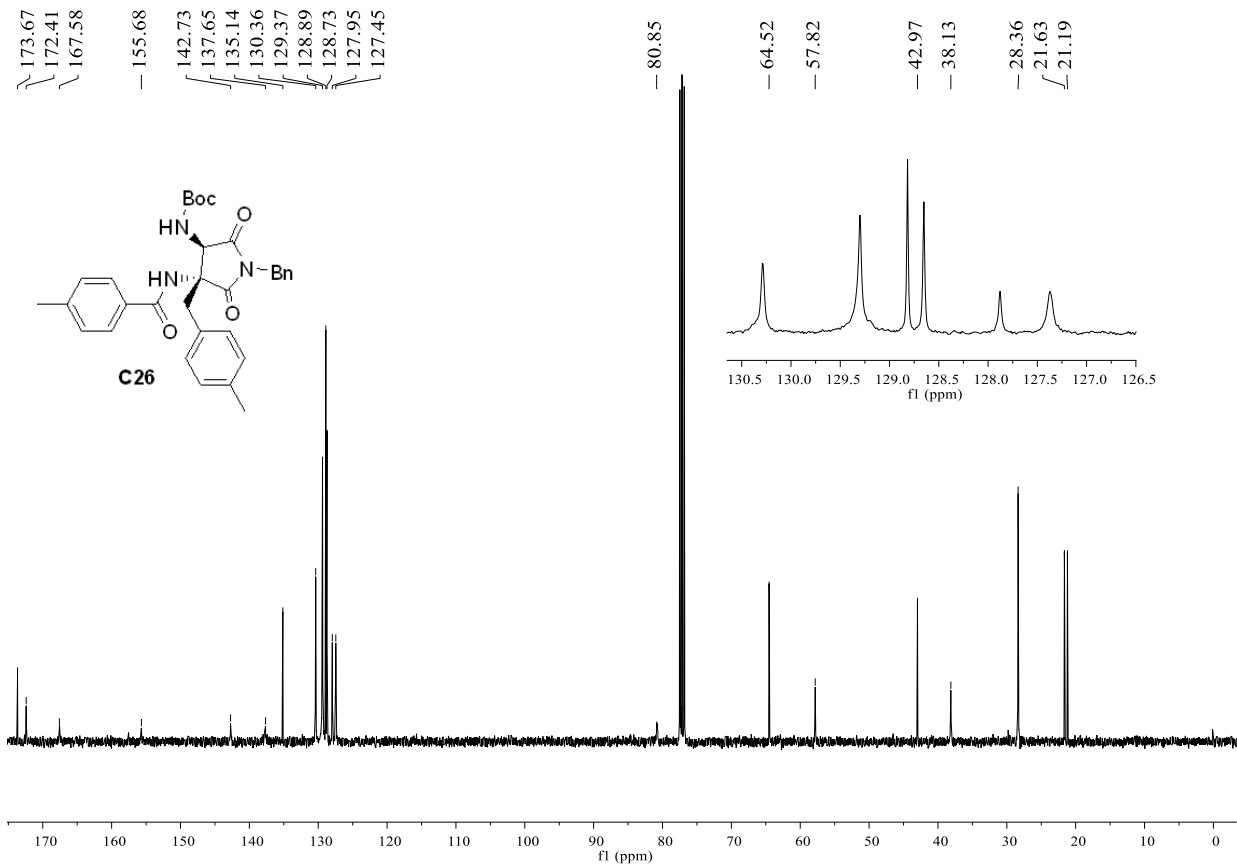

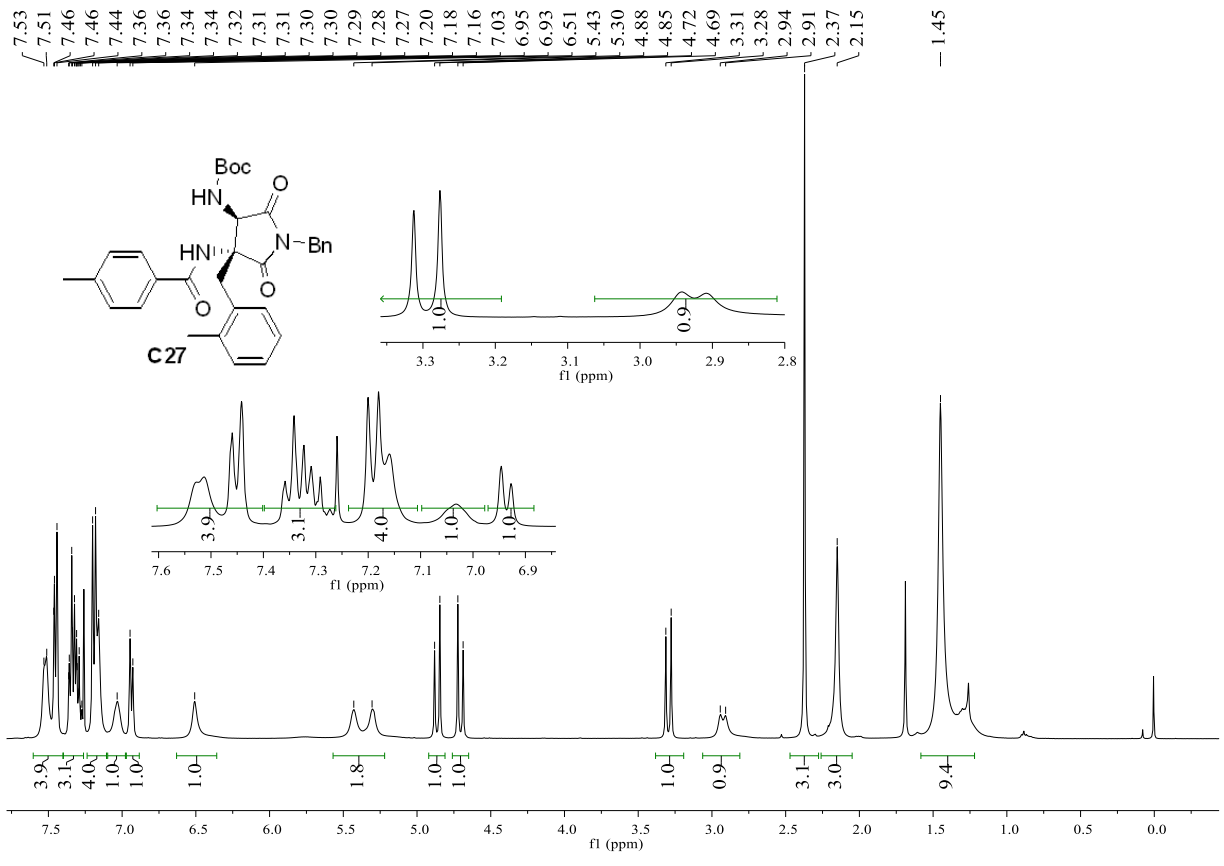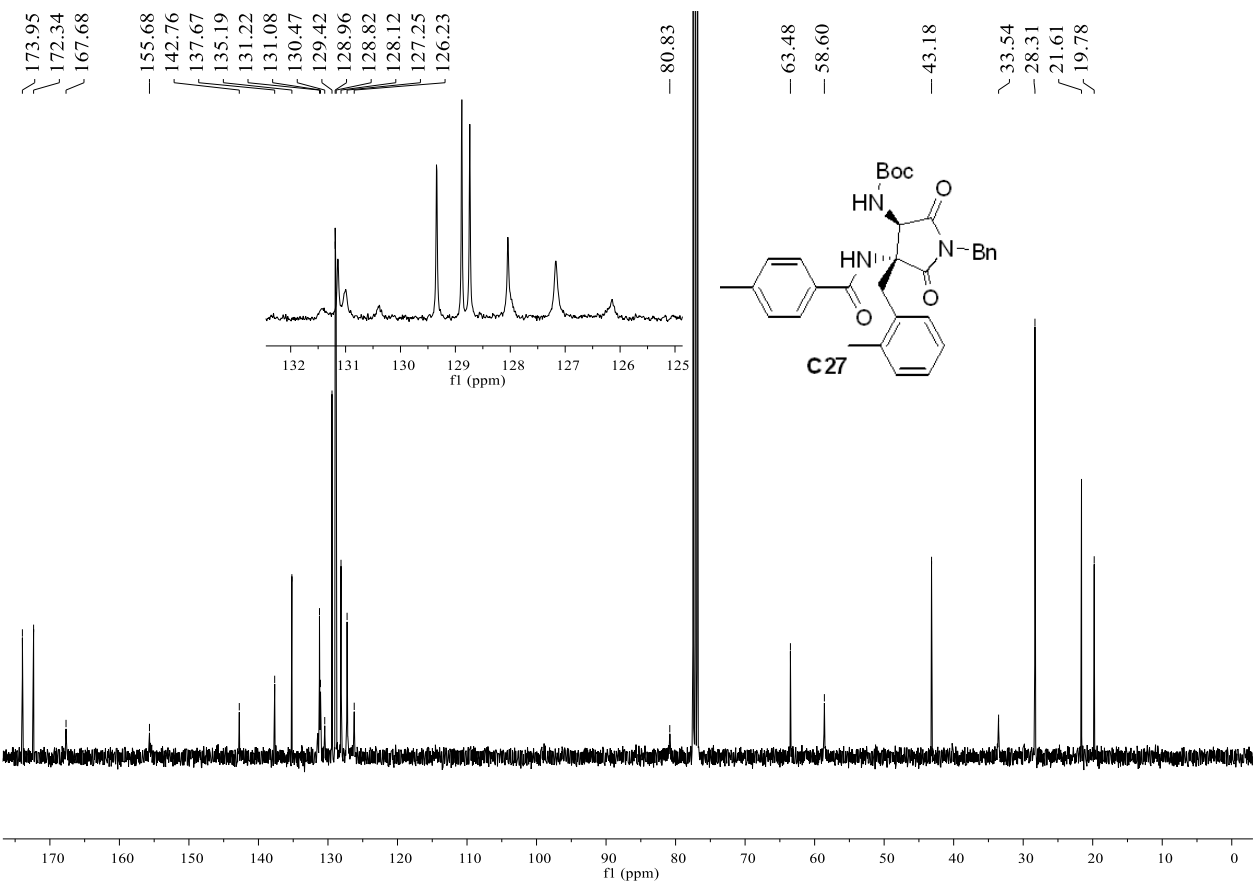

8.07  
8.05  
8.04  
7.92  
7.91  
7.90  
7.81  
7.79  
7.53  
7.51  
7.49  
7.42  
7.41  
7.39  
7.38  
7.36  
7.35  
7.34  
7.34  
7.32  
7.32  
7.20  
7.10  
7.08  
7.03  
7.01  
6.97  
6.95  
6.95  
6.68  
5.50  
5.42  
4.90  
4.86  
4.75  
4.72  
3.91  
3.87  
3.12  
3.08  
2.30  
1.50  
1.49

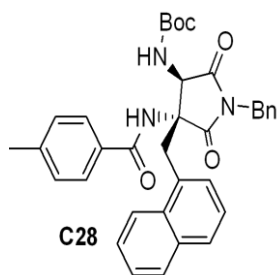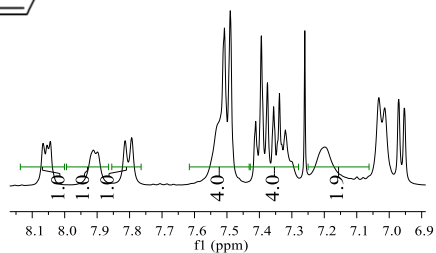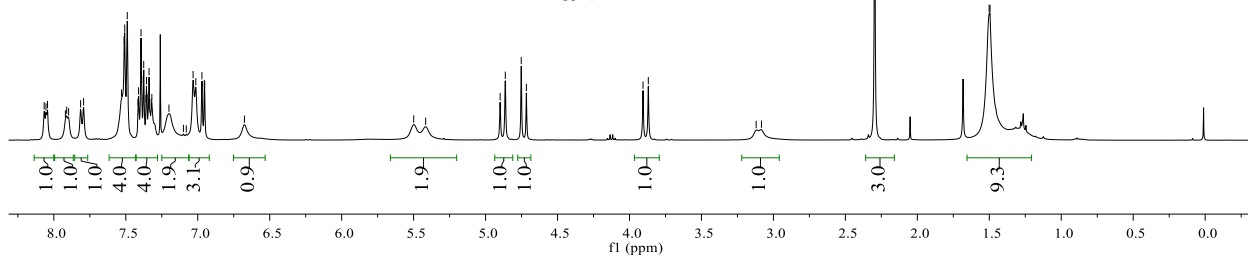

173.30  
172.37  
167.43  
155.78  
142.55  
135.48  
134.05  
132.92  
130.23  
129.69  
129.16  
128.95  
128.88  
128.20  
127.18  
125.86  
125.53  
122.78  
80.86  
64.10  
58.52  
43.11  
32.94  
28.34  
21.51

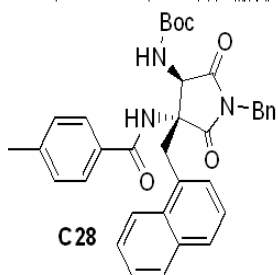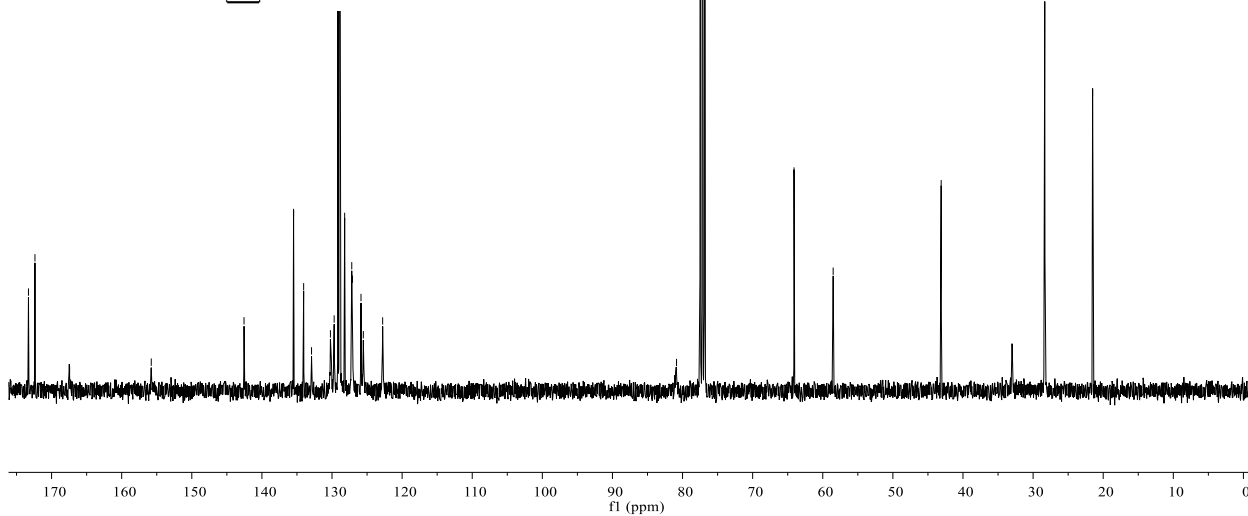



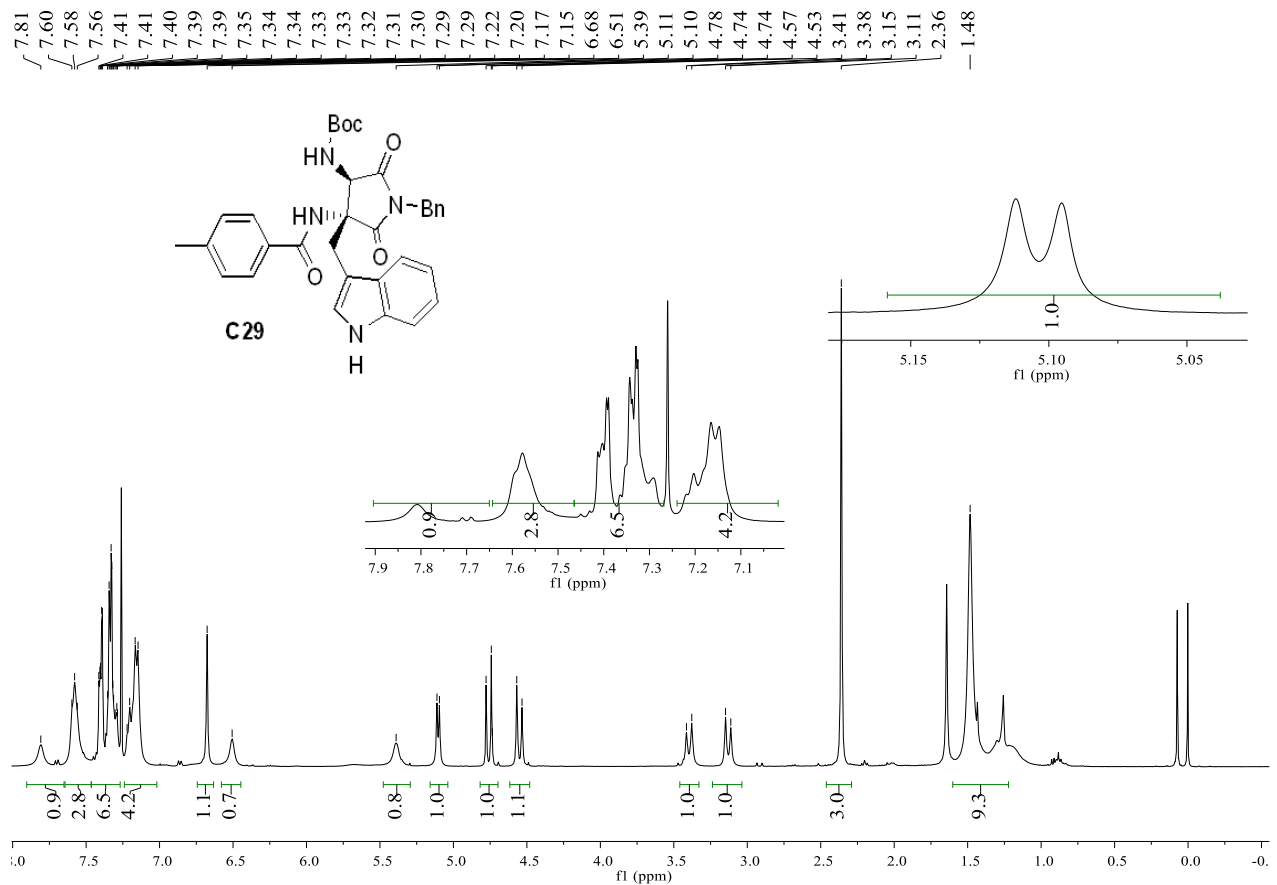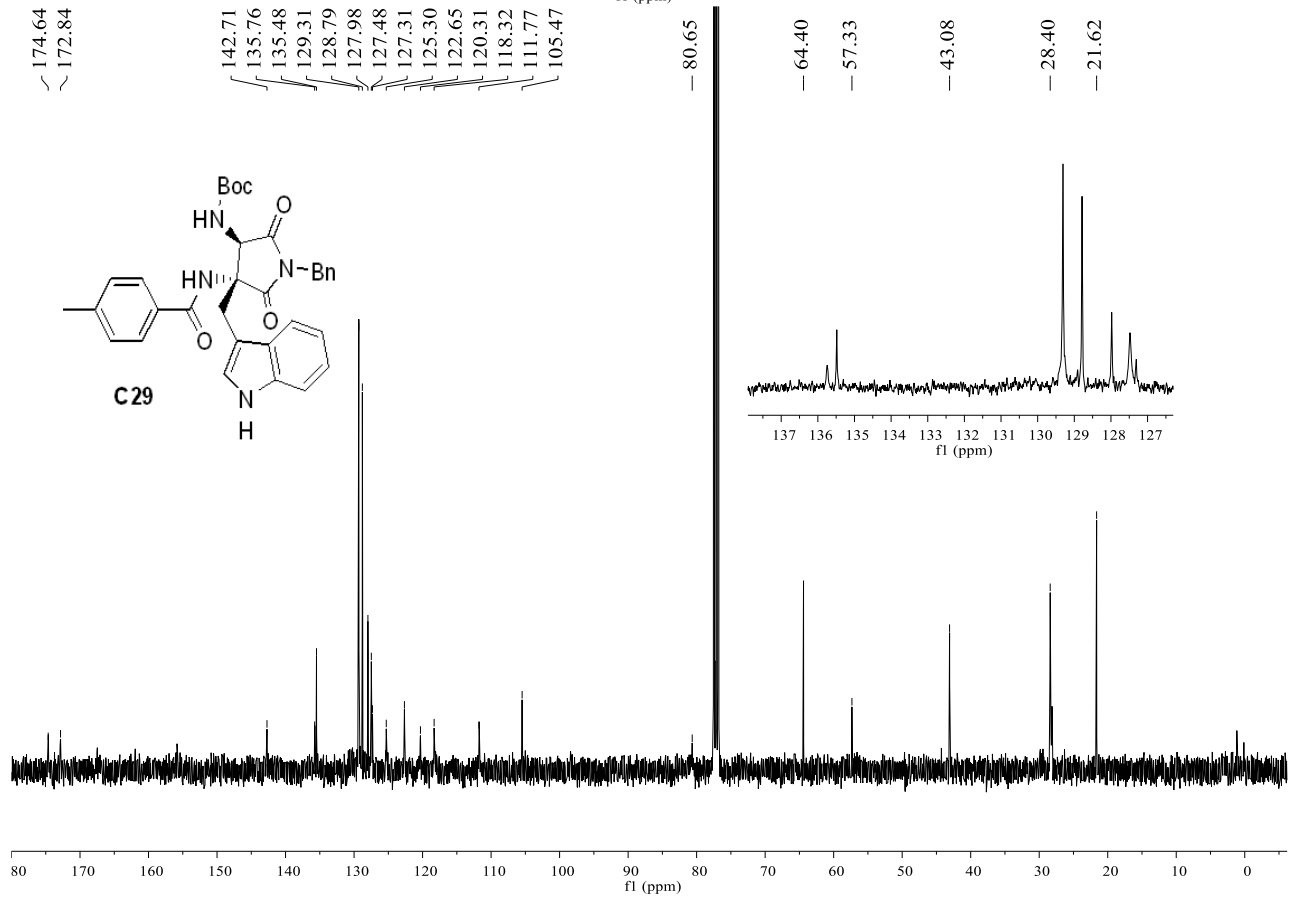

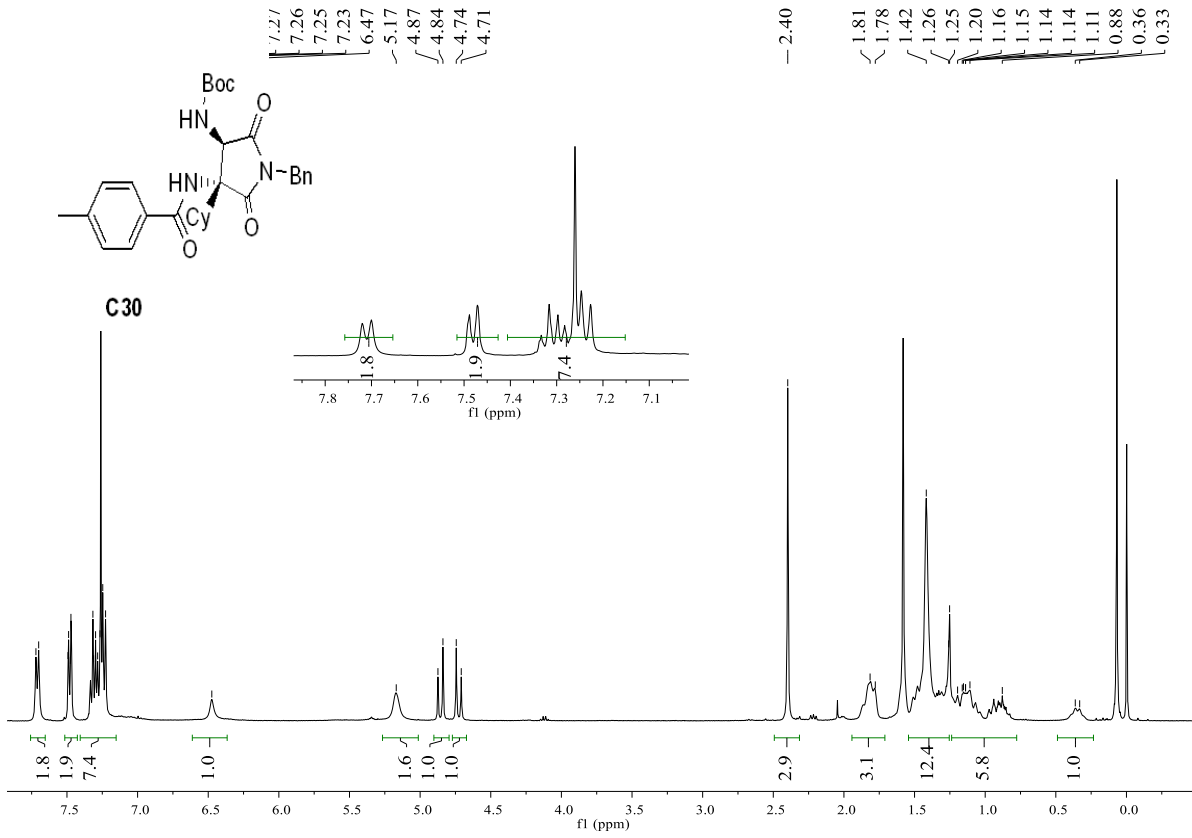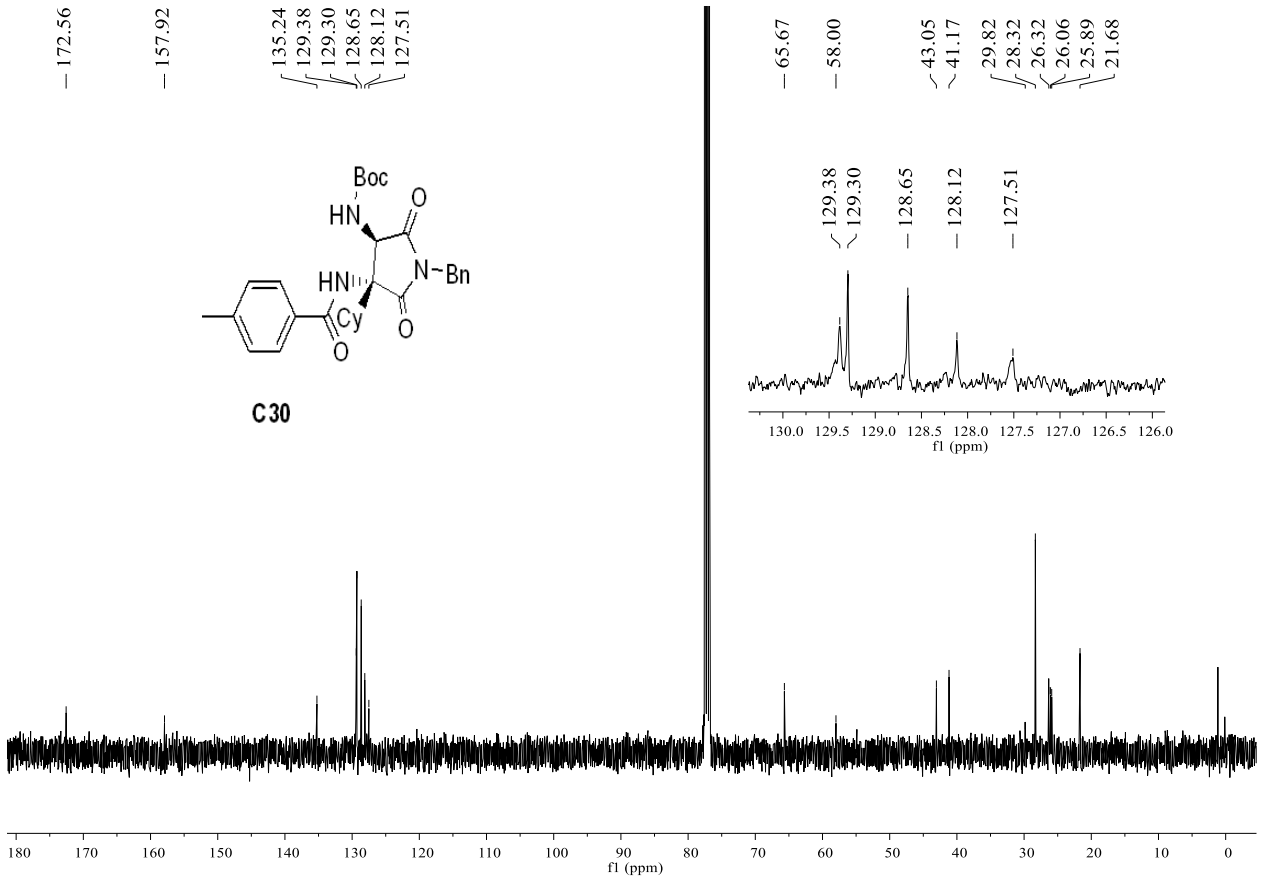

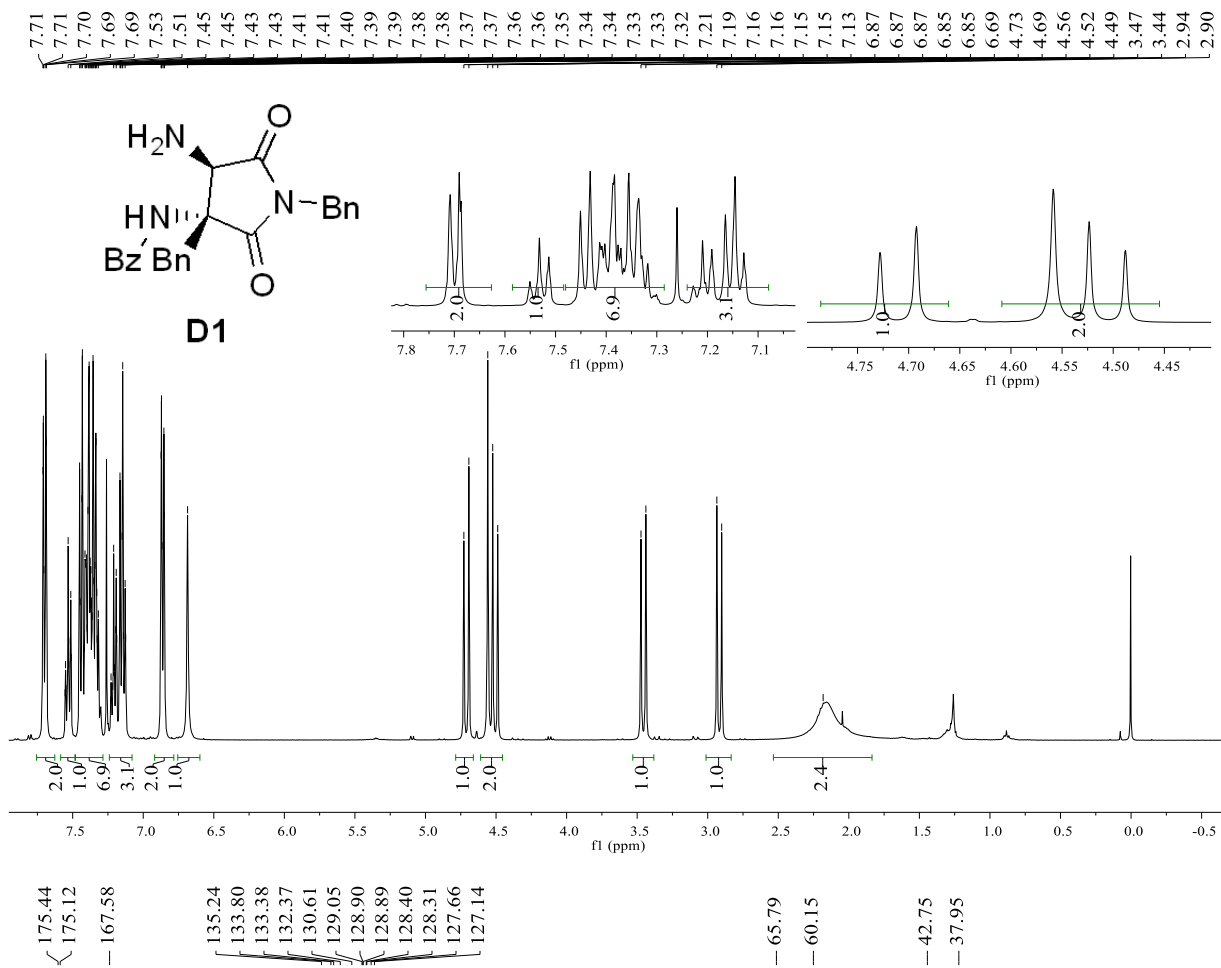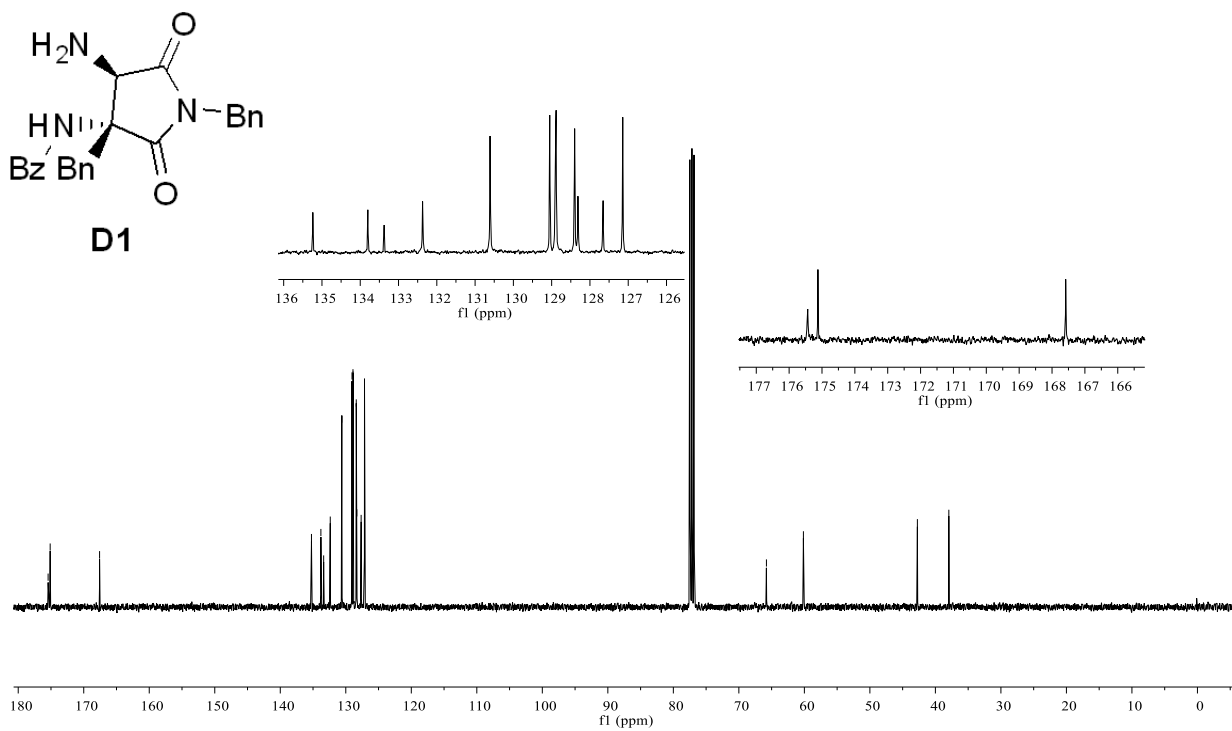

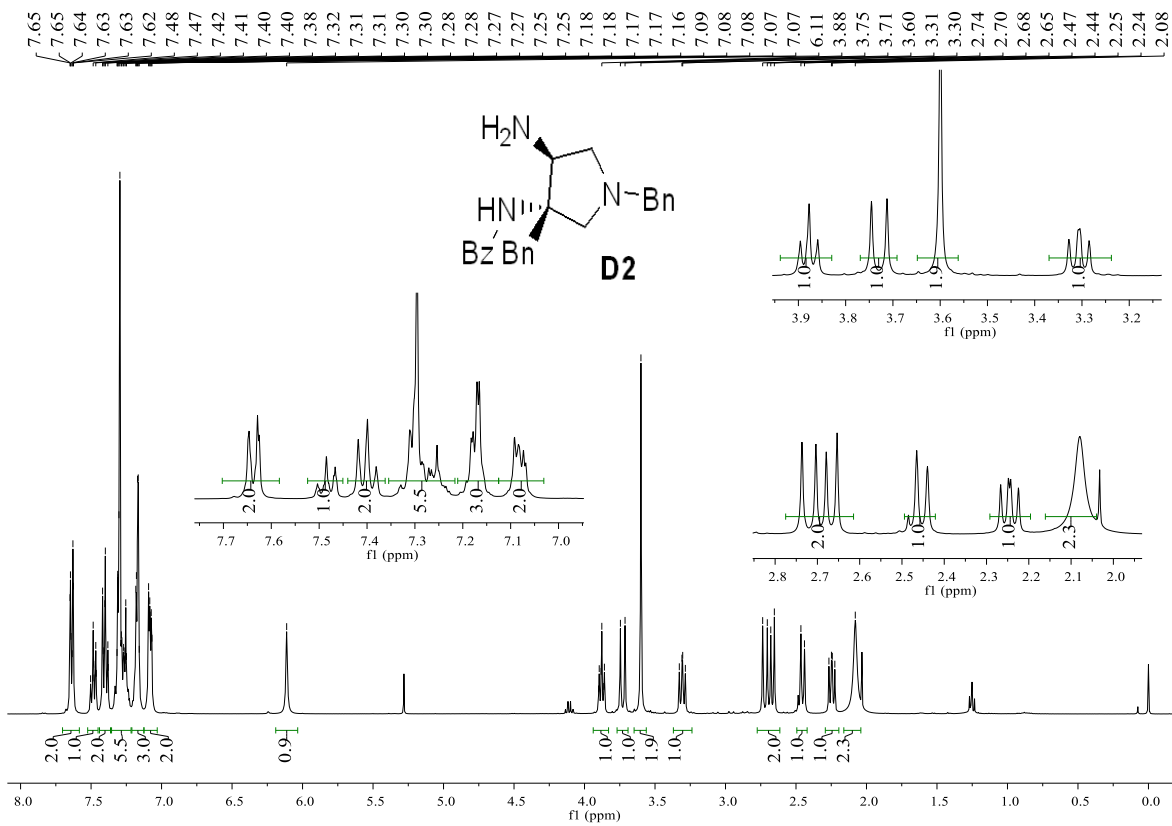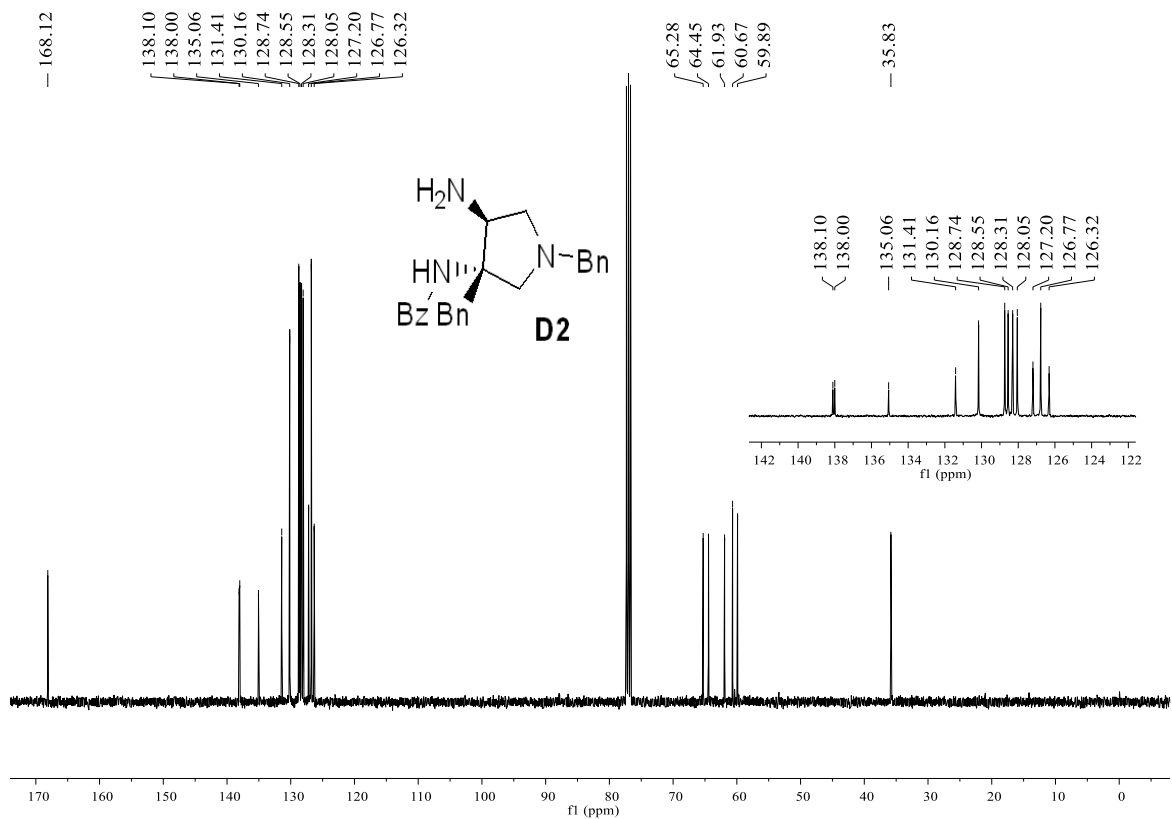

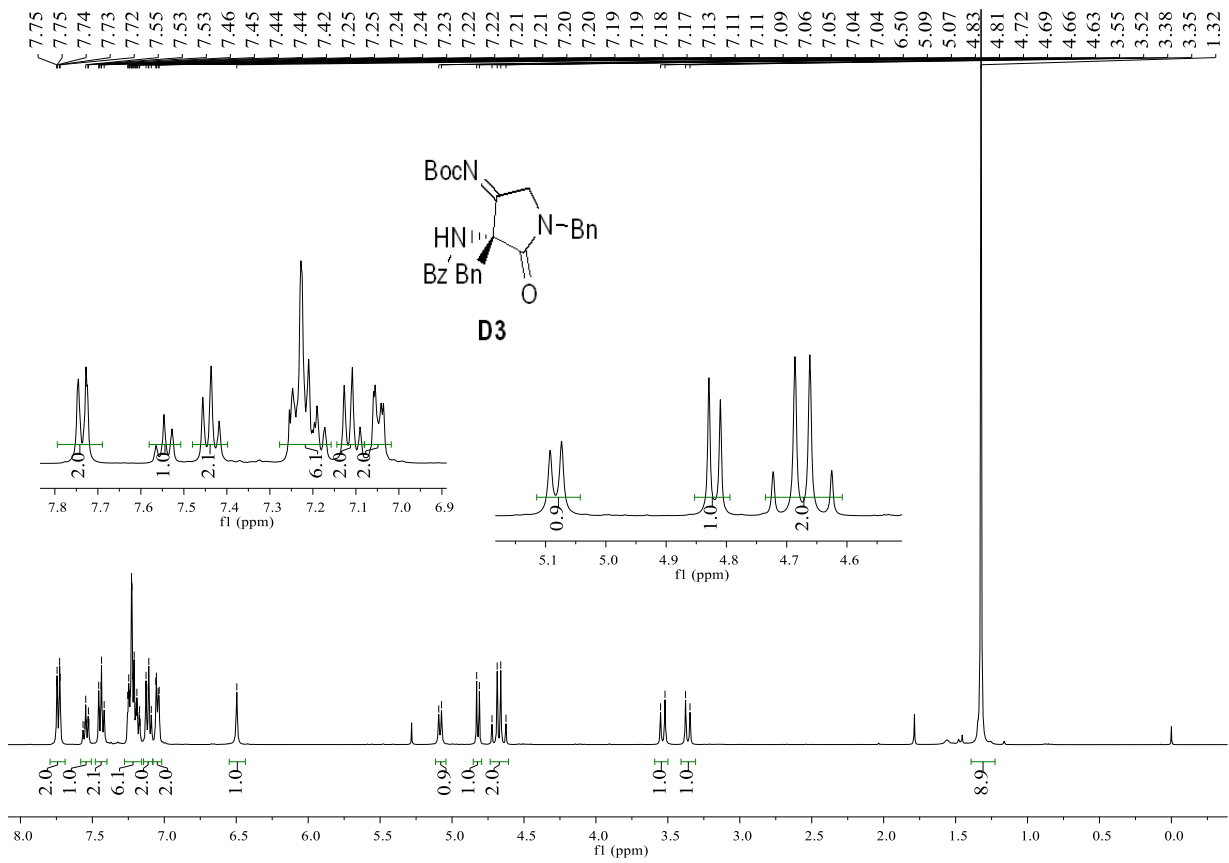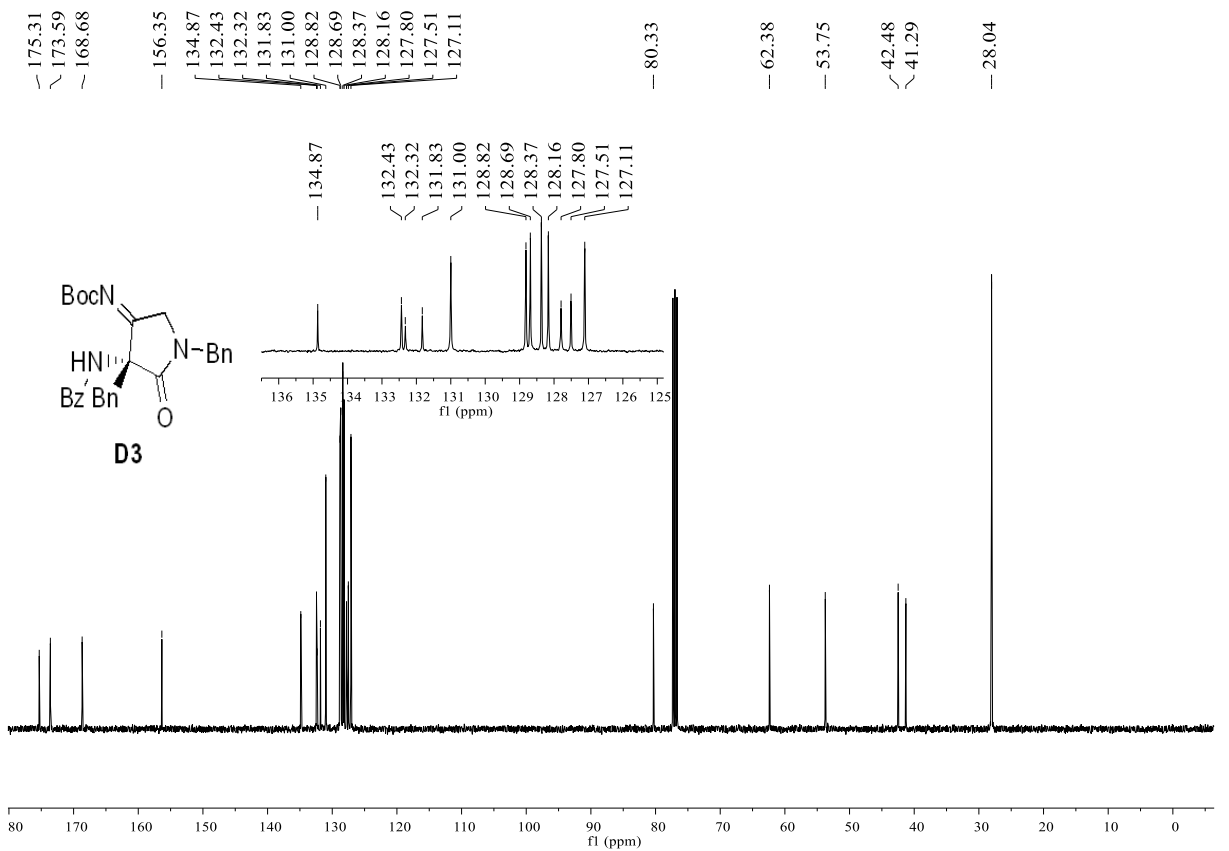

## 16. Reference

1. S. X. Dong, X. H. Liu, X. H. Chen, F. Mei, Y. L. Zhang, B. Gao, L. L. Lin, X. M. Feng, *J. Am. Chem. Soc.*, 2010, **132**, 10650;
2. Z. P. Yu, X. H. Liu, L. Zhou, L. L. Lin, X. M. Feng, *Angew. Chem. Int. Edit.*, **2009**, *48*, 5195.
3. L. Zhao, X. H. Liao, C.J. Li, *Synlett*, **2009**, *18*, 2953.
4. Y. E. You, L. Zhang, L. F. Cui, X. L. Mi, S. Z. Luo, *Angew. Chem. Int. Edit.*, **2017**, *56*, 13814.
5. Sheldrick, G. M. *Acta Cryst.* **2008**, *A64*, 112–122.
6. Sheldrick, G. M. *Acta Cryst.* **2015**, *A71*, 3–8.
7. Sheldrick, G. M. *Acta Cryst.* **2015**, *C71*, 3–8.
8. Dolomanov, O.V., Bourhis, L.J., Gildea, R.J., Howard, J. A. K., Puschmann, H. *J. Appl. Cryst.* **2009**, *42*, 339-341.
9. Spek, A. L. *J. Appl. Cryst.* **2003**, *36*, 7–13.
10. M. J. Frisch, G. W. Trucks, H. B. Schlegel, G. E. Scuseria, M. A. Robb, J. R. Cheeseman, G. Scalmani, V. Barone, B. Mennucci, G. A. Petersson, H. Nakatsuji, M. Caricato, X. Li, H. P. Hratchian, A. F. Izmaylov, J. Bloino, G. Zheng, J. L. Sonnenberg, M. Hada, M. Ehara, K. Toyota, R. Fukuda, J. Hasegawa, M. Ishida, T. Nakajima, Y. Honda, O. Kitao, H. Nakai, T. Vreven, J. A. Montgomery, J. J. E. Peralta, F. Ogliaro, M. Bearpark, J. J. Heyd, E. Brothers, K. N. Kudin, V. N. Taroverov, T. Keith, R. Kobayashi, J. Normand, K. Raghavachari, A. Rendell, J. C. Burant, S. S. Iyengar, J. Tomasi, M. Cossi, N. Rega, J. M. Millam, M. Klene, J. E. Knox, J. B. Cross, V. Bakken, C. Adamo, J. Jaramillo, R. Gomperts, R. E. Stratmann, O. Yazyev, A. J. Austin, R. Cammi, C. Pomelli, J. W. Ochterski, R. L. Martin, K. Morokuma, V. G. Zakrzewski, G. A. Voth, P. Salvador, J. J. Dannenberg, S. Dapprich, A. D. Daniels, O. Farkas, J. B. Foresman, J. V. Ortiz, J. Cioslowski, D. J. Fox. Gaussian 09 (Revision D.01) I. *Gaussian, Wallingford, CT*, **2013**.
11. Y. Zhao and D. G. Truhlar. *Theor. Chem. Acc.* *120*, 215-241.
12. P. C. Hariharan and J. A. Pople. *Mol. Phys.* **1974**, *27*, 1, 209–214.
13. M. M. Francl, W. J. Pietro, W. J. Hehre, J. S. Binkley, D. J. DeFrees, J. A. Pople, and M. S. Gordon. *J. Chem. Phys.* **1982**, *77*, 3654–3665.
14. R. Cammi, J. Tomasi. *J. Chem. Phys.* **1994**, *100*, 7495–7502.
15. K. Raghavachari, J. S. Binkley, R. Seeger, and J. A. Pople. *J. Chem. Phys.* **1980**, *72*, 650–654.
16. A. D. McLean and G. S. Chandler. *J. Chem. Phys.* **1980**, *72*, 5639–5648.
17. T. Lu, Q. Chen. *Comput. Theor. Chem.* **2021**, *1200*, 113249.
18. T. Lu, F. Chen. *J. Comput. Chem.* **2012**, *33*, 580-592.
19. T. Lu, Q. Chen. *J. Comput. Chem.*, **2022**, *43*, 539-555.
20. W. Humphrey, A. Dalke, K. Schulten. *Journal of molecular graphics* 1996, *14*, 33-38.
21. C. Y. Legault, CYLview20, Université de Sherbrooke, **2020** (<http://www.cylview.org>).
